# Supplementary material for: An improved protocol for LA-MC-ICP-MS isotope ratio measurements of natural silicon at 213 nm: comparison of mass bias correction factor dependence (solution vs. solid single crystal) and solid sample homogeneity
Source: Royal Society of Chemistry journal article supplement (doi:10.1039/d5ja00015g), 2025-01-01
Supplement: d5ja00015g1.xlsx [file d5ja00015g1.xlsx]

## Sheet: Tuning
	Resolution/Interferences
	Mass scans around all three Si isotopes using the WAO04 samples: solid sample and liquid solution sample; the non-perfect horizontal plateaus obtained by LA originate from scattering/fluctuation of the ion signals during LA as well as from limited step width during short time mass scans.
	Left: Traces of all three isotopes (absolute scale). Right: without 28Si-traces.
	The vertical yellow dashed line indicates the static centered mass of the three isotopes.

## Sheet: two vol cell
	two-volume cell: home-built Al sample holder

## Sheet: He mass flow all data
	Laserablation -He mass flow characterization
	solid samples		WASO04
	dissolved sample		WASO04 4 µg/g
	Neptune XT
	ESI NWR213
	WASO04 Laserablation 400 mL/min
	1st run						not blank corr				2nd run						not blank corr
Cycle	27.94	28.925	29.916	28.925/27.94 (1)	29.916/28.925 (2)		29/28	30/28	30/29		27.94	28.925	29.916	28.925/27.94 (1)	29.916/28.925 (2)		29/28	30/28	30/29
1											0.084774	0.00451943	0.00429482	0.0533116	0.9503		0.0533116	0.050662	0.9503
2	0.0896095	0.00476688	0.00455356	0.0531961	0.955251		0.0531961	0.0508156	0.955251		0.0828622	0.00446391	0.00425782	0.0538715	0.953832		0.0538715	0.0513843	0.953832
3	0.0706826	0.00370782	0.00387986	0.0524573	1.0464		0.0524573	0.0548914	1.0464		0.0794016	0.00425734	0.00410003	0.0536178	0.963049		0.0536178	0.0516366	0.963049
4	0.071672	0.00379399	0.00389738	0.0529354	1.02725		0.0529354	0.0543779	1.02725		0.43759	0.0722875	0.0515758	0.165194	0.713481		0.165194	0.117863	0.713481
5	0.0719789	0.00382411	0.00385077	0.0531282	1.00697		0.0531282	0.0534986	1.00697		0.46309	0.0319486	0.0230153	0.0689901	0.720386		0.0689901	0.0496995	0.720386
6	0.0901709	0.00477628	0.00446119	0.0529692	0.934029		0.0529692	0.0494748	0.934029		0.741448	0.0394251	0.0285924	0.0531731	0.725232		0.0531731	0.0385629	0.725232
7	1.19168	0.0634565	0.0454604	0.0532497	0.716403		0.0532497	0.0381482	0.716403		9.88127	0.532656	0.371683	0.0539056	0.697792		0.0539056	0.0376149	0.697792
8	24.8184	1.35967	0.94693	0.0547846	0.696442		0.0547846	0.0381543	0.696442		26.6235	1.43473	0.999168	0.0538896	0.696415		0.0538896	0.0375295	0.696415
9	47.7462	2.6422	1.83757	0.0553385	0.695468		0.0553385	0.0384861	0.695468		33.1342	1.77622	1.23578	0.0536067	0.695739		0.0536067	0.0372963	0.695739
10	47.1217	2.57624	1.7916	0.0546721	0.695431		0.0546721	0.0380207	0.695431		30.6608	1.65468	1.15126	0.0539672	0.695759		0.0539672	0.0375482	0.695759
11	47.3263	2.60442	1.81128	0.0550312	0.695464		0.0550312	0.0382722	0.695464		26.9445	1.57404	1.09476	0.0584178	0.695512		0.0584178	0.0406302	0.695512
12	40.8247	2.22246	1.54532	0.054439	0.69532		0.054439	0.0378526	0.69532		24.8208	1.34114	0.932873	0.0540329	0.695582		0.0540329	0.0375843	0.695582
13	39.3189	2.13889	1.4872	0.0543986	0.695311		0.0543986	0.037824	0.695311		23.506	1.33133	0.927421	0.056638	0.696612		0.056638	0.0394547	0.696612
14	35.2542	1.92137	1.33651	0.0545004	0.695601		0.0545004	0.0379106	0.695601		25.0793	1.43543	0.999602	0.0572356	0.696378		0.0572356	0.0398576	0.696378
15	33.6596	1.82891	1.27211	0.0543354	0.695556		0.0543354	0.0377933	0.695556		22.4022	1.20051	0.835564	0.0535889	0.696008		0.0535889	0.0372983	0.696008
16	32.9313	1.80008	1.25188	0.0546618	0.695456		0.0546618	0.0380149	0.695456		22.1177	1.18645	0.825689	0.0536425	0.695934		0.0536425	0.0373316	0.695934
17	29.7715	1.61575	1.12399	0.0542718	0.695644		0.0542718	0.0377539	0.695644		20.7	1.19015	0.828127	0.0574951	0.695818		0.0574951	0.0400062	0.695818
18	30.303	1.66018	1.15455	0.0547858	0.69544		0.0547858	0.0381002	0.69544		23.6965	1.28461	0.894262	0.0542111	0.696134		0.0542111	0.0377382	0.696134
19	33.1431	1.83414	1.27565	0.0553398	0.695503		0.0553398	0.038489	0.695503		21.5707	1.21356	0.844607	0.0562598	0.695973		0.0562598	0.0391553	0.695973
20	37.9358	2.05085	1.42645	0.0540612	0.69554		0.0540612	0.0376017	0.69554		23.202	1.2516	0.870979	0.0539434	0.695895		0.0539434	0.037539	0.695895
21	37.0133	2.02667	1.40949	0.0547551	0.69547		0.0547551	0.0380805	0.69547		22.3532	1.20593	0.83913	0.053949	0.695834		0.053949	0.0375395	0.695834
22	35.1191	1.90041	1.32143	0.0541135	0.695338		0.0541135	0.0376272	0.695338		23.474	1.26868	0.883175	0.0540464	0.696136		0.0540464	0.0376236	0.696136
23	38.2023	2.04973	1.42542	0.0536546	0.695419		0.0536546	0.0373124	0.695419		24.4057	1.30789	0.910173	0.0535896	0.695908		0.0535896	0.0372934	0.695908
24	36.3047	2.00712	1.41131	0.0552853	0.703152		0.0552853	0.038874	0.703152		23.4674	1.25523	0.873745	0.0534883	0.696084		0.0534883	0.0372323	0.696084
25	37.7339	2.11068	1.47265	0.0559358	0.697714		0.0559358	0.0390272	0.697714		22.9699	1.22766	0.854329	0.0534462	0.695903		0.0534462	0.0371933	0.695903
26	33.9208	1.83885	1.2787	0.0542099	0.695384		0.0542099	0.0376967	0.695384		23.7539	1.27354	0.88641	0.0536139	0.69602		0.0536139	0.0373164	0.69602
27	34.1634	1.84663	1.2843	0.0540527	0.695482		0.0540527	0.0375927	0.695482		22.0229	1.26459	0.888485	0.0574214	0.70259		0.0574214	0.0403437	0.70259
28	33.969	1.82606	1.27018	0.0537567	0.695586		0.0537567	0.0373924	0.695586		22.3114	1.21666	0.847134	0.0545305	0.696281		0.0545305	0.0379686	0.696281
29	33.0415	1.79594	1.24937	0.054354	0.695664		0.054354	0.0378121	0.695664		23.9812	1.29697	0.902299	0.0540825	0.6957		0.0540825	0.0376252	0.6957
30	32.1173	1.73169	1.20452	0.0539178	0.695575		0.0539178	0.0375039	0.695575		22.3827	1.22516	0.852432	0.0547368	0.695773		0.0547368	0.0380844	0.695773
31	30.7418	1.6476	1.14614	0.0535949	0.695641		0.0535949	0.0372828	0.695641		21.8056	1.18292	0.823495	0.0542486	0.696152		0.0542486	0.0377653	0.696152
32	32.9552	1.82277	1.26768	0.0553106	0.695468		0.0553106	0.0384668	0.695468		22.2199	1.18694	0.825969	0.0534182	0.695879		0.0534182	0.0371726	0.695879
33	32.8537	1.76792	1.22957	0.0538119	0.69549		0.0538119	0.0374256	0.69549		22.218	1.18502	0.824959	0.0533363	0.696154		0.0533363	0.0371303	0.696154
34	34.9808	1.8898	1.31475	0.054024	0.69571		0.054024	0.0375851	0.69571		22.9075	1.22433	0.85224	0.0534466	0.696087		0.0534466	0.0372035	0.696087
35	35.5699	1.9546	1.35902	0.0549509	0.695295		0.0549509	0.0382071	0.695295		23.8515	1.28093	0.891391	0.0537043	0.695896		0.0537043	0.0373726	0.695896
36	34.0631	1.86245	1.2951	0.0546763	0.695376		0.0546763	0.0380206	0.695376		22.4196	1.27237	0.88538	0.0567523	0.695853		0.0567523	0.0394913	0.695853
37	34.2537	1.84017	1.28075	0.0537219	0.695995		0.0537219	0.0373902	0.695995		22.355	1.21688	0.846473	0.0544343	0.695611		0.0544343	0.0378651	0.695611
38	41.4711	2.37394	1.65403	0.0572434	0.696744		0.0572434	0.039884	0.696744		23.8611	1.27627	0.887984	0.0534875	0.695764		0.0534875	0.0372147	0.695764
39	34.6339	1.95571	1.37806	0.056468	0.704636		0.056468	0.0397894	0.704636		28.8245	1.63627	1.13895	0.0567666	0.696061		0.0567666	0.039513	0.696061
40	34.7588	1.88168	1.30879	0.0541354	0.695542		0.0541354	0.0376534	0.695542		26.9484	1.53238	1.06524	0.0568634	0.695154		0.0568634	0.0395288	0.695154
41	37.4319	2.02768	1.41043	0.0541699	0.69559		0.0541699	0.03768	0.69559		25.3457	1.43363	0.997072	0.0565631	0.695488		0.0565631	0.039339	0.695488
42	30.5632	1.64239	1.142	0.0537375	0.695332		0.0537375	0.0373654	0.695332		23.673	1.28883	0.897057	0.0544429	0.696027		0.0544429	0.0378937	0.696027
43	28.9383	1.63701	1.13831	0.0565689	0.695359		0.0565689	0.0393357	0.695359		22.5391	1.23519	0.85956	0.0548019	0.695895		0.0548019	0.0381363	0.695895
44	31.1819	1.69167	1.1769	0.0542516	0.695707		0.0542516	0.0377432	0.695707		24.8187	1.32603	0.922898	0.0534288	0.695984		0.0534288	0.0371856	0.695984
45	26.4356	1.43086	0.99542	0.0541265	0.695678		0.0541265	0.0376546	0.695678		26.812	1.46865	1.02182	0.0547757	0.695757		0.0547757	0.0381106	0.695757
46	27.8086	1.57538	1.09665	0.0566506	0.696117		0.0566506	0.0394354	0.696117		27.7999	1.63109	1.13435	0.0586724	0.695456		0.0586724	0.040804	0.695456
47	26.2783	1.42538	0.991658	0.0542418	0.695714		0.0542418	0.0377368	0.695714		22.6148	1.2061	0.839414	0.0533322	0.695974		0.0533322	0.0371178	0.695974
48	23.1537	1.24122	0.86357	0.0536076	0.695745		0.0536076	0.0372972	0.695745		22.2475	1.18825	0.826673	0.0534107	0.695704		0.0534107	0.037158	0.695704
49	25.5133	1.39422	0.97028	0.0546467	0.695931		0.0546467	0.0380303	0.695931		27.4788	1.488	1.03526	0.0541507	0.695743		0.0541507	0.0376749	0.695743
50	23.9813	1.3133	0.913801	0.0547634	0.695807		0.0547634	0.0381047	0.695807		27.9797	1.50946	1.05041	0.0539482	0.695885		0.0539482	0.0375418	0.695885
51	22.2228	1.2113	0.842874	0.0545072	0.695841		0.0545072	0.0379284	0.695841		25.603	1.38351	0.962671	0.0540371	0.695817		0.0540371	0.0375999	0.695817
52	23.6293	1.28685	0.895304	0.05446	0.695731		0.05446	0.0378896	0.695731		21.7851	1.21733	0.846981	0.0558792	0.695767		0.0558792	0.0388789	0.695767
53	27.0731	1.46569	1.0198	0.0541384	0.695778		0.0541384	0.0376683	0.695778		23.4424	1.30874	0.910416	0.0558279	0.695643		0.0558279	0.0388363	0.695643
54	23.6721	1.3007	0.905044	0.0549466	0.695813		0.0549466	0.0382325	0.695813		21.6419	1.1535	0.802953	0.0532996	0.696099		0.0532996	0.0371018	0.696099
55	23.426	1.27695	0.888281	0.0545097	0.695629		0.0545097	0.0379185	0.695629		23.0153	1.23379	0.858545	0.0536071	0.695862		0.0536071	0.0373032	0.695862
56	22.1345	1.18693	0.826112	0.0536233	0.696008		0.0536233	0.0373223	0.696008		23.385	1.27726	0.888881	0.0546189	0.695928		0.0546189	0.0380108	0.695928
57	25.1258	1.46747	1.02061	0.0584048	0.695492		0.0584048	0.0406201	0.695492		22.4153	1.30654	0.908263	0.0582877	0.695169		0.0582877	0.0405198	0.695169
58	22.6864	1.23064	0.856407	0.0542458	0.695904		0.0542458	0.0377499	0.695904		21.3934	1.20507	0.83849	0.0563288	0.695803		0.0563288	0.0391938	0.695803
59	22.6006	1.24145	0.864037	0.0549302	0.695989		0.0549302	0.0382308	0.695989		22.3651	1.19234	0.829798	0.0533127	0.695939		0.0533127	0.0371024	0.695939
60	23.1037	1.265	0.880065	0.0547529	0.695706		0.0547529	0.0380919	0.695706		27.2097	1.49929	1.04275	0.0551014	0.695499		0.0551014	0.038323	0.695499
***	22.4701	1.20287	0.837275	0.0535319	0.696066						L4	C	H4	C | L4	H4 | C
***	L4	C	H4	C | L4	H4 | C						tbdgy	tbdgy	tbdgy	tbdgy - St	tbdgy - St
***	tbdgy	tbdgy	tbdgy	tbdgy - St	tbdgy - St	av	0.0545053	0.0392905	0.721594		21.4721	1.17755	0.819688	0.0567697	0.710202	av	0.0567697	0.0403117	0.710202
***	28.6506	1.56641	1.09039	0.0544891	0.721168	stabw	0.00104277	0.00418733	0.084587		4.63858	4.63726	4.63041	3.28183	1.03742	stabw	0.0144314	0.0107218	0.0570705
***	5.15783	5.18003	5.17709	0.246761	1.5025	stabw/(n)^0.5	0.000135758	0.000545144	0.0110123		0.996003	0.0546062	0.0379549	0.00186309	0.00736777	stabw/(n)^0.5	0.00186309	0.00138417	0.00736777
***	1.47775	0.0811407	0.0564504	0.000134458	0.0108355	(stabw/(n)^0.5)/av /%	0.00249072	0.0138747	0.0152611		35.9303	35.92	35.867	25.421	8.03582	(stabw/(n)^0.5)/av /%	0.0328183	0.0343367	0.0103742
***	39.9524	40.1244	40.1016	1.91141	11.6383						7.715	0.422978	0.293997	0.0144314	0.0570705
	11.4466	0.628514	0.437263	0.00104151	0.0839318
	WASO04 Laserablation 450 mL/min
	1st run						not blank corr				2nd run						not blank corr				3rd run						not blank corr
Cycle	27.94	28.925	29.916	28.925/27.94 (1)	29.916/28.925 (2)		29/28	30/28	30/29		27.94	28.925	29.916	28.925/27.94 (1)	29.916/28.925 (2)		29/28	30/28	30/29		27.94	28.925	29.916	28.925/27.94 (1)	29.916/28.925 (2)		29/28	30/28	30/29
1	0.0698819	0.00369254	0.00393487	0.0528397	1.06563		0.0528397	0.0563074	1.06563		0.0770291	0.00407299	0.0041085	0.0528761	1.00872		0.0528761	0.053337	1.00872		0.0774381	0.00416745	0.00407906	0.0538165	0.97879		0.0538165	0.052675	0.97879
2	0.0711119	0.00376356	0.00383288	0.0529245	1.01842		0.0529245	0.0538992	1.01842		0.076464	0.00405239	0.00393132	0.0529973	0.970126		0.0529973	0.0514141	0.970126		0.0766698	0.0041211	0.0040996	0.0537513	0.994783		0.0537513	0.0534709	0.994783
3	0.0702388	0.00374733	0.00387473	0.0533513	1.034		0.0533513	0.0551651	1.034		0.0745727	0.00395373	0.00392711	0.0530185	0.993266		0.0530185	0.0526615	0.993266		0.236661	0.0125686	0.0100087	0.053108	0.796324		0.053108	0.0422912	0.796324
4	0.0691984	0.00366493	0.00376247	0.0529626	1.02661		0.0529626	0.0543722	1.02661		0.0748414	0.00396008	0.00406498	0.052913	1.02649		0.052913	0.0543145	1.02649		0.0812786	0.00435897	0.00418963	0.0536299	0.961152		0.0536299	0.0515465	0.961152
5	0.0754455	0.00396641	0.00408242	0.0525732	1.02925		0.0525732	0.0541108	1.02925		0.082928	0.00440536	0.00428215	0.0531227	0.972032		0.0531227	0.051637	0.972032		0.0787227	0.00419613	0.00413078	0.0533027	0.984425		0.0533027	0.0524725	0.984425
6	14.6451	0.78633	0.548542	0.0536923	0.697598		0.0536923	0.0374556	0.697598		7.98355	0.431526	0.301246	0.054052	0.698095		0.054052	0.0377334	0.698095		6.02501	0.319904	0.224086	0.0530959	0.70048		0.0530959	0.0371926	0.70048
7	46.3013	2.62557	1.82516	0.0567061	0.695149		0.0567061	0.0394192	0.695149		27.8573	1.49494	1.04009	0.0536642	0.695738		0.0536642	0.0373362	0.695738		21.0572	1.12125	0.780459	0.0532479	0.696062		0.0532479	0.0370638	0.696062
8	50.7016	3.14853	2.18788	0.0620992	0.69489		0.0620992	0.0431521	0.69489		35.9763	1.92643	1.33927	0.0535472	0.695208		0.0535472	0.0372264	0.695208		28.9204	1.54422	1.07393	0.0533954	0.695453		0.0533954	0.037134	0.695453
9	49.9346	2.87982	2.00106	0.0576718	0.694854		0.0576718	0.0400735	0.694854		33.8942	1.80498	1.25515	0.0532534	0.695384		0.0532534	0.0370316	0.695384		27.9718	1.53778	1.06941	0.0549762	0.695425		0.0549762	0.0382318	0.695425
10	45.084	2.45588	1.70646	0.0544735	0.694844		0.0544735	0.0378506	0.694844		30.4181	1.6703	1.16109	0.0549114	0.695135		0.0549114	0.0381709	0.695135		26.8505	1.43038	0.994538	0.0532722	0.695294		0.0532722	0.0370399	0.695294
11	43.169	2.32816	1.61775	0.0539312	0.694861		0.0539312	0.0374747	0.694861		33.2864	1.86859	1.29895	0.0561368	0.69515		0.0561368	0.0390235	0.69515		27.5769	1.4786	1.02859	0.0536172	0.695656		0.0536172	0.0372991	0.695656
12	40.6931	2.19498	1.52541	0.0539398	0.694954		0.0539398	0.0374857	0.694954		29.1392	1.559	1.08363	0.0535018	0.695085		0.0535018	0.0371883	0.695085		25.4784	1.36531	0.949444	0.053587	0.695405		0.053587	0.0372647	0.695405
13	43.9575	2.36409	1.64344	0.0537813	0.695169		0.0537813	0.0373871	0.695169		29.4353	1.6001	1.11236	0.05436	0.695178		0.05436	0.0377899	0.695178		28.7707	1.53749	1.06933	0.0534394	0.695504		0.0534394	0.0371674	0.695504
14	44.4972	2.39203	1.66214	0.0537569	0.694864		0.0537569	0.0373537	0.694864		26.0877	1.40013	0.973781	0.0536701	0.695494		0.0536701	0.0373272	0.695494		30.3	1.74814	1.21504	0.0576945	0.695044		0.0576945	0.0401002	0.695044
15	38.9142	2.13361	1.48263	0.0548286	0.694891		0.0548286	0.0380999	0.694891		27.1251	1.45849	1.01379	0.0537691	0.695094		0.0537691	0.0373746	0.695094		29.5438	1.57893	1.09801	0.0534436	0.695412		0.0534436	0.0371653	0.695412
16	47.4877	2.61013	1.81377	0.0549644	0.694896		0.0549644	0.0381945	0.694896		28.8178	1.53795	1.06939	0.0533682	0.695332		0.0533682	0.0371086	0.695332		27.773	1.48117	1.02983	0.0533313	0.695284		0.0533313	0.0370804	0.695284
17	45.1394	2.41318	1.67706	0.0534606	0.694959		0.0534606	0.0371529	0.694959		29.5338	1.5771	1.09651	0.0533999	0.695266		0.0533999	0.0371271	0.695266		28.7239	1.54273	1.07253	0.0537091	0.695213		0.0537091	0.0373392	0.695213
18	45.8116	2.5017	1.7383	0.0546084	0.694847		0.0546084	0.0379445	0.694847		30.4956	1.62655	1.1309	0.0533373	0.695275		0.0533373	0.0370841	0.695275		26.2348	1.46781	1.0211	0.0559491	0.695657		0.0559491	0.0389214	0.695657
19	46.9704	2.51727	1.74908	0.0535927	0.694833		0.0535927	0.037238	0.694833		30.4233	1.6254	1.13024	0.053426	0.695363		0.053426	0.0371505	0.695363		27.5376	1.59327	1.10747	0.057858	0.695094		0.057858	0.0402168	0.695094
20	47.1296	2.54036	1.76497	0.0539015	0.694772		0.0539015	0.0374493	0.694772		30.4684	1.62696	1.13108	0.0533983	0.695212		0.0533983	0.0371231	0.695212		26.1382	1.3936	0.969136	0.0533165	0.695421		0.0533165	0.0370774	0.695421
21	43.8079	2.35748	1.63832	0.053814	0.694947		0.053814	0.0373979	0.694947		33.7208	1.82255	1.26689	0.0540483	0.695119		0.0540483	0.0375701	0.695119		25.9003	1.47066	1.0222	0.0567814	0.69506		0.0567814	0.0394665	0.69506
22	46.1724	2.46736	1.7146	0.0534381	0.694912		0.0534381	0.0371347	0.694912		34.1171	1.88104	1.30705	0.0551348	0.694858		0.0551348	0.0383108	0.694858		21.7819	1.16305	0.808854	0.0533951	0.695461		0.0533951	0.0371342	0.695461
23	45.2598	2.41852	1.68041	0.0534364	0.694807		0.0534364	0.037128	0.694807		32.6948	1.78198	1.23875	0.0545035	0.695156		0.0545035	0.0378884	0.695156		21.4085	1.14648	0.797506	0.0535526	0.695613		0.0535526	0.0372519	0.695613
24	46.6528	2.50378	1.73964	0.0536685	0.694804		0.0536685	0.0372891	0.694804		32.1565	1.71416	1.19146	0.0533067	0.695072		0.0533067	0.037052	0.695072		22.3644	1.22483	0.852242	0.0547668	0.695806		0.0547668	0.0381071	0.695806
25	43.5326	2.32294	1.61413	0.0533609	0.694866		0.0533609	0.0370787	0.694866		33.9866	1.81052	1.25851	0.0532716	0.695109		0.0532716	0.0370296	0.695109		21.8434	1.26209	0.876862	0.0577789	0.694769		0.0577789	0.040143	0.694769
26	40.4431	2.18936	1.52126	0.0541345	0.694843		0.0541345	0.037615	0.694843		34.2983	1.84315	1.28138	0.0537387	0.695211		0.0537387	0.0373597	0.695211		21.1055	1.12409	0.781862	0.0532606	0.695549		0.0532606	0.0370453	0.695549
27	36.8473	2.02587	1.4075	0.0549802	0.694765		0.0549802	0.0381983	0.694765		34.5398	1.84939	1.28524	0.0535439	0.694954		0.0535439	0.0372105	0.694954		22.8467	1.22176	0.849736	0.0534762	0.695504		0.0534762	0.0371929	0.695504
28	39.1189	2.1144	1.46922	0.0540507	0.694861		0.0540507	0.0375577	0.694861		29.6225	1.66236	1.15868	0.0561183	0.697009		0.0561183	0.0391149	0.697009		21.0771	1.12312	0.781262	0.0532863	0.695617		0.0532863	0.0370669	0.695617
29	36.6512	1.95809	1.36073	0.0534251	0.694928		0.0534251	0.0371266	0.694928		31.2574	1.83057	1.27555	0.0585643	0.696803		0.0585643	0.0408078	0.696803		22.7659	1.21503	0.845367	0.0533705	0.69576		0.0533705	0.0371331	0.69576
30	43.4022	2.33714	1.62395	0.0538484	0.694844		0.0538484	0.0374162	0.694844		28.1063	1.5412	1.07139	0.0548347	0.695163		0.0548347	0.0381191	0.695163		23.3775	1.38937	0.965589	0.0594317	0.694986		0.0594317	0.0413042	0.694986
31	44.4084	2.39598	1.66415	0.0539533	0.69456		0.0539533	0.0374738	0.69456		27.5553	1.46867	1.02079	0.0532989	0.695042		0.0532989	0.037045	0.695042		20.2581	1.08059	0.751358	0.0533412	0.695321		0.0533412	0.0370892	0.695321
32	38.1346	2.03242	1.4118	0.053296	0.694641		0.053296	0.0370216	0.694641		28.4742	1.5167	1.05468	0.0532659	0.695379		0.0532659	0.03704	0.695379		19.3049	1.0693	0.743582	0.0553901	0.695389		0.0553901	0.0385177	0.695389
33	36.3455	1.93897	1.34792	0.0533483	0.695173		0.0533483	0.0370863	0.695173		29.5382	1.57385	1.0941	0.0532819	0.695177		0.0532819	0.0370403	0.695177		19.1363	1.05266	0.732117	0.0550087	0.695492		0.0550087	0.0382581	0.695492
34	41.2343	2.21901	1.54202	0.0538147	0.694911		0.0538147	0.0373965	0.694911		27.0388	1.54247	1.07191	0.0570464	0.694931		0.0570464	0.0396433	0.694931		20.5828	1.0959	0.762308	0.0532434	0.695601		0.0532434	0.0370361	0.695601
35	42.2285	2.25373	1.56609	0.0533699	0.694889		0.0533699	0.0370861	0.694889		26.5004	1.43636	0.998559	0.0542014	0.695201		0.0542014	0.0376809	0.695201		23.375	1.24485	0.865806	0.0532559	0.695508		0.0532559	0.0370399	0.695508
36	39.1332	2.12512	1.47629	0.0543048	0.694686		0.0543048	0.0377248	0.694686		27.0226	1.44009	1.00127	0.053292	0.695286		0.053292	0.0370532	0.695286		22.3947	1.1925	0.829242	0.0532493	0.695379		0.0532493	0.0370284	0.695379
37	41.4172	2.21406	1.53848	0.0534575	0.694871		0.0534575	0.0371461	0.694871		27.9777	1.50007	1.04285	0.0536167	0.695199		0.0536167	0.0372743	0.695199		23.1418	1.23327	0.857957	0.0532919	0.695676		0.0532919	0.0370739	0.695676
38	41.7361	2.3847	1.65622	0.0571377	0.694519		0.0571377	0.0396832	0.694519		25.0972	1.34222	0.933304	0.0534807	0.695344		0.0534807	0.0371875	0.695344		22.618	1.20461	0.837586	0.0532588	0.695318		0.0532588	0.0370318	0.695318
39	32.4243	1.73035	1.20241	0.0533659	0.694895		0.0533659	0.0370837	0.694895		25.9597	1.38607	0.963901	0.053393	0.695422		0.053393	0.0371307	0.695422		20.9425	1.13509	0.789241	0.0542002	0.695311		0.0542002	0.037686	0.695311
40	32.3769	1.73466	1.20551	0.0535773	0.694955		0.0535773	0.0372338	0.694955		32.5713	2.09068	1.45344	0.0641879	0.6952		0.0641879	0.0446234	0.6952		23.4615	1.3907	0.966486	0.0592758	0.694964		0.0592758	0.0411946	0.694964
41	30.9967	1.65049	1.14704	0.0532472	0.694971		0.0532472	0.0370053	0.694971		31.5385	1.82076	1.26344	0.0577313	0.693907		0.0577313	0.0400602	0.693907		22.045	1.2243	0.851044	0.0555365	0.695127		0.0555365	0.0386049	0.695127
42	36.7408	1.95829	1.36092	0.0533002	0.694952		0.0533002	0.037041	0.694952		29.1102	1.57077	1.09201	0.0539595	0.695205		0.0539595	0.0375129	0.695205		19.0804	1.02346	0.711574	0.0536392	0.695264		0.0536392	0.0372934	0.695264
43	33.5123	1.79351	1.24653	0.0535179	0.695023		0.0535179	0.0371962	0.695023		28.2583	1.56963	1.09077	0.0555457	0.694923		0.0555457	0.0386	0.694923		18.6115	1.02817	0.714866	0.0552438	0.69528		0.0552438	0.0384099	0.69528
44	30.9858	1.69213	1.17547	0.0546099	0.694668		0.0546099	0.0379357	0.694668		27.3525	1.54103	1.07138	0.0563395	0.695234		0.0563395	0.0391692	0.695234		19.1282	1.02084	0.710032	0.0533685	0.695533		0.0533685	0.0371196	0.695533
45	34.7911	1.87579	1.30362	0.0539157	0.694973		0.0539157	0.03747	0.694973		29.6481	1.63209	1.13434	0.055049	0.695021		0.055049	0.0382602	0.695021		21.1125	1.13788	0.79142	0.0538962	0.695519		0.0538962	0.0374859	0.695519
46	31.5008	1.69391	1.17723	0.0537735	0.694976		0.0537735	0.0373713	0.694976		29.3223	1.56222	1.08565	0.0532776	0.694937		0.0532776	0.0370246	0.694937		21.7266	1.16992	0.813495	0.0538472	0.695344		0.0538472	0.0374423	0.695344
47	35.7731	1.90923	1.32707	0.0533705	0.695082		0.0533705	0.0370969	0.695082		27.3964	1.48648	1.0334	0.0542581	0.695203		0.0542581	0.0377204	0.695203		20.7802	1.18386	0.831809	0.0569706	0.702623		0.0569706	0.0400288	0.702623
48	35.8114	1.90873	1.32622	0.0532995	0.694818		0.0532995	0.0370335	0.694818		29.7891	1.66268	1.16312	0.0558151	0.699546		0.0558151	0.0390452	0.699546		19.056	1.0144	0.705658	0.0532329	0.695639		0.0532329	0.0370308	0.695639
49	37.0578	1.9871	1.38157	0.0536218	0.695268		0.0536218	0.0372815	0.695268		27.731	1.47878	1.02795	0.0533258	0.695137		0.0533258	0.0370687	0.695137		19.3807	1.03173	0.717629	0.053235	0.695558		0.053235	0.037028	0.695558
50	35.1374	1.92932	1.34078	0.0549079	0.694951		0.0549079	0.0381583	0.694951		30.5803	1.89735	1.32066	0.0620449	0.696051		0.0620449	0.0431864	0.696051		20.8566	1.14028	0.792939	0.0546723	0.695391		0.0546723	0.0380186	0.695391
51	34.455	1.85311	1.28759	0.0537836	0.694826		0.0537836	0.0373702	0.694826		27.7967	1.48131	1.02955	0.053291	0.695023		0.053291	0.0370385	0.695023		20.8213	1.11001	0.772131	0.0533112	0.695607		0.0533112	0.0370837	0.695607
52	31.1367	1.6609	1.15428	0.0533424	0.694972		0.0533424	0.0370715	0.694972		28.9795	1.62412	1.12849	0.0560438	0.694834		0.0560438	0.0389412	0.694834		19.4766	1.08175	0.752196	0.0555411	0.695349		0.0555411	0.0386204	0.695349
53	33.0477	1.75979	1.22315	0.0532499	0.695056		0.0532499	0.0370117	0.695056		24.9306	1.3273	0.922776	0.0532398	0.695228		0.0532398	0.0370138	0.695228		18.4607	0.983059	0.683739	0.0532514	0.695522		0.0532514	0.0370375	0.695522
54	34.3327	1.8317	1.27271	0.0533516	0.694825		0.0533516	0.03707	0.694825		25.0274	1.33901	0.931081	0.0535018	0.695351		0.0535018	0.0372025	0.695351		18.5845	0.992449	0.69038	0.0534019	0.695632		0.0534019	0.0371481	0.695632
55	34.7759	1.8532	1.28799	0.0532899	0.69501		0.0532899	0.037037	0.69501		26.7509	1.44815	1.00664	0.0541344	0.695124		0.0541344	0.0376301	0.695124		19.9145	1.06338	0.739637	0.0533974	0.695551		0.0533974	0.0371406	0.695551
56	36.4532	1.97601	1.37291	0.0542068	0.694787		0.0542068	0.0376622	0.694787		26.8612	1.43115	0.994771	0.0532796	0.695083		0.0532796	0.0370338	0.695083		21.2502	1.14546	0.796487	0.0539032	0.695345		0.0539032	0.0374814	0.695345
57	34.4767	1.85242	1.28704	0.0537294	0.694788		0.0537294	0.0373306	0.694788		26.2456	1.40316	0.975125	0.0534626	0.694951		0.0534626	0.0371539	0.694951		19.7281	1.16085	0.807164	0.0588424	0.695322		0.0588424	0.0409144	0.695322
58	34.5053	1.8384	1.2777	0.0532788	0.695004		0.0532788	0.037029	0.695004		26.8161	1.43529	0.99801	0.0535235	0.695337		0.0535235	0.0372168	0.695337		20.4527	1.09186	0.759263	0.0533848	0.695384		0.0533848	0.0371229	0.695384
59	30.8874	1.65852	1.15252	0.0536958	0.694908		0.0536958	0.0373136	0.694908		27.3371	1.46028	1.01511	0.0534176	0.695144		0.0534176	0.037133	0.695144		21.7136	1.16377	0.80946	0.0535963	0.695551		0.0535963	0.0372789	0.695551
60	27.9062	1.48587	1.03314	0.0532451	0.69531		0.0532451	0.0370219	0.69531		28.5279	1.52128	1.05747	0.0533261	0.695118		0.0533261	0.0370679	0.695118		22.033	1.18803	0.826284	0.0539205	0.695506		0.0539205	0.0375021	0.695506
***	L4	C	H4	C | L4	H4 | C						L4	C	H4	C | L4	H4 | C						L4	C	H4	C | L4	H4 | C
***	tbdgy	tbdgy	tbdgy	tbdgy - St	tbdgy - St						tbdgy	tbdgy	tbdgy	tbdgy - St	tbdgy - St						tbdgy	tbdgy	tbdgy	tbdgy - St	tbdgy - St
***	35.6067	1.93005	1.34132	0.0540096	0.723269	av	0.0540096	0.0390329	0.723269		26.5594	1.44926	1.00782	0.0543903	0.720261	av	0.0543903	0.0391403	0.720261		20.5559	1.11942	0.77873	0.0543392	0.716267	av	0.0543392	0.0389057	0.716267
***	4.53609	4.63564	4.63136	0.336385	1.69276	stabw	0.00140729	0.00488492	0.0948356		4.32612	4.39507	4.3904	0.487457	1.49684	stabw	0.00205369	0.00435883	0.0835102		4.57663	4.62306	4.61546	0.395587	1.30277	stabw	0.00166506	0.00389561	0.0722802
***	1.61515	0.08947	0.0621214	0.00018168	0.0122432	stabw/(n)^0.5	0.00018168	0.00063064	0.0122432		1.14899	0.0636962	0.0442473	0.00026513	0.0107811	stabw/(n)^0.5	0.00026513	0.000562723	0.0107811		0.940767	0.0517516	0.035942	0.000214959	0.00933133	stabw/(n)^0.5	0.000214959	0.000502921	0.00933133
***	35.1364	35.9075	35.8743	2.60562	13.1121	(stabw/(n)^0.5)/av /%	0.00336385	0.0161567	0.0169276		33.51	34.0441	34.0079	3.77583	11.5944	(stabw/(n)^0.5)/av /%	0.00487457	0.0143771	0.0149684		35.4504	35.81	35.7512	3.06421	10.0912	(stabw/(n)^0.5)/av /%	0.00395587	0.0129267	0.0130277
***	12.5109	0.693031	0.48119	0.00140729	0.0948356						8.90005	0.493389	0.342738	0.00205369	0.0835102						7.28715	0.400866	0.278405	0.00166506	0.0722802
	WASO04 Laserablation 500 mL/min
	1st run						not blank corr				2nd run						not blank corr				3rd run						not blank corr
Cycle	27.94	28.925	29.916	28.925/27.94 (1)	29.916/28.925 (2)		29/28	30/28	30/29		27.94	28.925	29.916	28.925/27.94 (1)	29.916/28.925 (2)		29/28	30/28	30/29		27.94	28.925	29.916	28.925/27.94 (1)	29.916/28.925 (2)		29/28	30/28	30/29
1	0.0624019	0.00334041	0.00498239	0.0535306	1.49155		0.0535306	0.0798435	1.49155		0.0633665	0.00340197	0.0049636	0.0536872	1.45903		0.0536872	0.0783315	1.45903		0.13262	0.00707315	0.00750104	0.0533339	1.06049		0.0533339	0.0565602	1.06049
2	0.0679846	0.00361388	0.00508647	0.0531574	1.40748		0.0531574	0.074818	1.40748		0.0644279	0.0034328	0.00493241	0.0532813	1.43685		0.0532813	0.0765571	1.43685		0.0640313	0.00345785	0.00492478	0.0540025	1.42423		0.0540025	0.0769121	1.42423
3	0.0627409	0.00334705	0.0050232	0.0533472	1.50078		0.0533472	0.0800625	1.50078		0.0618472	0.00329249	0.00499989	0.0532358	1.51858		0.0532358	0.0808426	1.51858		0.0638051	0.00340415	0.00492288	0.0533523	1.44614		0.0533523	0.077155	1.44614
4	0.0754746	0.00400783	0.00551397	0.0531017	1.3758		0.0531017	0.0730574	1.3758		0.0635383	0.00332068	0.0049409	0.0522627	1.48792		0.0522627	0.0777627	1.48792		0.0653654	0.00351424	0.00515422	0.0537631	1.46666		0.0537631	0.0788523	1.46666
5	4.0958	0.217551	0.154122	0.0531158	0.708439		0.0531158	0.0376293	0.708439		2.9377	0.156049	0.111418	0.0531194	0.713995		0.0531194	0.0379269	0.713995		2.57433	0.136706	0.0978559	0.0531034	0.715814		0.0531034	0.0380121	0.715814
6	28.7989	1.5557	1.08437	0.0540196	0.697029		0.0540196	0.0376532	0.697029		21.6387	1.15087	0.802819	0.0531856	0.697579		0.0531856	0.0371011	0.697579		22.3954	1.19393	0.832266	0.0533117	0.697079		0.0533117	0.0371624	0.697079
7	47.6399	2.68113	1.86473	0.0562791	0.695502		0.0562791	0.0391422	0.695502		42.1389	2.24326	1.56114	0.0532349	0.695924		0.0532349	0.0370474	0.695924		36.7411	1.95621	1.36172	0.0532431	0.696101		0.0532431	0.0370626	0.696101
8	49.9288	3.09168	2.15014	0.0619217	0.695459		0.0619217	0.043064	0.695459		46.4396	2.53035	1.75996	0.0544868	0.695543		0.0544868	0.0378979	0.695543		41.4677	2.21006	1.53765	0.053296	0.69575		0.053296	0.0370807	0.69575
9	48.2424	2.66046	1.85019	0.0551478	0.695439		0.0551478	0.038352	0.695439		42.758	2.32404	1.61657	0.0543532	0.695588		0.0543532	0.0378074	0.695588		39.4149	2.10517	1.46435	0.0534105	0.695597		0.0534105	0.0371522	0.695597
10	46.4852	2.5368	1.76437	0.0545721	0.695512		0.0545721	0.0379555	0.695512		37.6905	2.01901	1.40486	0.0535682	0.695814		0.0535682	0.0372735	0.695814		38.7886	2.09796	1.45935	0.0540872	0.695603		0.0540872	0.0376232	0.695603
11	48.8908	2.79709	1.94508	0.057211	0.695394		0.057211	0.0397842	0.695394		40.0143	2.13969	1.48873	0.0534731	0.695768		0.0534731	0.0372049	0.695768		37.7049	2.00872	1.39735	0.0532749	0.69564		0.0532749	0.0370601	0.69564
12	48.9795	2.86068	1.98868	0.0584056	0.695176		0.0584056	0.0406022	0.695176		40.7117	2.18228	1.51794	0.0536032	0.695576		0.0536032	0.0372851	0.695576		41.7307	2.32985	1.62101	0.0558306	0.695756		0.0558306	0.0388445	0.695756
13	46.9819	2.61603	1.81888	0.0556817	0.695283		0.0556817	0.0387146	0.695283		41.8209	2.24553	1.56166	0.0536938	0.695452		0.0536938	0.0373415	0.695452		41.6227	2.25154	1.56551	0.0540941	0.695304		0.0540941	0.0376119	0.695304
14	40.0634	2.15457	1.49854	0.0537789	0.695519		0.0537789	0.0374043	0.695519		39.6342	2.11663	1.47209	0.0534042	0.695487		0.0534042	0.0371419	0.695487		43.2657	2.32517	1.61668	0.0537418	0.695295		0.0537418	0.0373664	0.695295
15	42.6797	2.29936	1.59951	0.053875	0.695629		0.053875	0.037477	0.695629		40.3269	2.14731	1.49365	0.0532477	0.695591		0.0532477	0.0370386	0.695591		39.2387	2.11068	1.46821	0.0537907	0.695608		0.0537907	0.0374173	0.695608
16	40.3047	2.15662	1.50008	0.0535078	0.695571		0.0535078	0.0372185	0.695571		34.6466	1.86395	1.29663	0.0537989	0.695633		0.0537989	0.0374243	0.695633		40.3375	2.25441	1.56728	0.0558887	0.695206		0.0558887	0.0388542	0.695206
17	44.4246	2.36745	1.64653	0.0532914	0.695489		0.0532914	0.0370636	0.695489		38.4004	2.05276	1.42796	0.0534568	0.69563		0.0534568	0.0371862	0.69563		40.2568	2.22063	1.54428	0.0551617	0.695424		0.0551617	0.0383608	0.695424
18	45.3642	2.47973	1.7241	0.0546627	0.695278		0.0546627	0.0380058	0.695278		38.3641	2.04478	1.42254	0.0532994	0.695694		0.0532994	0.03708	0.695694		42.8498	2.41086	1.67901	0.056263	0.696436		0.056263	0.0391836	0.696436
19	43.7902	2.35874	1.6403	0.0538645	0.695413		0.0538645	0.0374581	0.695413		43.0785	2.3012	1.60047	0.0534188	0.695492		0.0534188	0.0371523	0.695492		41.5915	2.21899	1.54306	0.053352	0.695389		0.053352	0.0371004	0.695389
20	45.0344	2.4301	1.68964	0.0539611	0.695293		0.0539611	0.0375188	0.695293		43.9417	2.44216	1.69774	0.0555773	0.695179		0.0555773	0.0386362	0.695179		43.5589	2.37663	1.65272	0.0545613	0.695407		0.0545613	0.0379423	0.695407
21	44.8229	2.42482	1.68581	0.0540977	0.695232		0.0540977	0.0376105	0.695232		43.1272	2.31271	1.60788	0.0536253	0.695235		0.0536253	0.0372822	0.695235		41.5696	2.30475	1.60988	0.0554431	0.698507		0.0554431	0.0387274	0.698507
22	43.4936	2.39188	1.66315	0.0549937	0.695331		0.0549937	0.0382389	0.695331		38.3399	2.04883	1.42502	0.0534386	0.69553		0.0534386	0.0371681	0.69553		37.5595	2.01372	1.40052	0.053614	0.69549		0.053614	0.037288	0.69549
23	40.3693	2.15913	1.50135	0.0534846	0.695348		0.0534846	0.0371904	0.695348		32.3903	1.79473	1.24974	0.0554095	0.696335		0.0554095	0.0385836	0.696335		36.2528	1.93483	1.34528	0.0533704	0.695299		0.0533704	0.0371084	0.695299
24	42.3548	2.26116	1.57219	0.0533861	0.695304		0.0533861	0.0371196	0.695304		34.9378	1.87735	1.30603	0.0537341	0.695678		0.0537341	0.0373816	0.695678		38.7769	2.13926	1.48732	0.0551685	0.69525		0.0551685	0.0383559	0.69525
25	37.8922	2.02718	1.40976	0.0534986	0.695428		0.0534986	0.0372044	0.695428		38.3362	2.04152	1.42027	0.0532531	0.695691		0.0532531	0.0370477	0.695691		36.5995	1.96913	1.36951	0.0538021	0.695491		0.0538021	0.0374189	0.695491
26	37.686	2.01232	1.39933	0.0533969	0.695383		0.0533969	0.0371313	0.695383		44.28	2.39179	1.66364	0.0540152	0.695562		0.0540152	0.0375709	0.695562		37.5448	2.00928	1.39763	0.0535167	0.695591		0.0535167	0.0372257	0.695591
27	40.0023	2.15949	1.50156	0.0539841	0.695331		0.0539841	0.0375368	0.695331		44.0291	2.36431	1.64398	0.0536989	0.695331		0.0536989	0.0373385	0.695331		32.3492	1.72393	1.19891	0.0532912	0.695455		0.0532912	0.0370616	0.695455
28	44.0174	2.39924	1.66844	0.0545065	0.695405		0.0545065	0.0379041	0.695405		40.0681	2.24858	1.56294	0.0561189	0.695079		0.0561189	0.0390071	0.695079		33.3516	1.82442	1.26908	0.0547027	0.695604		0.0547027	0.0380514	0.695604
29	43.51	4.82062	3.38429	0.110793	0.702045		0.110793	0.077782	0.702045		31.9681	1.7098	1.18928	0.0534847	0.695565		0.0534847	0.0372021	0.695565		37.119	2.00014	1.39108	0.0538845	0.695494		0.0538845	0.0374763	0.695494
30	37.146	1.99386	1.386	0.0536762	0.695134		0.0536762	0.0373122	0.695134		35.2916	2.00525	1.3949	0.0568196	0.695621		0.0568196	0.0395249	0.695621		34.5167	1.92891	1.34161	0.0558834	0.695526		0.0558834	0.0388683	0.695526
31	32.574	1.75378	1.22028	0.0538399	0.695798		0.0538399	0.0374618	0.695798		42.7396	2.54125	1.76851	0.0594589	0.695922		0.0594589	0.0413788	0.695922		37.0577	1.9905	1.38428	0.0537136	0.695442		0.0537136	0.0373547	0.695442
32	32.6066	1.74866	1.21666	0.053629	0.695767		0.053629	0.0373133	0.695767		38.6199	2.07286	1.44145	0.0536735	0.695391		0.0536735	0.0373241	0.695391		40.2833	2.14673	1.49307	0.0532907	0.695512		0.0532907	0.0370643	0.695512
33	35.214	1.87911	1.30687	0.0533625	0.695472		0.0533625	0.0371121	0.695472		35.6284	1.9026	1.32324	0.0534012	0.695493		0.0534012	0.0371401	0.695493		36.3532	1.95695	1.3609	0.0538317	0.695417		0.0538317	0.0374355	0.695417
34	35.3224	1.88343	1.31047	0.053321	0.695789		0.053321	0.0371001	0.695789		38.4555	2.04725	1.42373	0.0532369	0.695435		0.0532369	0.0370227	0.695435		38.0112	2.02481	1.40816	0.0532688	0.695454		0.0532688	0.037046	0.695454
35	37.7201	2.08902	1.45805	0.0553821	0.697959		0.0553821	0.0386544	0.697959		41.2438	2.19599	1.52674	0.0532442	0.695239		0.0532442	0.0370175	0.695239		35.5749	1.89328	1.31725	0.0532196	0.695752		0.0532196	0.0370276	0.695752
36	38.493	2.05509	1.42938	0.0533887	0.695531		0.0533887	0.0371335	0.695531		40.6237	2.19128	1.52331	0.0539408	0.695171		0.0539408	0.0374981	0.695171		40.0821	2.13891	1.48679	0.0533632	0.695113		0.0533632	0.0370935	0.695113
37	38.3768	2.07092	1.44036	0.0539629	0.695514		0.0539629	0.037532	0.695514		41.5525	2.21127	1.53812	0.0532163	0.69558		0.0532163	0.0370162	0.69558		37.3187	2.05836	1.43152	0.0551561	0.695467		0.0551561	0.0383592	0.695467
38	39.7109	2.20081	1.52982	0.0554209	0.695116		0.0554209	0.0385239	0.695116		39.0072	2.07672	1.444	0.0532393	0.69533		0.0532393	0.0370189	0.69533		40.6671	2.189	1.5218	0.0538273	0.695204		0.0538273	0.0374209	0.695204
39	41.7765	2.23623	1.55449	0.0535284	0.695136		0.0535284	0.0372096	0.695136		35.91	1.9328	1.34451	0.0538234	0.695626		0.0538234	0.037441	0.695626		43.7916	2.38348	1.65666	0.0544277	0.695059		0.0544277	0.0378304	0.695059
40	43.093	2.33514	1.62353	0.0541884	0.695261		0.0541884	0.0376751	0.695261		35.5422	1.89218	1.31611	0.0532376	0.695551		0.0532376	0.0370294	0.695551		39.0071	2.07921	1.4456	0.0533035	0.695264		0.0533035	0.03706	0.695264
41	48.2803	2.69898	1.87582	0.0559024	0.69501		0.0559024	0.0388527	0.69501		42.9258	2.29277	1.59426	0.0534122	0.695343		0.0534122	0.0371398	0.695343		40.5282	2.16039	1.50249	0.0533058	0.695474		0.0533058	0.0370728	0.695474
42	45.4525	2.44062	1.69599	0.053696	0.6949		0.053696	0.0373134	0.6949		43.0519	2.29597	1.59626	0.0533302	0.695248		0.0533302	0.0370777	0.695248		39.3203	2.11589	1.47106	0.0538118	0.695241		0.0538118	0.0374121	0.695241
43	35.6137	2.01175	1.39857	0.0564882	0.695198		0.0564882	0.0392705	0.695198		43.5929	2.36425	1.64378	0.0542347	0.695266		0.0542347	0.0377075	0.695266		32.7921	1.8411	1.29021	0.0561445	0.700781		0.0561445	0.039345	0.700781
44	40.8347	2.18159	1.51692	0.0534249	0.695329		0.0534249	0.0371479	0.695329		37.9398	2.16281	1.51403	0.0570063	0.70003		0.0570063	0.0399061	0.70003		36.5199	2.19081	1.52323	0.0599895	0.695282		0.0599895	0.0417096	0.695282
45	40.5186	2.16346	1.50395	0.0533943	0.695159		0.0533943	0.0371175	0.695159		35.3686	1.88325	1.30981	0.0532462	0.695508		0.0532462	0.0370332	0.695508		31.7858	1.72396	1.19864	0.0542368	0.695284		0.0542368	0.03771	0.695284
46	39.6764	2.23565	1.55434	0.0563472	0.695251		0.0563472	0.0391754	0.695251		39.2058	2.08795	1.45186	0.053256	0.695352		0.053256	0.0370317	0.695352		37.9385	2.13044	1.4839	0.056155	0.696525		0.056155	0.0391134	0.696525
47	38.0178	2.03592	1.41553	0.0535518	0.695277		0.0535518	0.0372333	0.695277		37.8005	2.01613	1.40181	0.053336	0.6953		0.053336	0.0370846	0.6953		39.5827	2.10777	1.46597	0.0532498	0.695508		0.0532498	0.0370357	0.695508
48	36.9069	1.96697	1.3678	0.0532956	0.695385		0.0532956	0.0370609	0.695385		39.5174	2.40336	1.67369	0.0608178	0.696393		0.0608178	0.0423531	0.696393		38.0968	2.1221	1.47799	0.0557028	0.696476		0.0557028	0.0387957	0.696476
49	34.9306	1.91343	1.33065	0.054778	0.695427		0.054778	0.0380941	0.695427		47.4922	2.73546	1.89995	0.0575981	0.694565		0.0575981	0.0400056	0.694565		33.5089	1.80379	1.25467	0.0538303	0.695573		0.0538303	0.0374429	0.695573
50	33.5589	1.78708	1.24319	0.0532519	0.695655		0.0532519	0.037045	0.695655		41.0584	2.2052	1.53348	0.0537088	0.695393		0.0537088	0.0373487	0.695393		32.3553	1.76549	1.22794	0.0545658	0.695521		0.0545658	0.0379517	0.695521
51	33.0048	1.76506	1.22769	0.0534789	0.695552		0.0534789	0.0371973	0.695552		39.2787	2.09783	1.45867	0.053409	0.695321		0.053409	0.0371364	0.695321		31.5271	1.72517	1.20005	0.0547201	0.695616		0.0547201	0.0380642	0.695616
52	35.5491	1.95339	1.35819	0.0549492	0.6953		0.0549492	0.0382062	0.6953		42.8235	2.28718	1.59037	0.0534094	0.695342		0.0534094	0.0371378	0.695342		31.9795	1.70787	1.1879	0.0534051	0.695545		0.0534051	0.0371457	0.695545
53	42.6209	2.32783	1.61829	0.0546169	0.695192		0.0546169	0.0379693	0.695192		45.5172	2.45925	1.70987	0.0540289	0.695281		0.0540289	0.0375652	0.695281		33.6057	1.79051	1.24567	0.05328	0.695708		0.05328	0.0370674	0.695708
54	37.433	1.99899	1.39023	0.053402	0.695465		0.053402	0.0371392	0.695465		40.0175	2.13479	1.48412	0.0533464	0.695205		0.0533464	0.0370867	0.695205		33.2322	1.77696	1.23607	0.053471	0.695608		0.053471	0.0371948	0.695608
55	35.8356	2.01647	1.40236	0.05627	0.695451		0.05627	0.039133	0.695451		39.6479	2.11586	1.47095	0.0533664	0.695202		0.0533664	0.0371004	0.695202		37.0684	1.97658	1.37433	0.0533225	0.695308		0.0533225	0.0370756	0.695308
56	33.5642	1.84363	1.28116	0.0549285	0.694912		0.0549285	0.0381705	0.694912		39.5183	2.10741	1.46519	0.0533274	0.695257		0.0533274	0.0370762	0.695257		36.5604	2.04383	1.42156	0.0559028	0.695537		0.0559028	0.0388825	0.695537
57	29.9564	1.62175	1.1284	0.0541368	0.695796		0.0541368	0.0376682	0.695796		43.9706	2.35029	1.63365	0.0534514	0.695084		0.0534514	0.0371532	0.695084		33.5826	1.79646	1.24988	0.0534938	0.695745		0.0534938	0.0372181	0.695745
58	38.7389	2.16422	1.5134	0.0558668	0.69928		0.0558668	0.0390666	0.69928		42.3327	2.27964	1.58473	0.0538504	0.695168		0.0538504	0.0374351	0.695168		33.5222	1.7846	1.2412	0.0532365	0.695507		0.0532365	0.0370264	0.695507
59	35.1435	1.87253	1.30228	0.0532824	0.695466		0.0532824	0.0370561	0.695466		38.5304	2.17418	1.51097	0.0564278	0.694958		0.0564278	0.0392149	0.694958		30.6335	1.63067	1.13441	0.0532315	0.695672		0.0532315	0.0370317	0.695672
60	37.7747	2.02334	1.40685	0.0535634	0.695308		0.0535634	0.0372431	0.695308		39.761	2.15556	1.49883	0.0542129	0.695334		0.0542129	0.0376961	0.695334		31.0614	1.65272	1.15011	0.053208	0.695893		0.053208	0.0370271	0.695893
***	L4	C	H4	C | L4	H4 | C						L4	C	H4	C | L4	H4 | C						L4	C	H4	C | L4	H4 | C
***	tbdgy	tbdgy	tbdgy	tbdgy - St	tbdgy - St						tbdgy	tbdgy	tbdgy	tbdgy - St	tbdgy - St						tbdgy	tbdgy	tbdgy	tbdgy - St	tbdgy - St
***	36.8594	2.05338	1.42889	0.0553483	0.745744	av	0.0553483	0.0411788	0.745744		36.4373	1.97403	1.37326	0.0540706	0.747887	av	0.0540706	0.0403887	0.747887		34.0475	1.84636	1.28475	0.0541534	0.739636	av	0.0541534	0.0400318	0.739636
***	4.20603	4.79197	4.80064	1.7341	3.26654	stabw	0.00743456	0.0110035	0.188692		4.10656	4.14276	4.13434	0.367649	3.38864	stabw	0.00153982	0.0103002	0.196308		4.13159	4.1573	4.14921	0.289999	2.96805	stabw	0.00121646	0.00907556	0.170045
***	1.55032	0.0983972	0.0685957	0.000959797	0.02436	stabw/(n)^0.5	0.000959797	0.00142054	0.02436		1.49632	0.0817792	0.0567753	0.00019879	0.0253432	stabw/(n)^0.5	0.00019879	0.00132975	0.0253432		1.40671	0.0767588	0.0533069	0.000157045	0.0219527	stabw/(n)^0.5	0.000157045	0.00117165	0.0219527
***	32.5797	37.1185	37.1856	13.4323	25.3025	(stabw/(n)^0.5)/av /%	0.017341	0.0344969	0.0326654		31.8093	32.0897	32.0245	2.8478	26.2483	(stabw/(n)^0.5)/av /%	0.00367649	0.0329239	0.0338864		32.0032	32.2023	32.1396	2.24633	22.9904	(stabw/(n)^0.5)/av /%	0.00289999	0.0292679	0.0296805
***	12.0087	0.762182	0.53134	0.00743456	0.188692						11.5904	0.633459	0.43978	0.00153982	0.196308						10.8963	0.594571	0.412914	0.00121646	0.170045

## Sheet: He mass flow wo outlier
	Laserablation -He mass flow characterization
	solid samples		WASO04
	dissolved sample		WASO04 4 µg/g
	Neptune XT
	ESI NWR213
	without first ten data (outlier)
	WASO04 Laserablation 400 mL/min
	1st run						not blank corr				2nd run						not blank corr
Cycle	27.94	28.925	29.916	28.925/27.94 (1)	29.916/28.925 (2)		29/28	30/28	30/29		27.94	28.925	29.916	28.925/27.94 (1)	29.916/28.925 (2)		29/28	30/28	30/29
11	47.3263	2.60442	1.81128	0.0550312	0.695464		0.0550312	0.0382722	0.695464		26.9445	1.57404	1.09476	0.0584178	0.695512		0.0584178	0.0406302	0.695512
12	40.8247	2.22246	1.54532	0.054439	0.69532		0.054439	0.0378526	0.69532		24.8208	1.34114	0.932873	0.0540329	0.695582		0.0540329	0.0375843	0.695582
13	39.3189	2.13889	1.4872	0.0543986	0.695311		0.0543986	0.037824	0.695311		23.506	1.33133	0.927421	0.056638	0.696612		0.056638	0.0394547	0.696612
14	35.2542	1.92137	1.33651	0.0545004	0.695601		0.0545004	0.0379106	0.695601		25.0793	1.43543	0.999602	0.0572356	0.696378		0.0572356	0.0398576	0.696378
15	33.6596	1.82891	1.27211	0.0543354	0.695556		0.0543354	0.0377933	0.695556		22.4022	1.20051	0.835564	0.0535889	0.696008		0.0535889	0.0372983	0.696008
16	32.9313	1.80008	1.25188	0.0546618	0.695456		0.0546618	0.0380149	0.695456		22.1177	1.18645	0.825689	0.0536425	0.695934		0.0536425	0.0373316	0.695934
17	29.7715	1.61575	1.12399	0.0542718	0.695644		0.0542718	0.0377539	0.695644		20.7	1.19015	0.828127	0.0574951	0.695818		0.0574951	0.0400062	0.695818
18	30.303	1.66018	1.15455	0.0547858	0.69544		0.0547858	0.0381002	0.69544		23.6965	1.28461	0.894262	0.0542111	0.696134		0.0542111	0.0377382	0.696134
19	33.1431	1.83414	1.27565	0.0553398	0.695503		0.0553398	0.038489	0.695503		21.5707	1.21356	0.844607	0.0562598	0.695973		0.0562598	0.0391553	0.695973
20	37.9358	2.05085	1.42645	0.0540612	0.69554		0.0540612	0.0376017	0.69554		23.202	1.2516	0.870979	0.0539434	0.695895		0.0539434	0.037539	0.695895
21	37.0133	2.02667	1.40949	0.0547551	0.69547		0.0547551	0.0380805	0.69547		22.3532	1.20593	0.83913	0.053949	0.695834		0.053949	0.0375395	0.695834
22	35.1191	1.90041	1.32143	0.0541135	0.695338		0.0541135	0.0376272	0.695338		23.474	1.26868	0.883175	0.0540464	0.696136		0.0540464	0.0376236	0.696136
23	38.2023	2.04973	1.42542	0.0536546	0.695419		0.0536546	0.0373124	0.695419		24.4057	1.30789	0.910173	0.0535896	0.695908		0.0535896	0.0372934	0.695908
24	36.3047	2.00712	1.41131	0.0552853	0.703152		0.0552853	0.038874	0.703152		23.4674	1.25523	0.873745	0.0534883	0.696084		0.0534883	0.0372323	0.696084
25	37.7339	2.11068	1.47265	0.0559358	0.697714		0.0559358	0.0390272	0.697714		22.9699	1.22766	0.854329	0.0534462	0.695903		0.0534462	0.0371933	0.695903
26	33.9208	1.83885	1.2787	0.0542099	0.695384		0.0542099	0.0376967	0.695384		23.7539	1.27354	0.88641	0.0536139	0.69602		0.0536139	0.0373164	0.69602
27	34.1634	1.84663	1.2843	0.0540527	0.695482		0.0540527	0.0375927	0.695482		22.0229	1.26459	0.888485	0.0574214	0.70259		0.0574214	0.0403437	0.70259
28	33.969	1.82606	1.27018	0.0537567	0.695586		0.0537567	0.0373924	0.695586		22.3114	1.21666	0.847134	0.0545305	0.696281		0.0545305	0.0379686	0.696281
29	33.0415	1.79594	1.24937	0.054354	0.695664		0.054354	0.0378121	0.695664		23.9812	1.29697	0.902299	0.0540825	0.6957		0.0540825	0.0376252	0.6957
30	32.1173	1.73169	1.20452	0.0539178	0.695575		0.0539178	0.0375039	0.695575		22.3827	1.22516	0.852432	0.0547368	0.695773		0.0547368	0.0380844	0.695773
31	30.7418	1.6476	1.14614	0.0535949	0.695641		0.0535949	0.0372828	0.695641		21.8056	1.18292	0.823495	0.0542486	0.696152		0.0542486	0.0377653	0.696152
32	32.9552	1.82277	1.26768	0.0553106	0.695468		0.0553106	0.0384668	0.695468		22.2199	1.18694	0.825969	0.0534182	0.695879		0.0534182	0.0371726	0.695879
33	32.8537	1.76792	1.22957	0.0538119	0.69549		0.0538119	0.0374256	0.69549		22.218	1.18502	0.824959	0.0533363	0.696154		0.0533363	0.0371303	0.696154
34	34.9808	1.8898	1.31475	0.054024	0.69571		0.054024	0.0375851	0.69571		22.9075	1.22433	0.85224	0.0534466	0.696087		0.0534466	0.0372035	0.696087
35	35.5699	1.9546	1.35902	0.0549509	0.695295		0.0549509	0.0382071	0.695295		23.8515	1.28093	0.891391	0.0537043	0.695896		0.0537043	0.0373726	0.695896
36	34.0631	1.86245	1.2951	0.0546763	0.695376		0.0546763	0.0380206	0.695376		22.4196	1.27237	0.88538	0.0567523	0.695853		0.0567523	0.0394913	0.695853
37	34.2537	1.84017	1.28075	0.0537219	0.695995		0.0537219	0.0373902	0.695995		22.355	1.21688	0.846473	0.0544343	0.695611		0.0544343	0.0378651	0.695611
38	41.4711	2.37394	1.65403	0.0572434	0.696744		0.0572434	0.039884	0.696744		23.8611	1.27627	0.887984	0.0534875	0.695764		0.0534875	0.0372147	0.695764
39	34.6339	1.95571	1.37806	0.056468	0.704636		0.056468	0.0397894	0.704636		28.8245	1.63627	1.13895	0.0567666	0.696061		0.0567666	0.039513	0.696061
40	34.7588	1.88168	1.30879	0.0541354	0.695542		0.0541354	0.0376534	0.695542		26.9484	1.53238	1.06524	0.0568634	0.695154		0.0568634	0.0395288	0.695154
41	37.4319	2.02768	1.41043	0.0541699	0.69559		0.0541699	0.03768	0.69559		25.3457	1.43363	0.997072	0.0565631	0.695488		0.0565631	0.039339	0.695488
42	30.5632	1.64239	1.142	0.0537375	0.695332		0.0537375	0.0373654	0.695332		23.673	1.28883	0.897057	0.0544429	0.696027		0.0544429	0.0378937	0.696027
43	28.9383	1.63701	1.13831	0.0565689	0.695359		0.0565689	0.0393357	0.695359		22.5391	1.23519	0.85956	0.0548019	0.695895		0.0548019	0.0381363	0.695895
44	31.1819	1.69167	1.1769	0.0542516	0.695707		0.0542516	0.0377432	0.695707		24.8187	1.32603	0.922898	0.0534288	0.695984		0.0534288	0.0371856	0.695984
45	26.4356	1.43086	0.99542	0.0541265	0.695678		0.0541265	0.0376546	0.695678		26.812	1.46865	1.02182	0.0547757	0.695757		0.0547757	0.0381106	0.695757
46	27.8086	1.57538	1.09665	0.0566506	0.696117		0.0566506	0.0394354	0.696117		27.7999	1.63109	1.13435	0.0586724	0.695456		0.0586724	0.040804	0.695456
47	26.2783	1.42538	0.991658	0.0542418	0.695714		0.0542418	0.0377368	0.695714		22.6148	1.2061	0.839414	0.0533322	0.695974		0.0533322	0.0371178	0.695974
48	23.1537	1.24122	0.86357	0.0536076	0.695745		0.0536076	0.0372972	0.695745		22.2475	1.18825	0.826673	0.0534107	0.695704		0.0534107	0.037158	0.695704
49	25.5133	1.39422	0.97028	0.0546467	0.695931		0.0546467	0.0380303	0.695931		27.4788	1.488	1.03526	0.0541507	0.695743		0.0541507	0.0376749	0.695743
50	23.9813	1.3133	0.913801	0.0547634	0.695807		0.0547634	0.0381047	0.695807		27.9797	1.50946	1.05041	0.0539482	0.695885		0.0539482	0.0375418	0.695885
51	22.2228	1.2113	0.842874	0.0545072	0.695841		0.0545072	0.0379284	0.695841		25.603	1.38351	0.962671	0.0540371	0.695817		0.0540371	0.0375999	0.695817
52	23.6293	1.28685	0.895304	0.05446	0.695731		0.05446	0.0378896	0.695731		21.7851	1.21733	0.846981	0.0558792	0.695767		0.0558792	0.0388789	0.695767
53	27.0731	1.46569	1.0198	0.0541384	0.695778		0.0541384	0.0376683	0.695778		23.4424	1.30874	0.910416	0.0558279	0.695643		0.0558279	0.0388363	0.695643
54	23.6721	1.3007	0.905044	0.0549466	0.695813		0.0549466	0.0382325	0.695813		21.6419	1.1535	0.802953	0.0532996	0.696099		0.0532996	0.0371018	0.696099
55	23.426	1.27695	0.888281	0.0545097	0.695629		0.0545097	0.0379185	0.695629		23.0153	1.23379	0.858545	0.0536071	0.695862		0.0536071	0.0373032	0.695862
56	22.1345	1.18693	0.826112	0.0536233	0.696008		0.0536233	0.0373223	0.696008		23.385	1.27726	0.888881	0.0546189	0.695928		0.0546189	0.0380108	0.695928
57	25.1258	1.46747	1.02061	0.0584048	0.695492		0.0584048	0.0406201	0.695492		22.4153	1.30654	0.908263	0.0582877	0.695169		0.0582877	0.0405198	0.695169
58	22.6864	1.23064	0.856407	0.0542458	0.695904		0.0542458	0.0377499	0.695904		21.3934	1.20507	0.83849	0.0563288	0.695803		0.0563288	0.0391938	0.695803
59	22.6006	1.24145	0.864037	0.0549302	0.695989		0.0549302	0.0382308	0.695989		22.3651	1.19234	0.829798	0.0533127	0.695939		0.0533127	0.0371024	0.695939
60	23.1037	1.265	0.880065	0.0547529	0.695706		0.0547529	0.0380919	0.695706		27.2097	1.49929	1.04275	0.0551014	0.695499		0.0551014	0.038323	0.695499
***	22.4701	1.20287	0.837275	0.0535319	0.696066						L4	C	H4	C | L4	H4 | C
***	L4	C	H4	C | L4	H4 | C						tbdgy	tbdgy	tbdgy	tbdgy - St	tbdgy - St
***	tbdgy	tbdgy	tbdgy	tbdgy - St	tbdgy - St	av	0.0546616	0.0380454	0.696008		21.4721	1.17755	0.819688	0.0567697	0.710202	av	0.0548531	0.0381781	0.696002
***	28.6506	1.56641	1.09039	0.0544891	0.721168	stabw	0.000977719	0.000716513	0.00167883		4.63858	4.63726	4.63041	3.28183	1.03742	stabw	0.00157239	0.0011032	0.000987415
***	5.15783	5.18003	5.17709	0.246761	1.5025	stabw/(n)^0.5	0.00013827	0.00010133	0.000237422		0.996003	0.0546062	0.0379549	0.00186309	0.00736777	stabw/(n)^0.5	0.000222369	0.000156016	0.000139642
***	1.47775	0.0811407	0.0564504	0.000134458	0.0108355	(stabw/(n)^0.5)/av /%	0.00252957	0.0026634	0.00034112		35.9303	35.92	35.867	25.421	8.03582	(stabw/(n)^0.5)/av /%	0.0040539	0.00408653	0.000200634
***	39.9524	40.1244	40.1016	1.91141	11.6383						7.715	0.422978	0.293997	0.0144314	0.0570705
	11.4466	0.628514	0.437263	0.00104151	0.0839318
	WASO04 Laserablation 450 mL/min
	1st run						not blank corr				2nd run						not blank corr				3rd run						not blank corr
Cycle	27.94	28.925	29.916	28.925/27.94 (1)	29.916/28.925 (2)		29/28	30/28	30/29		27.94	28.925	29.916	28.925/27.94 (1)	29.916/28.925 (2)		29/28	30/28	30/29		27.94	28.925	29.916	28.925/27.94 (1)	29.916/28.925 (2)		29/28	30/28	30/29
11	43.169	2.32816	1.61775	0.0539312	0.694861		0.0539312	0.0374747	0.694861		33.2864	1.86859	1.29895	0.0561368	0.69515		0.0561368	0.0390235	0.69515		27.5769	1.4786	1.02859	0.0536172	0.695656		0.0536172	0.0372991	0.695656
12	40.6931	2.19498	1.52541	0.0539398	0.694954		0.0539398	0.0374857	0.694954		29.1392	1.559	1.08363	0.0535018	0.695085		0.0535018	0.0371883	0.695085		25.4784	1.36531	0.949444	0.053587	0.695405		0.053587	0.0372647	0.695405
13	43.9575	2.36409	1.64344	0.0537813	0.695169		0.0537813	0.0373871	0.695169		29.4353	1.6001	1.11236	0.05436	0.695178		0.05436	0.0377899	0.695178		28.7707	1.53749	1.06933	0.0534394	0.695504		0.0534394	0.0371674	0.695504
14	44.4972	2.39203	1.66214	0.0537569	0.694864		0.0537569	0.0373537	0.694864		26.0877	1.40013	0.973781	0.0536701	0.695494		0.0536701	0.0373272	0.695494		30.3	1.74814	1.21504	0.0576945	0.695044		0.0576945	0.0401002	0.695044
15	38.9142	2.13361	1.48263	0.0548286	0.694891		0.0548286	0.0380999	0.694891		27.1251	1.45849	1.01379	0.0537691	0.695094		0.0537691	0.0373746	0.695094		29.5438	1.57893	1.09801	0.0534436	0.695412		0.0534436	0.0371653	0.695412
16	47.4877	2.61013	1.81377	0.0549644	0.694896		0.0549644	0.0381945	0.694896		28.8178	1.53795	1.06939	0.0533682	0.695332		0.0533682	0.0371086	0.695332		27.773	1.48117	1.02983	0.0533313	0.695284		0.0533313	0.0370804	0.695284
17	45.1394	2.41318	1.67706	0.0534606	0.694959		0.0534606	0.0371529	0.694959		29.5338	1.5771	1.09651	0.0533999	0.695266		0.0533999	0.0371271	0.695266		28.7239	1.54273	1.07253	0.0537091	0.695213		0.0537091	0.0373392	0.695213
18	45.8116	2.5017	1.7383	0.0546084	0.694847		0.0546084	0.0379445	0.694847		30.4956	1.62655	1.1309	0.0533373	0.695275		0.0533373	0.0370841	0.695275		26.2348	1.46781	1.0211	0.0559491	0.695657		0.0559491	0.0389214	0.695657
19	46.9704	2.51727	1.74908	0.0535927	0.694833		0.0535927	0.037238	0.694833		30.4233	1.6254	1.13024	0.053426	0.695363		0.053426	0.0371505	0.695363		27.5376	1.59327	1.10747	0.057858	0.695094		0.057858	0.0402168	0.695094
20	47.1296	2.54036	1.76497	0.0539015	0.694772		0.0539015	0.0374493	0.694772		30.4684	1.62696	1.13108	0.0533983	0.695212		0.0533983	0.0371231	0.695212		26.1382	1.3936	0.969136	0.0533165	0.695421		0.0533165	0.0370774	0.695421
21	43.8079	2.35748	1.63832	0.053814	0.694947		0.053814	0.0373979	0.694947		33.7208	1.82255	1.26689	0.0540483	0.695119		0.0540483	0.0375701	0.695119		25.9003	1.47066	1.0222	0.0567814	0.69506		0.0567814	0.0394665	0.69506
22	46.1724	2.46736	1.7146	0.0534381	0.694912		0.0534381	0.0371347	0.694912		34.1171	1.88104	1.30705	0.0551348	0.694858		0.0551348	0.0383108	0.694858		21.7819	1.16305	0.808854	0.0533951	0.695461		0.0533951	0.0371342	0.695461
23	45.2598	2.41852	1.68041	0.0534364	0.694807		0.0534364	0.037128	0.694807		32.6948	1.78198	1.23875	0.0545035	0.695156		0.0545035	0.0378884	0.695156		21.4085	1.14648	0.797506	0.0535526	0.695613		0.0535526	0.0372519	0.695613
24	46.6528	2.50378	1.73964	0.0536685	0.694804		0.0536685	0.0372891	0.694804		32.1565	1.71416	1.19146	0.0533067	0.695072		0.0533067	0.037052	0.695072		22.3644	1.22483	0.852242	0.0547668	0.695806		0.0547668	0.0381071	0.695806
25	43.5326	2.32294	1.61413	0.0533609	0.694866		0.0533609	0.0370787	0.694866		33.9866	1.81052	1.25851	0.0532716	0.695109		0.0532716	0.0370296	0.695109		21.8434	1.26209	0.876862	0.0577789	0.694769		0.0577789	0.040143	0.694769
26	40.4431	2.18936	1.52126	0.0541345	0.694843		0.0541345	0.037615	0.694843		34.2983	1.84315	1.28138	0.0537387	0.695211		0.0537387	0.0373597	0.695211		21.1055	1.12409	0.781862	0.0532606	0.695549		0.0532606	0.0370453	0.695549
27	36.8473	2.02587	1.4075	0.0549802	0.694765		0.0549802	0.0381983	0.694765		34.5398	1.84939	1.28524	0.0535439	0.694954		0.0535439	0.0372105	0.694954		22.8467	1.22176	0.849736	0.0534762	0.695504		0.0534762	0.0371929	0.695504
28	39.1189	2.1144	1.46922	0.0540507	0.694861		0.0540507	0.0375577	0.694861		29.6225	1.66236	1.15868	0.0561183	0.697009		0.0561183	0.0391149	0.697009		21.0771	1.12312	0.781262	0.0532863	0.695617		0.0532863	0.0370669	0.695617
29	36.6512	1.95809	1.36073	0.0534251	0.694928		0.0534251	0.0371266	0.694928		31.2574	1.83057	1.27555	0.0585643	0.696803		0.0585643	0.0408078	0.696803		22.7659	1.21503	0.845367	0.0533705	0.69576		0.0533705	0.0371331	0.69576
30	43.4022	2.33714	1.62395	0.0538484	0.694844		0.0538484	0.0374162	0.694844		28.1063	1.5412	1.07139	0.0548347	0.695163		0.0548347	0.0381191	0.695163		23.3775	1.38937	0.965589	0.0594317	0.694986		0.0594317	0.0413042	0.694986
31	44.4084	2.39598	1.66415	0.0539533	0.69456		0.0539533	0.0374738	0.69456		27.5553	1.46867	1.02079	0.0532989	0.695042		0.0532989	0.037045	0.695042		20.2581	1.08059	0.751358	0.0533412	0.695321		0.0533412	0.0370892	0.695321
32	38.1346	2.03242	1.4118	0.053296	0.694641		0.053296	0.0370216	0.694641		28.4742	1.5167	1.05468	0.0532659	0.695379		0.0532659	0.03704	0.695379		19.3049	1.0693	0.743582	0.0553901	0.695389		0.0553901	0.0385177	0.695389
33	36.3455	1.93897	1.34792	0.0533483	0.695173		0.0533483	0.0370863	0.695173		29.5382	1.57385	1.0941	0.0532819	0.695177		0.0532819	0.0370403	0.695177		19.1363	1.05266	0.732117	0.0550087	0.695492		0.0550087	0.0382581	0.695492
34	41.2343	2.21901	1.54202	0.0538147	0.694911		0.0538147	0.0373965	0.694911		27.0388	1.54247	1.07191	0.0570464	0.694931		0.0570464	0.0396433	0.694931		20.5828	1.0959	0.762308	0.0532434	0.695601		0.0532434	0.0370361	0.695601
35	42.2285	2.25373	1.56609	0.0533699	0.694889		0.0533699	0.0370861	0.694889		26.5004	1.43636	0.998559	0.0542014	0.695201		0.0542014	0.0376809	0.695201		23.375	1.24485	0.865806	0.0532559	0.695508		0.0532559	0.0370399	0.695508
36	39.1332	2.12512	1.47629	0.0543048	0.694686		0.0543048	0.0377248	0.694686		27.0226	1.44009	1.00127	0.053292	0.695286		0.053292	0.0370532	0.695286		22.3947	1.1925	0.829242	0.0532493	0.695379		0.0532493	0.0370284	0.695379
37	41.4172	2.21406	1.53848	0.0534575	0.694871		0.0534575	0.0371461	0.694871		27.9777	1.50007	1.04285	0.0536167	0.695199		0.0536167	0.0372743	0.695199		23.1418	1.23327	0.857957	0.0532919	0.695676		0.0532919	0.0370739	0.695676
38	41.7361	2.3847	1.65622	0.0571377	0.694519		0.0571377	0.0396832	0.694519		25.0972	1.34222	0.933304	0.0534807	0.695344		0.0534807	0.0371875	0.695344		22.618	1.20461	0.837586	0.0532588	0.695318		0.0532588	0.0370318	0.695318
39	32.4243	1.73035	1.20241	0.0533659	0.694895		0.0533659	0.0370837	0.694895		25.9597	1.38607	0.963901	0.053393	0.695422		0.053393	0.0371307	0.695422		20.9425	1.13509	0.789241	0.0542002	0.695311		0.0542002	0.037686	0.695311
40	32.3769	1.73466	1.20551	0.0535773	0.694955		0.0535773	0.0372338	0.694955		32.5713	2.09068	1.45344	0.0641879	0.6952		0.0641879	0.0446234	0.6952		23.4615	1.3907	0.966486	0.0592758	0.694964		0.0592758	0.0411946	0.694964
41	30.9967	1.65049	1.14704	0.0532472	0.694971		0.0532472	0.0370053	0.694971		31.5385	1.82076	1.26344	0.0577313	0.693907		0.0577313	0.0400602	0.693907		22.045	1.2243	0.851044	0.0555365	0.695127		0.0555365	0.0386049	0.695127
42	36.7408	1.95829	1.36092	0.0533002	0.694952		0.0533002	0.037041	0.694952		29.1102	1.57077	1.09201	0.0539595	0.695205		0.0539595	0.0375129	0.695205		19.0804	1.02346	0.711574	0.0536392	0.695264		0.0536392	0.0372934	0.695264
43	33.5123	1.79351	1.24653	0.0535179	0.695023		0.0535179	0.0371962	0.695023		28.2583	1.56963	1.09077	0.0555457	0.694923		0.0555457	0.0386	0.694923		18.6115	1.02817	0.714866	0.0552438	0.69528		0.0552438	0.0384099	0.69528
44	30.9858	1.69213	1.17547	0.0546099	0.694668		0.0546099	0.0379357	0.694668		27.3525	1.54103	1.07138	0.0563395	0.695234		0.0563395	0.0391692	0.695234		19.1282	1.02084	0.710032	0.0533685	0.695533		0.0533685	0.0371196	0.695533
45	34.7911	1.87579	1.30362	0.0539157	0.694973		0.0539157	0.03747	0.694973		29.6481	1.63209	1.13434	0.055049	0.695021		0.055049	0.0382602	0.695021		21.1125	1.13788	0.79142	0.0538962	0.695519		0.0538962	0.0374859	0.695519
46	31.5008	1.69391	1.17723	0.0537735	0.694976		0.0537735	0.0373713	0.694976		29.3223	1.56222	1.08565	0.0532776	0.694937		0.0532776	0.0370246	0.694937		21.7266	1.16992	0.813495	0.0538472	0.695344		0.0538472	0.0374423	0.695344
47	35.7731	1.90923	1.32707	0.0533705	0.695082		0.0533705	0.0370969	0.695082		27.3964	1.48648	1.0334	0.0542581	0.695203		0.0542581	0.0377204	0.695203		20.7802	1.18386	0.831809	0.0569706	0.702623		0.0569706	0.0400288	0.702623
48	35.8114	1.90873	1.32622	0.0532995	0.694818		0.0532995	0.0370335	0.694818		29.7891	1.66268	1.16312	0.0558151	0.699546		0.0558151	0.0390452	0.699546		19.056	1.0144	0.705658	0.0532329	0.695639		0.0532329	0.0370308	0.695639
49	37.0578	1.9871	1.38157	0.0536218	0.695268		0.0536218	0.0372815	0.695268		27.731	1.47878	1.02795	0.0533258	0.695137		0.0533258	0.0370687	0.695137		19.3807	1.03173	0.717629	0.053235	0.695558		0.053235	0.037028	0.695558
50	35.1374	1.92932	1.34078	0.0549079	0.694951		0.0549079	0.0381583	0.694951		30.5803	1.89735	1.32066	0.0620449	0.696051		0.0620449	0.0431864	0.696051		20.8566	1.14028	0.792939	0.0546723	0.695391		0.0546723	0.0380186	0.695391
51	34.455	1.85311	1.28759	0.0537836	0.694826		0.0537836	0.0373702	0.694826		27.7967	1.48131	1.02955	0.053291	0.695023		0.053291	0.0370385	0.695023		20.8213	1.11001	0.772131	0.0533112	0.695607		0.0533112	0.0370837	0.695607
52	31.1367	1.6609	1.15428	0.0533424	0.694972		0.0533424	0.0370715	0.694972		28.9795	1.62412	1.12849	0.0560438	0.694834		0.0560438	0.0389412	0.694834		19.4766	1.08175	0.752196	0.0555411	0.695349		0.0555411	0.0386204	0.695349
53	33.0477	1.75979	1.22315	0.0532499	0.695056		0.0532499	0.0370117	0.695056		24.9306	1.3273	0.922776	0.0532398	0.695228		0.0532398	0.0370138	0.695228		18.4607	0.983059	0.683739	0.0532514	0.695522		0.0532514	0.0370375	0.695522
54	34.3327	1.8317	1.27271	0.0533516	0.694825		0.0533516	0.03707	0.694825		25.0274	1.33901	0.931081	0.0535018	0.695351		0.0535018	0.0372025	0.695351		18.5845	0.992449	0.69038	0.0534019	0.695632		0.0534019	0.0371481	0.695632
55	34.7759	1.8532	1.28799	0.0532899	0.69501		0.0532899	0.037037	0.69501		26.7509	1.44815	1.00664	0.0541344	0.695124		0.0541344	0.0376301	0.695124		19.9145	1.06338	0.739637	0.0533974	0.695551		0.0533974	0.0371406	0.695551
56	36.4532	1.97601	1.37291	0.0542068	0.694787		0.0542068	0.0376622	0.694787		26.8612	1.43115	0.994771	0.0532796	0.695083		0.0532796	0.0370338	0.695083		21.2502	1.14546	0.796487	0.0539032	0.695345		0.0539032	0.0374814	0.695345
57	34.4767	1.85242	1.28704	0.0537294	0.694788		0.0537294	0.0373306	0.694788		26.2456	1.40316	0.975125	0.0534626	0.694951		0.0534626	0.0371539	0.694951		19.7281	1.16085	0.807164	0.0588424	0.695322		0.0588424	0.0409144	0.695322
58	34.5053	1.8384	1.2777	0.0532788	0.695004		0.0532788	0.037029	0.695004		26.8161	1.43529	0.99801	0.0535235	0.695337		0.0535235	0.0372168	0.695337		20.4527	1.09186	0.759263	0.0533848	0.695384		0.0533848	0.0371229	0.695384
59	30.8874	1.65852	1.15252	0.0536958	0.694908		0.0536958	0.0373136	0.694908		27.3371	1.46028	1.01511	0.0534176	0.695144		0.0534176	0.037133	0.695144		21.7136	1.16377	0.80946	0.0535963	0.695551		0.0535963	0.0372789	0.695551
60	27.9062	1.48587	1.03314	0.0532451	0.69531		0.0532451	0.0370219	0.69531		28.5279	1.52128	1.05747	0.0533261	0.695118		0.0533261	0.0370679	0.695118		22.033	1.18803	0.826284	0.0539205	0.695506		0.0539205	0.0375021	0.695506
***	L4	C	H4	C | L4	H4 | C						L4	C	H4	C | L4	H4 | C						L4	C	H4	C | L4	H4 | C
***	tbdgy	tbdgy	tbdgy	tbdgy - St	tbdgy - St						tbdgy	tbdgy	tbdgy	tbdgy - St	tbdgy - St						tbdgy	tbdgy	tbdgy	tbdgy - St	tbdgy - St
***	35.6067	1.93005	1.34132	0.0540096	0.723269	av	0.0538257	0.0374033	0.694898		26.5594	1.44926	1.00782	0.0543903	0.720261	av	0.0545813	0.0379512	0.695309		20.5559	1.11942	0.77873	0.0543392	0.716267	av	0.0544951	0.0379045	0.695556
***	4.53609	4.63564	4.63136	0.336385	1.69276	stabw	0.000678779	0.000467681	0.000151727		4.32612	4.39507	4.3904	0.487457	1.49684	stabw	0.0021862	0.0015289	0.000750569		4.57663	4.62306	4.61546	0.395587	1.30277	stabw	0.00176979	0.0012355	0.00104215
***	1.61515	0.08947	0.0621214	0.00018168	0.0122432	stabw/(n)^0.5	9.59938e-05	6.61401e-05	2.14574e-05		1.14899	0.0636962	0.0442473	0.00026513	0.0107811	stabw/(n)^0.5	0.000309176	0.000216219	0.000106146		0.940767	0.0517516	0.035942	0.000214959	0.00933133	stabw/(n)^0.5	0.000250286	0.000174727	0.000147382
***	35.1364	35.9075	35.8743	2.60562	13.1121	(stabw/(n)^0.5)/av /%	0.00178342	0.00176829	3.08785e-05		33.51	34.0441	34.0079	3.77583	11.5944	(stabw/(n)^0.5)/av /%	0.00566451	0.00569731	0.000152661		35.4504	35.81	35.7512	3.06421	10.0912	(stabw/(n)^0.5)/av /%	0.00459281	0.00460966	0.000211891
***	12.5109	0.693031	0.48119	0.00140729	0.0948356						8.90005	0.493389	0.342738	0.00205369	0.0835102						7.28715	0.400866	0.278405	0.00166506	0.0722802
	WASO04 Laserablation 500 mL/min
	1st run						not blank corr				2nd run						not blank corr				3rd run						not blank corr
Cycle	27.94	28.925	29.916	28.925/27.94 (1)	29.916/28.925 (2)		29/28	30/28	30/29		27.94	28.925	29.916	28.925/27.94 (1)	29.916/28.925 (2)		29/28	30/28	30/29		27.94	28.925	29.916	28.925/27.94 (1)	29.916/28.925 (2)		29/28	30/28	30/29
11	48.8908	2.79709	1.94508	0.057211	0.695394		0.057211	0.0397842	0.695394		40.0143	2.13969	1.48873	0.0534731	0.695768		0.0534731	0.0372049	0.695768		37.7049	2.00872	1.39735	0.0532749	0.69564		0.0532749	0.0370601	0.69564
12	48.9795	2.86068	1.98868	0.0584056	0.695176		0.0584056	0.0406022	0.695176		40.7117	2.18228	1.51794	0.0536032	0.695576		0.0536032	0.0372851	0.695576		41.7307	2.32985	1.62101	0.0558306	0.695756		0.0558306	0.0388445	0.695756
13	46.9819	2.61603	1.81888	0.0556817	0.695283		0.0556817	0.0387146	0.695283		41.8209	2.24553	1.56166	0.0536938	0.695452		0.0536938	0.0373415	0.695452		41.6227	2.25154	1.56551	0.0540941	0.695304		0.0540941	0.0376119	0.695304
14	40.0634	2.15457	1.49854	0.0537789	0.695519		0.0537789	0.0374043	0.695519		39.6342	2.11663	1.47209	0.0534042	0.695487		0.0534042	0.0371419	0.695487		43.2657	2.32517	1.61668	0.0537418	0.695295		0.0537418	0.0373664	0.695295
15	42.6797	2.29936	1.59951	0.053875	0.695629		0.053875	0.037477	0.695629		40.3269	2.14731	1.49365	0.0532477	0.695591		0.0532477	0.0370386	0.695591		39.2387	2.11068	1.46821	0.0537907	0.695608		0.0537907	0.0374173	0.695608
16	40.3047	2.15662	1.50008	0.0535078	0.695571		0.0535078	0.0372185	0.695571		34.6466	1.86395	1.29663	0.0537989	0.695633		0.0537989	0.0374243	0.695633		40.3375	2.25441	1.56728	0.0558887	0.695206		0.0558887	0.0388542	0.695206
17	44.4246	2.36745	1.64653	0.0532914	0.695489		0.0532914	0.0370636	0.695489		38.4004	2.05276	1.42796	0.0534568	0.69563		0.0534568	0.0371862	0.69563		40.2568	2.22063	1.54428	0.0551617	0.695424		0.0551617	0.0383608	0.695424
18	45.3642	2.47973	1.7241	0.0546627	0.695278		0.0546627	0.0380058	0.695278		38.3641	2.04478	1.42254	0.0532994	0.695694		0.0532994	0.03708	0.695694		42.8498	2.41086	1.67901	0.056263	0.696436		0.056263	0.0391836	0.696436
19	43.7902	2.35874	1.6403	0.0538645	0.695413		0.0538645	0.0374581	0.695413		43.0785	2.3012	1.60047	0.0534188	0.695492		0.0534188	0.0371523	0.695492		41.5915	2.21899	1.54306	0.053352	0.695389		0.053352	0.0371004	0.695389
20	45.0344	2.4301	1.68964	0.0539611	0.695293		0.0539611	0.0375188	0.695293		43.9417	2.44216	1.69774	0.0555773	0.695179		0.0555773	0.0386362	0.695179		43.5589	2.37663	1.65272	0.0545613	0.695407		0.0545613	0.0379423	0.695407
21	44.8229	2.42482	1.68581	0.0540977	0.695232		0.0540977	0.0376105	0.695232		43.1272	2.31271	1.60788	0.0536253	0.695235		0.0536253	0.0372822	0.695235		41.5696	2.30475	1.60988	0.0554431	0.698507		0.0554431	0.0387274	0.698507
22	43.4936	2.39188	1.66315	0.0549937	0.695331		0.0549937	0.0382389	0.695331		38.3399	2.04883	1.42502	0.0534386	0.69553		0.0534386	0.0371681	0.69553		37.5595	2.01372	1.40052	0.053614	0.69549		0.053614	0.037288	0.69549
23	40.3693	2.15913	1.50135	0.0534846	0.695348		0.0534846	0.0371904	0.695348		32.3903	1.79473	1.24974	0.0554095	0.696335		0.0554095	0.0385836	0.696335		36.2528	1.93483	1.34528	0.0533704	0.695299		0.0533704	0.0371084	0.695299
24	42.3548	2.26116	1.57219	0.0533861	0.695304		0.0533861	0.0371196	0.695304		34.9378	1.87735	1.30603	0.0537341	0.695678		0.0537341	0.0373816	0.695678		38.7769	2.13926	1.48732	0.0551685	0.69525		0.0551685	0.0383559	0.69525
25	37.8922	2.02718	1.40976	0.0534986	0.695428		0.0534986	0.0372044	0.695428		38.3362	2.04152	1.42027	0.0532531	0.695691		0.0532531	0.0370477	0.695691		36.5995	1.96913	1.36951	0.0538021	0.695491		0.0538021	0.0374189	0.695491
26	37.686	2.01232	1.39933	0.0533969	0.695383		0.0533969	0.0371313	0.695383		44.28	2.39179	1.66364	0.0540152	0.695562		0.0540152	0.0375709	0.695562		37.5448	2.00928	1.39763	0.0535167	0.695591		0.0535167	0.0372257	0.695591
27	40.0023	2.15949	1.50156	0.0539841	0.695331		0.0539841	0.0375368	0.695331		44.0291	2.36431	1.64398	0.0536989	0.695331		0.0536989	0.0373385	0.695331		32.3492	1.72393	1.19891	0.0532912	0.695455		0.0532912	0.0370616	0.695455
28	44.0174	2.39924	1.66844	0.0545065	0.695405		0.0545065	0.0379041	0.695405		40.0681	2.24858	1.56294	0.0561189	0.695079		0.0561189	0.0390071	0.695079		33.3516	1.82442	1.26908	0.0547027	0.695604		0.0547027	0.0380514	0.695604
29	43.51	4.82062	3.38429	0.110793	0.702045		0.110793	0.077782	0.702045		31.9681	1.7098	1.18928	0.0534847	0.695565		0.0534847	0.0372021	0.695565		37.119	2.00014	1.39108	0.0538845	0.695494		0.0538845	0.0374763	0.695494
30	37.146	1.99386	1.386	0.0536762	0.695134		0.0536762	0.0373122	0.695134		35.2916	2.00525	1.3949	0.0568196	0.695621		0.0568196	0.0395249	0.695621		34.5167	1.92891	1.34161	0.0558834	0.695526		0.0558834	0.0388683	0.695526
31	32.574	1.75378	1.22028	0.0538399	0.695798		0.0538399	0.0374618	0.695798		42.7396	2.54125	1.76851	0.0594589	0.695922		0.0594589	0.0413788	0.695922		37.0577	1.9905	1.38428	0.0537136	0.695442		0.0537136	0.0373547	0.695442
32	32.6066	1.74866	1.21666	0.053629	0.695767		0.053629	0.0373133	0.695767		38.6199	2.07286	1.44145	0.0536735	0.695391		0.0536735	0.0373241	0.695391		40.2833	2.14673	1.49307	0.0532907	0.695512		0.0532907	0.0370643	0.695512
33	35.214	1.87911	1.30687	0.0533625	0.695472		0.0533625	0.0371121	0.695472		35.6284	1.9026	1.32324	0.0534012	0.695493		0.0534012	0.0371401	0.695493		36.3532	1.95695	1.3609	0.0538317	0.695417		0.0538317	0.0374355	0.695417
34	35.3224	1.88343	1.31047	0.053321	0.695789		0.053321	0.0371001	0.695789		38.4555	2.04725	1.42373	0.0532369	0.695435		0.0532369	0.0370227	0.695435		38.0112	2.02481	1.40816	0.0532688	0.695454		0.0532688	0.037046	0.695454
35	37.7201	2.08902	1.45805	0.0553821	0.697959		0.0553821	0.0386544	0.697959		41.2438	2.19599	1.52674	0.0532442	0.695239		0.0532442	0.0370175	0.695239		35.5749	1.89328	1.31725	0.0532196	0.695752		0.0532196	0.0370276	0.695752
36	38.493	2.05509	1.42938	0.0533887	0.695531		0.0533887	0.0371335	0.695531		40.6237	2.19128	1.52331	0.0539408	0.695171		0.0539408	0.0374981	0.695171		40.0821	2.13891	1.48679	0.0533632	0.695113		0.0533632	0.0370935	0.695113
37	38.3768	2.07092	1.44036	0.0539629	0.695514		0.0539629	0.037532	0.695514		41.5525	2.21127	1.53812	0.0532163	0.69558		0.0532163	0.0370162	0.69558		37.3187	2.05836	1.43152	0.0551561	0.695467		0.0551561	0.0383592	0.695467
38	39.7109	2.20081	1.52982	0.0554209	0.695116		0.0554209	0.0385239	0.695116		39.0072	2.07672	1.444	0.0532393	0.69533		0.0532393	0.0370189	0.69533		40.6671	2.189	1.5218	0.0538273	0.695204		0.0538273	0.0374209	0.695204
39	41.7765	2.23623	1.55449	0.0535284	0.695136		0.0535284	0.0372096	0.695136		35.91	1.9328	1.34451	0.0538234	0.695626		0.0538234	0.037441	0.695626		43.7916	2.38348	1.65666	0.0544277	0.695059		0.0544277	0.0378304	0.695059
40	43.093	2.33514	1.62353	0.0541884	0.695261		0.0541884	0.0376751	0.695261		35.5422	1.89218	1.31611	0.0532376	0.695551		0.0532376	0.0370294	0.695551		39.0071	2.07921	1.4456	0.0533035	0.695264		0.0533035	0.03706	0.695264
41	48.2803	2.69898	1.87582	0.0559024	0.69501		0.0559024	0.0388527	0.69501		42.9258	2.29277	1.59426	0.0534122	0.695343		0.0534122	0.0371398	0.695343		40.5282	2.16039	1.50249	0.0533058	0.695474		0.0533058	0.0370728	0.695474
42	45.4525	2.44062	1.69599	0.053696	0.6949		0.053696	0.0373134	0.6949		43.0519	2.29597	1.59626	0.0533302	0.695248		0.0533302	0.0370777	0.695248		39.3203	2.11589	1.47106	0.0538118	0.695241		0.0538118	0.0374121	0.695241
43	35.6137	2.01175	1.39857	0.0564882	0.695198		0.0564882	0.0392705	0.695198		43.5929	2.36425	1.64378	0.0542347	0.695266		0.0542347	0.0377075	0.695266		32.7921	1.8411	1.29021	0.0561445	0.700781		0.0561445	0.039345	0.700781
44	40.8347	2.18159	1.51692	0.0534249	0.695329		0.0534249	0.0371479	0.695329		37.9398	2.16281	1.51403	0.0570063	0.70003		0.0570063	0.0399061	0.70003		36.5199	2.19081	1.52323	0.0599895	0.695282		0.0599895	0.0417096	0.695282
45	40.5186	2.16346	1.50395	0.0533943	0.695159		0.0533943	0.0371175	0.695159		35.3686	1.88325	1.30981	0.0532462	0.695508		0.0532462	0.0370332	0.695508		31.7858	1.72396	1.19864	0.0542368	0.695284		0.0542368	0.03771	0.695284
46	39.6764	2.23565	1.55434	0.0563472	0.695251		0.0563472	0.0391754	0.695251		39.2058	2.08795	1.45186	0.053256	0.695352		0.053256	0.0370317	0.695352		37.9385	2.13044	1.4839	0.056155	0.696525		0.056155	0.0391134	0.696525
47	38.0178	2.03592	1.41553	0.0535518	0.695277		0.0535518	0.0372333	0.695277		37.8005	2.01613	1.40181	0.053336	0.6953		0.053336	0.0370846	0.6953		39.5827	2.10777	1.46597	0.0532498	0.695508		0.0532498	0.0370357	0.695508
48	36.9069	1.96697	1.3678	0.0532956	0.695385		0.0532956	0.0370609	0.695385		39.5174	2.40336	1.67369	0.0608178	0.696393		0.0608178	0.0423531	0.696393		38.0968	2.1221	1.47799	0.0557028	0.696476		0.0557028	0.0387957	0.696476
49	34.9306	1.91343	1.33065	0.054778	0.695427		0.054778	0.0380941	0.695427		47.4922	2.73546	1.89995	0.0575981	0.694565		0.0575981	0.0400056	0.694565		33.5089	1.80379	1.25467	0.0538303	0.695573		0.0538303	0.0374429	0.695573
50	33.5589	1.78708	1.24319	0.0532519	0.695655		0.0532519	0.037045	0.695655		41.0584	2.2052	1.53348	0.0537088	0.695393		0.0537088	0.0373487	0.695393		32.3553	1.76549	1.22794	0.0545658	0.695521		0.0545658	0.0379517	0.695521
51	33.0048	1.76506	1.22769	0.0534789	0.695552		0.0534789	0.0371973	0.695552		39.2787	2.09783	1.45867	0.053409	0.695321		0.053409	0.0371364	0.695321		31.5271	1.72517	1.20005	0.0547201	0.695616		0.0547201	0.0380642	0.695616
52	35.5491	1.95339	1.35819	0.0549492	0.6953		0.0549492	0.0382062	0.6953		42.8235	2.28718	1.59037	0.0534094	0.695342		0.0534094	0.0371378	0.695342		31.9795	1.70787	1.1879	0.0534051	0.695545		0.0534051	0.0371457	0.695545
53	42.6209	2.32783	1.61829	0.0546169	0.695192		0.0546169	0.0379693	0.695192		45.5172	2.45925	1.70987	0.0540289	0.695281		0.0540289	0.0375652	0.695281		33.6057	1.79051	1.24567	0.05328	0.695708		0.05328	0.0370674	0.695708
54	37.433	1.99899	1.39023	0.053402	0.695465		0.053402	0.0371392	0.695465		40.0175	2.13479	1.48412	0.0533464	0.695205		0.0533464	0.0370867	0.695205		33.2322	1.77696	1.23607	0.053471	0.695608		0.053471	0.0371948	0.695608
55	35.8356	2.01647	1.40236	0.05627	0.695451		0.05627	0.039133	0.695451		39.6479	2.11586	1.47095	0.0533664	0.695202		0.0533664	0.0371004	0.695202		37.0684	1.97658	1.37433	0.0533225	0.695308		0.0533225	0.0370756	0.695308
56	33.5642	1.84363	1.28116	0.0549285	0.694912		0.0549285	0.0381705	0.694912		39.5183	2.10741	1.46519	0.0533274	0.695257		0.0533274	0.0370762	0.695257		36.5604	2.04383	1.42156	0.0559028	0.695537		0.0559028	0.0388825	0.695537
57	29.9564	1.62175	1.1284	0.0541368	0.695796		0.0541368	0.0376682	0.695796		43.9706	2.35029	1.63365	0.0534514	0.695084		0.0534514	0.0371532	0.695084		33.5826	1.79646	1.24988	0.0534938	0.695745		0.0534938	0.0372181	0.695745
58	38.7389	2.16422	1.5134	0.0558668	0.69928		0.0558668	0.0390666	0.69928		42.3327	2.27964	1.58473	0.0538504	0.695168		0.0538504	0.0374351	0.695168		33.5222	1.7846	1.2412	0.0532365	0.695507		0.0532365	0.0370264	0.695507
59	35.1435	1.87253	1.30228	0.0532824	0.695466		0.0532824	0.0370561	0.695466		38.5304	2.17418	1.51097	0.0564278	0.694958		0.0564278	0.0392149	0.694958		30.6335	1.63067	1.13441	0.0532315	0.695672		0.0532315	0.0370317	0.695672
60	37.7747	2.02334	1.40685	0.0535634	0.695308		0.0535634	0.0372431	0.695308		39.761	2.15556	1.49883	0.0542129	0.695334		0.0542129	0.0376961	0.695334		31.0614	1.65272	1.15011	0.053208	0.695893		0.053208	0.0370271	0.695893
***	L4	C	H4	C | L4	H4 | C						L4	C	H4	C | L4	H4 | C						L4	C	H4	C | L4	H4 | C
***	tbdgy	tbdgy	tbdgy	tbdgy - St	tbdgy - St						tbdgy	tbdgy	tbdgy	tbdgy - St	tbdgy - St						tbdgy	tbdgy	tbdgy	tbdgy - St	tbdgy - St
***	36.8594	2.05338	1.42889	0.0553483	0.745744	av	0.0554541	0.0385831	0.695633		36.4373	1.97403	1.37326	0.0540706	0.747887	av	0.0541964	0.0376955	0.695528		34.0475	1.84636	1.28475	0.0541534	0.739636	av	0.054286	0.0377668	0.695693
***	4.20603	4.79197	4.80064	1.7341	3.26654	stabw	0.00807099	0.00571561	0.00115271		4.10656	4.14276	4.13434	0.367649	3.38864	stabw	0.00163803	0.00115321	0.000715214		4.13159	4.1573	4.14921	0.289999	2.96805	stabw	0.00128578	0.000910444	0.000897249
***	1.55032	0.0983972	0.0685957	0.000959797	0.02436	stabw/(n)^0.5	0.00114141	0.00080831	0.000163018		1.49632	0.0817792	0.0567753	0.00019879	0.0253432	stabw/(n)^0.5	0.000231652	0.000163089	0.000101147		1.40671	0.0767588	0.0533069	0.000157045	0.0219527	stabw/(n)^0.5	0.000181837	0.000128756	0.00012689
***	32.5797	37.1185	37.1856	13.4323	25.3025	(stabw/(n)^0.5)/av /%	0.020583	0.0209499	0.000234344		31.8093	32.0897	32.0245	2.8478	26.2483	(stabw/(n)^0.5)/av /%	0.0042743	0.00432647	0.000145424		32.0032	32.2023	32.1396	2.24633	22.9904	(stabw/(n)^0.5)/av /%	0.0033496	0.00340925	0.000182394
***	12.0087	0.762182	0.53134	0.00743456	0.188692						11.5904	0.633459	0.43978	0.00153982	0.196308						10.8963	0.594571	0.412914	0.00121646	0.170045

## Sheet: laser tube all data
	Laserablation - lasertube characterization
	solid samples		WASO04
	dissolved sample		WASO04 4 µg/g
	Neptune XT
	ESI NWR213
	WASO04 Laserablation (short sample tube)
	1st run						not blank corr				2nd run						not blank corr				3rd run						not blank corr
Cycle	27.94	28.925	29.916	28.925/27.94 (1)	29.916/28.925 (2)		29/28	30/28	30/29		27.94	28.925	29.916	28.925/27.94 (1)	29.916/28.925 (2)		29/28	30/28	30/29		27.94	28.925	29.916	28.925/27.94 (1)	29.916/28.925 (2)		29/28	30/28	30/29
1	0.0772105	0.00413984	0.00404972	0.0536176	0.97823		0.0536176	0.0524503	0.97823		0.0780807	0.00411947	0.00401138	0.0527591	0.97376		0.0527591	0.0513747	0.97376		0.0793865	0.00420244	0.00403193	0.0529365	0.959426		0.0529365	0.0507886	0.959426
2	0.0765675	0.00403533	0.00399562	0.052703	0.990159		0.052703	0.0521843	0.990159		1.6272	0.0861645	0.0614418	0.0529527	0.713076		0.0529527	0.0377593	0.713076		3.16549	0.16738	0.118257	0.0528763	0.706521		0.0528763	0.0373582	0.706521
3	19.8492	1.05584	0.736928	0.0531933	0.697953		0.0531933	0.0371264	0.697953		18.891	1.03811	0.724179	0.0549527	0.697593		0.0549527	0.0383347	0.697593		27.2699	1.47109	1.02467	0.0539457	0.696536		0.0539457	0.0375751	0.696536
4	41.0705	2.22097	1.54446	0.054077	0.695399		0.054077	0.0376051	0.695399		51.2849	3.45721	2.40404	0.0674118	0.695372		0.0674118	0.0468763	0.695372		50.6948	3.58477	2.4926	0.0707128	0.695329		0.0707128	0.0491687	0.695329
5	30.352	1.62531	1.13029	0.0535487	0.695428		0.0535487	0.0372393	0.695428		51.2328	3.49588	2.43021	0.0682352	0.695163		0.0682352	0.0474346	0.695163		51.3159	4.0856	2.8393	0.0796165	0.694954		0.0796165	0.0553298	0.694954
6	24.3439	1.32722	0.923287	0.0545196	0.695654		0.0545196	0.0379268	0.695654		48.7885	2.90582	2.01937	0.0595596	0.69494		0.0595596	0.0413904	0.69494		41.3273	2.32728	1.61708	0.0563133	0.694836		0.0563133	0.0391286	0.694836
7	21.7101	1.20001	0.834823	0.0552741	0.695683		0.0552741	0.0384533	0.695683		39.0617	2.13172	1.4822	0.0545731	0.695308		0.0545731	0.0379451	0.695308		41.0737	2.30639	1.60347	0.0561525	0.695227		0.0561525	0.0390388	0.695227
8	24.6986	1.34903	0.938481	0.0546196	0.695673		0.0546196	0.0379974	0.695673		41.7899	2.28471	1.58829	0.0546713	0.695182		0.0546713	0.0380066	0.695182		45.4987	2.58881	1.79915	0.0568986	0.694972		0.0568986	0.0395429	0.694972
9	21.9686	1.20539	0.838474	0.0548687	0.695605		0.0548687	0.038167	0.695605		40.0804	2.21124	1.53648	0.0551701	0.694852		0.0551701	0.038335	0.694852		45.6291	2.53245	1.76023	0.0555008	0.695069		0.0555008	0.0385768	0.695069
10	20.187	1.14001	0.793133	0.0564725	0.695725		0.0564725	0.0392893	0.695725		35.1652	1.96724	1.36726	0.0559429	0.695011		0.0559429	0.038881	0.695011		38.4235	2.13887	1.48625	0.0556658	0.694875		0.0556658	0.0386808	0.694875
11	21.1351	1.15381	0.80281	0.0545918	0.695793		0.0545918	0.0379846	0.695793		30.0093	1.66646	1.15871	0.0555314	0.695312		0.0555314	0.0386117	0.695312		29.9924	1.68865	1.17366	0.0563027	0.69503		0.0563027	0.0391321	0.69503
12	20.8008	1.1716	0.814818	0.0563247	0.695476		0.0563247	0.0391725	0.695476		31.9102	1.75351	1.21919	0.0549512	0.695287		0.0549512	0.0382069	0.695287		27.7792	1.55405	1.08012	0.055943	0.695035		0.055943	0.0388823	0.695035
13	17.6589	0.984614	0.685119	0.0557574	0.695825		0.0557574	0.0387974	0.695825		27.5794	1.5083	1.04888	0.0546893	0.695405		0.0546893	0.0380312	0.695405		29.3594	1.68901	1.17378	0.0575287	0.694954		0.0575287	0.0399798	0.694954
14	21.8698	1.18684	0.825369	0.0542685	0.695434		0.0542685	0.0377402	0.695434		25.7776	1.40472	0.976666	0.0544938	0.695273		0.0544938	0.0378881	0.695273		25.716	1.44242	1.00285	0.0560904	0.695258		0.0560904	0.0389973	0.695258
15	20.3439	1.12242	0.780887	0.0551721	0.69572		0.0551721	0.0383843	0.69572		23.6253	1.31383	0.9139	0.0556114	0.695598		0.0556114	0.0386831	0.695598		27.2893	1.55543	1.08101	0.0569977	0.694992		0.0569977	0.0396129	0.694992
16	16.8463	0.914396	0.636227	0.0542788	0.695789		0.0542788	0.0377666	0.695789		25.6656	1.4342	0.997404	0.05588	0.695444		0.05588	0.0388614	0.695444		28.5863	1.59274	1.10804	0.0557171	0.695682		0.0557171	0.0387614	0.695682
17	16.9923	0.939304	0.653534	0.0552782	0.695764		0.0552782	0.0384606	0.695764		25.3997	1.38535	0.963533	0.0545421	0.695514		0.0545421	0.0379348	0.695514		29.6715	1.68363	1.16974	0.0567425	0.694772		0.0567425	0.0394231	0.694772
18	16.5459	0.892797	0.621137	0.0539589	0.69572		0.0539589	0.0375403	0.69572		29.2574	1.62579	1.1299	0.0555684	0.694985		0.0555684	0.0386192	0.694985		22.391	1.27377	0.885118	0.0568877	0.694878		0.0568877	0.03953	0.694878
19	16.4716	0.908806	0.632202	0.055174	0.69564		0.055174	0.0383812	0.69564		22.5931	1.2611	0.876931	0.0558177	0.695372		0.0558177	0.0388141	0.695372		22.7227	1.3139	0.913259	0.0578234	0.695074		0.0578234	0.0401915	0.695074
20	15.8132	0.880308	0.612533	0.0556693	0.695817		0.0556693	0.0387356	0.695817		21.7927	1.21912	0.847663	0.0559415	0.695308		0.0559415	0.0388966	0.695308		23.893	1.4129	0.981975	0.0591343	0.695007		0.0591343	0.0410988	0.695007
21	16.6922	0.946027	0.658225	0.0566749	0.695779		0.0566749	0.0394332	0.695779		21.2623	1.19218	0.829089	0.05607	0.695443		0.05607	0.0389934	0.695443		29.884	1.69114	1.17551	0.0565903	0.695095		0.0565903	0.0393356	0.695095
22	14.7682	0.802313	0.558413	0.0543272	0.696004		0.0543272	0.0378119	0.696004		20.3719	1.14897	0.799008	0.0563997	0.695412		0.0563997	0.0392211	0.695412		32.8396	1.82285	1.26674	0.0555076	0.694923		0.0555076	0.0385735	0.694923
23	16.0236	0.886678	0.617088	0.0553358	0.695955		0.0553358	0.0385112	0.695955		29.3267	1.60395	1.11487	0.0546924	0.695076		0.0546924	0.0380154	0.695076		24.6133	1.36687	0.94958	0.0555337	0.694712		0.0555337	0.0385799	0.694712
24	14.0912	0.785891	0.547082	0.0557718	0.69613		0.0557718	0.0388244	0.69613		22.8458	1.25751	0.874456	0.0550433	0.695389		0.0550433	0.0382765	0.695389		25.9335	1.47574	1.02575	0.0569045	0.695078		0.0569045	0.0395531	0.695078
25	14.9037	0.835036	0.580883	0.0560288	0.695637		0.0560288	0.0389758	0.695637		27.5089	1.5119	1.05115	0.0549604	0.69525		0.0549604	0.0382112	0.69525		25.0461	1.41357	0.982779	0.0564387	0.695247		0.0564387	0.0392388	0.695247
26	16.1508	0.884176	0.615265	0.0547449	0.695863		0.0547449	0.0380949	0.695863		20.6765	1.16663	0.810998	0.0564231	0.695163		0.0564231	0.0392232	0.695163		27.8423	1.61583	1.12264	0.0580349	0.694777		0.0580349	0.0403213	0.694777
27	14.9522	0.838109	0.583218	0.0560524	0.695874		0.0560524	0.0390054	0.695874		22.8815	1.27643	0.887594	0.0557842	0.695374		0.0557842	0.0387909	0.695374		26.7907	1.51761	1.05518	0.0566466	0.695291		0.0566466	0.0393859	0.695291
28	13.4413	0.724529	0.504267	0.0539033	0.695993		0.0539033	0.0375163	0.695993		23.4038	1.28742	0.894921	0.0550091	0.695127		0.0550091	0.0382383	0.695127		33.181	1.89719	1.31813	0.0571771	0.694778		0.0571771	0.0397254	0.694778
29	13.9121	0.757317	0.527052	0.0544358	0.695947		0.0544358	0.0378845	0.695947		23.9804	1.37699	0.957132	0.0574214	0.695091		0.0574214	0.0399131	0.695091		27.2134	1.54991	1.07722	0.0569541	0.695018		0.0569541	0.0395841	0.695018
30	15.384	0.843409	0.586731	0.0548237	0.695666		0.0548237	0.038139	0.695666		23.8537	1.3322	0.926382	0.0558486	0.695378		0.0558486	0.0388359	0.695378		26.0829	1.4765	1.02613	0.0566077	0.694974		0.0566077	0.0393409	0.694974
31	12.4921	0.680156	0.473479	0.054447	0.696134		0.054447	0.0379024	0.696134		25.6656	1.43771	0.999159	0.0560171	0.694965		0.0560171	0.03893	0.694965		26.5546	1.48167	1.02979	0.0557972	0.695021		0.0557972	0.0387802	0.695021
32	11.9307	0.673498	0.46877	0.056451	0.696022		0.056451	0.0392912	0.696022		24.9194	1.38245	0.960742	0.0554768	0.694957		0.0554768	0.0385539	0.694957		27.9473	1.579	1.09781	0.0564992	0.695255		0.0564992	0.0392814	0.695255
33	14.3243	0.782659	0.544805	0.0546387	0.696095		0.0546387	0.0380337	0.696095		22.3415	1.26615	0.880447	0.0566728	0.695371		0.0566728	0.0394086	0.695371		41.1861	2.33039	1.61962	0.0565819	0.695		0.0565819	0.0393244	0.695
34	14.1809	0.792326	0.551342	0.0558727	0.695853		0.0558727	0.0388792	0.695853		23.5755	1.29732	0.902104	0.0550281	0.695362		0.0550281	0.0382645	0.695362		35.539	1.99415	1.38511	0.0561117	0.694584		0.0561117	0.0389743	0.694584
35	14.7674	0.805465	0.56022	0.0545434	0.695524		0.0545434	0.0379363	0.695524		24.4058	1.3639	0.948075	0.0558842	0.695123		0.0558842	0.0388464	0.695123		35.2915	1.97972	1.37572	0.0560962	0.694906		0.0560962	0.0389816	0.694906
36	13.6712	0.77209	0.537308	0.0564756	0.695913		0.0564756	0.0393021	0.695913		20.4553	1.14919	0.798505	0.0561803	0.694844		0.0561803	0.0390365	0.694844		36.3942	2.02226	1.40553	0.0555654	0.695031		0.0555654	0.0386197	0.695031
37	11.9651	0.65602	0.456522	0.0548276	0.695897		0.0548276	0.0381543	0.695897		18.4785	1.0532	0.732119	0.0569959	0.695137		0.0569959	0.03962	0.695137		32.6084	1.81222	1.25962	0.0555754	0.695072		0.0555754	0.0386289	0.695072
38	13.7726	0.779487	0.542301	0.0565969	0.695716		0.0565969	0.0393753	0.695716		17.723	1.08681	0.757423	0.0613221	0.69692		0.0613221	0.0427366	0.69692		44.4365	2.50315	1.7396	0.0563309	0.694964		0.0563309	0.0391479	0.694964
39	13.7874	0.745257	0.518803	0.0540534	0.69614		0.0540534	0.0376287	0.69614		19.4342	1.07811	0.749629	0.055475	0.695315		0.055475	0.0385726	0.695315		33.8745	1.87966	1.3056	0.055489	0.694595		0.055489	0.0385424	0.694595
40	14.4529	0.789773	0.549437	0.0546444	0.69569		0.0546444	0.0380156	0.69569		21.5676	1.20813	0.840004	0.056016	0.695292		0.056016	0.0389475	0.695292		28.869	1.64373	1.14227	0.0569376	0.694922		0.0569376	0.0395672	0.694922
41	13.1958	0.715259	0.497752	0.0542033	0.695905		0.0542033	0.0377204	0.695905		20.3581	1.11961	0.778211	0.0549958	0.695073		0.0549958	0.0382261	0.695073		25.853	1.47947	1.02789	0.0572261	0.694768		0.0572261	0.0397589	0.694768
42	13.5244	0.81261	0.56543	0.0600848	0.69582		0.0600848	0.0418082	0.69582		23.6443	1.30968	0.910357	0.0553909	0.6951		0.0553909	0.0385022	0.6951		27.1946	1.57962	1.0977	0.058086	0.694915		0.058086	0.0403648	0.694915
43	14.6915	0.806125	0.561036	0.05487	0.695966		0.05487	0.0381877	0.695966		25.3513	1.42529	0.990866	0.0562216	0.695202		0.0562216	0.0390854	0.695202		30.1806	1.68468	1.17122	0.0558201	0.695217		0.0558201	0.038807	0.695217
44	15.0318	0.830896	0.577916	0.0552757	0.695533		0.0552757	0.0384461	0.695533		25.3622	1.40541	0.976655	0.0554136	0.694925		0.0554136	0.0385083	0.694925		36.5265	2.25055	1.56241	0.0616143	0.694231		0.0616143	0.0427746	0.694231
45	13.7127	0.743139	0.517311	0.0541933	0.696116		0.0541933	0.0377248	0.696116		19.8277	1.11537	0.775364	0.0562529	0.695165		0.0562529	0.039105	0.695165		24.9443	1.43313	0.996025	0.0574534	0.694998		0.0574534	0.03993	0.694998
46	14.0327	0.786234	0.546923	0.0560289	0.695624		0.0560289	0.0389751	0.695624		25.1702	1.42168	0.987878	0.0564824	0.694869		0.0564824	0.0392479	0.694869		33.7548	1.95848	1.36131	0.0580206	0.695088		0.0580206	0.0403294	0.695088
47	14.0207	0.764745	0.532171	0.054544	0.69588		0.054544	0.0379561	0.69588		19.8681	1.10759	0.769669	0.0557468	0.694907		0.0557468	0.0387389	0.694907		32.3109	1.83987	1.27837	0.0569429	0.694811		0.0569429	0.0395646	0.694811
48	14.9642	0.852708	0.593149	0.0569834	0.695607		0.0569834	0.039638	0.695607		22.0689	1.28003	0.8897	0.0580013	0.695064		0.0580013	0.0403146	0.695064		35.6383	1.99376	1.38554	0.0559443	0.69494		0.0559443	0.0388779	0.69494
49	15.5691	0.870964	0.605771	0.055942	0.695518		0.055942	0.0389086	0.695518		23.9777	1.41662	0.984384	0.0590806	0.694884		0.0590806	0.0410542	0.694884		37.0519	2.05186	1.42601	0.0553779	0.694987		0.0553779	0.038487	0.694987
50	13.256	0.727269	0.506252	0.0548632	0.696101		0.0548632	0.0381903	0.696101		25.6797	1.4263	0.99113	0.055542	0.694895		0.055542	0.0385958	0.694895		34.941	1.95081	1.35504	0.0558316	0.694602		0.0558316	0.0387808	0.694602
51	12.3347	0.670803	0.467021	0.0543836	0.696212		0.0543836	0.0378625	0.696212		24.9305	1.38972	0.966455	0.0557438	0.695432		0.0557438	0.038766	0.695432		38.9099	2.22464	1.54532	0.0571742	0.694637		0.0571742	0.0397153	0.694637
52	12.9416	0.740391	0.516341	0.0572102	0.697389		0.0572102	0.0398978	0.697389		23.9692	1.42277	0.988579	0.0593581	0.694829		0.0593581	0.0412437	0.694829		30.4951	1.72322	1.19741	0.0565079	0.694866		0.0565079	0.0392654	0.694866
53	12.1498	0.701819	0.488642	0.0577641	0.69625		0.0577641	0.0402183	0.69625		20.6586	1.18542	0.82386	0.0573817	0.694993		0.0573817	0.0398799	0.694993		28.7004	1.60746	1.11674	0.0560082	0.694726		0.0560082	0.0389104	0.694726
54	12.1913	0.665252	0.463191	0.0545677	0.696264		0.0545677	0.0379935	0.696264		23.2812	1.36279	0.947101	0.058536	0.694973		0.058536	0.0406809	0.694973		33.1241	1.86705	1.29766	0.0563652	0.695034		0.0563652	0.0391758	0.695034
55	12.063	0.71134	0.497995	0.0589689	0.70008		0.0589689	0.041283	0.70008		29.5408	1.65406	1.14943	0.0559924	0.694912		0.0559924	0.0389097	0.694912		30.8833	1.7315	1.20309	0.056066	0.694823		0.056066	0.038956	0.694823
56	10.909	0.65292	0.454245	0.0598517	0.695713		0.0598517	0.0416396	0.695713		23.3721	1.3313	0.925064	0.0569612	0.694858		0.0569612	0.0395799	0.694858		31.6629	1.76874	1.22948	0.0558618	0.695116		0.0558618	0.0388304	0.695116
57	14.0597	0.760267	0.529092	0.0540743	0.695929		0.0540743	0.0376319	0.695929		20.2301	1.12927	0.785018	0.0558215	0.695152		0.0558215	0.0388044	0.695152		33.2321	1.88788	1.3115	0.056809	0.694696		0.056809	0.039465	0.694696
58	14.3038	0.780126	0.542934	0.0545399	0.695957		0.0545399	0.0379574	0.695957		23.4938	1.32106	0.918512	0.0562302	0.695285		0.0562302	0.039096	0.695285		30.4503	1.69634	1.17915	0.0557085	0.695114		0.0557085	0.0387237	0.695114
59	12.9569	0.723402	0.503445	0.0558314	0.695941		0.0558314	0.0388554	0.695941		26.5681	1.49608	1.03967	0.0563109	0.694928		0.0563109	0.039132	0.694928		33.9323	1.93822	1.34649	0.0571203	0.694703		0.0571203	0.0396816	0.694703
60	14.3722	0.790491	0.549999	0.0550015	0.69577		0.0550015	0.0382684	0.69577		24.4982	1.54118	1.07064	0.0629099	0.69469		0.0629099	0.0437028	0.69469		27.9683	1.55767	1.08252	0.0556941	0.694961		0.0556941	0.0387053	0.694961
***	L4	C	H4	C | L4	H4 | C						L4	C	H4	C | L4	H4 | C						L4	C	H4	C | L4	H4 | C
***	tbdgy	tbdgy	tbdgy	tbdgy - St	tbdgy - St						tbdgy	tbdgy	tbdgy	tbdgy - St	tbdgy - St						tbdgy	tbdgy	tbdgy	tbdgy - St	tbdgy - St
***	15.7459	0.869563	0.605173	0.0552867	0.705565	av	0.0552867	0.038988	0.705565		25.3023	1.44155	1.00221	0.0565058	0.700165	av	0.0565058	0.0395449	0.700165		31.196	1.79486	1.24743	0.0570466	0.699582	av	0.0570466	0.0398898	0.699582
***	4.69123	4.56887	4.56208	0.33421	0.954987	stabw	0.00143125	0.0026763	0.0521927		4.45302	5.00518	5.00247	0.619122	0.663712	stabw	0.00270985	0.00240366	0.0359961		3.55316	4.18883	4.18698	0.839156	0.630162	stabw	0.00370807	0.00291355	0.0341481
***	0.738677	0.0397293	0.0276085	0.000184774	0.00673805	stabw/(n)^0.5	0.000184774	0.000345509	0.00673805		1.12672	0.0721521	0.0501352	0.00034984	0.00464708	stabw/(n)^0.5	0.00034984	0.000310311	0.00464708		1.10844	0.0751835	0.0522296	0.00047871	0.0044085	stabw/(n)^0.5	0.00047871	0.000376138	0.0044085
***	36.3381	35.3903	35.3377	2.58878	7.3973	(stabw/(n)^0.5)/av /%	0.0033421	0.00886193	0.00954987		34.493	38.77	38.749	4.7957	5.14109	(stabw/(n)^0.5)/av /%	0.00619122	0.00784706	0.00663712		27.5226	32.4465	32.4322	6.50007	4.88122	(stabw/(n)^0.5)/av /%	0.00839156	0.00942943	0.00630162
***	5.72177	0.307741	0.213854	0.00143125	0.0521927						8.72752	0.558888	0.388346	0.00270985	0.0359961						8.58596	0.582369	0.404569	0.00370807	0.0341481
	WASO04 Laserablation (long sample tube "SQUID"))
	1st run						not blank corr				2nd run						not blank corr				3rd run						not blank corr
Cycle	27.94	28.925	29.916	28.925/27.94 (1)	29.916/28.925 (2)		29/28	30/28	30/29		27.94	28.925	29.916	28.925/27.94 (1)	29.916/28.925 (2)		29/28	30/28	30/29		27.94	28.925	29.916	28.925/27.94 (1)	29.916/28.925 (2)		29/28	30/28	30/29
1	0.0995184	0.00531422	0.00485899	0.0533994	0.914338		0.0533994	0.048825	0.914338		0.449488	0.0358178	0.0260096	0.0796857	0.726163		0.0796857	0.0578648	0.726163		0.1028	0.00543739	0.00490462	0.0528928	0.902018		0.0528928	0.0477102	0.902018
2	0.098109	0.00520121	0.00488762	0.0530146	0.939707		0.0530146	0.0498182	0.939707		0.104033	0.00554298	0.00499726	0.0532811	0.901548		0.0532811	0.0480355	0.901548		0.102823	0.00546112	0.00485259	0.0531119	0.88857		0.0531119	0.0471936	0.88857
3	0.096554	0.00509781	0.00480553	0.0527975	0.942667		0.0527975	0.0497704	0.942667		0.10311	0.00547975	0.00499495	0.0531449	0.911528		0.0531449	0.048443	0.911528		0.101934	0.00546316	0.00480662	0.053595	0.879824		0.053595	0.0471541	0.879824
4	0.0953753	0.00503159	0.00474886	0.0527556	0.94381		0.0527556	0.0497913	0.94381		0.101882	0.00539454	0.0049195	0.0529491	0.911942		0.0529491	0.0482865	0.911942		0.232404	0.0144277	0.0110258	0.0620802	0.76421		0.0620802	0.0474423	0.76421
5	0.106669	0.00568477	0.0050666	0.0532936	0.891258		0.0532936	0.0474984	0.891258		0.104855	0.00560268	0.00500416	0.0534324	0.893172		0.0534324	0.0477243	0.893172		0.102201	0.0054595	0.00494745	0.0534195	0.906209		0.0534195	0.0484092	0.906209
6	0.979908	0.0520494	0.0374582	0.0531166	0.719667		0.0531166	0.0382263	0.719667		0.727132	0.0385228	0.0279828	0.0529792	0.726395		0.0529792	0.0384838	0.726395		0.679859	0.0374136	0.0271173	0.0550314	0.724797		0.0550314	0.0398866	0.724797
7	15.1793	0.811742	0.565612	0.0534769	0.696788		0.0534769	0.0372621	0.696788		7.64717	0.418314	0.291883	0.0547018	0.697761		0.0547018	0.0381688	0.697761		7.55151	0.403291	0.281648	0.0534054	0.698373		0.0534054	0.0372969	0.698373
8	31.9735	1.71031	1.19009	0.0534914	0.695835		0.0534914	0.0372212	0.695835		22.4461	1.20629	0.840031	0.0537418	0.696374		0.0537418	0.0374244	0.696374		20.3817	1.0892	0.758112	0.0534403	0.696024		0.0534403	0.0371958	0.696024
9	38.4676	2.05358	1.42836	0.0533848	0.695545		0.0533848	0.0371315	0.695545		29.0366	1.55846	1.08441	0.0536725	0.69582		0.0536725	0.0373464	0.69582		28.2735	1.55159	1.07938	0.0548779	0.695664		0.0548779	0.0381765	0.695664
10	37.3382	2.00415	1.39396	0.0536755	0.695536		0.0536755	0.0373333	0.695536		28.0798	1.50505	1.04693	0.0535991	0.695613		0.0535991	0.0372842	0.695613		33.7641	1.82122	1.26638	0.0539394	0.695346		0.0539394	0.0375066	0.695346
11	32.5962	1.74188	1.21134	0.0534383	0.695417		0.0534383	0.0371619	0.695417		27.7491	1.48701	1.03407	0.0535875	0.695405		0.0535875	0.037265	0.695405		29.2936	1.56941	1.09149	0.0535752	0.695474		0.0535752	0.0372602	0.695474
12	32.3456	1.75627	1.22151	0.0542969	0.695514		0.0542969	0.0377643	0.695514		25.7133	1.39411	0.970103	0.0542175	0.695859		0.0542175	0.0377277	0.695859		28.0565	1.54945	1.07725	0.0552261	0.695245		0.0552261	0.0383957	0.695245
13	30.6812	1.66074	1.15536	0.0541288	0.69569		0.0541288	0.0376569	0.69569		25.7597	1.37624	0.957346	0.0534262	0.695624		0.0534262	0.0371645	0.695624		28.2899	1.53219	1.06577	0.0541606	0.695581		0.0541606	0.037673	0.695581
14	29.1286	1.58441	1.10231	0.0543937	0.69572		0.0543937	0.0378428	0.69572		26.2645	1.40084	0.974635	0.0533358	0.695749		0.0533358	0.0371084	0.695749		29.2038	1.57415	1.09469	0.0539022	0.695416		0.0539022	0.0374845	0.695416
15	29.1126	1.63371	1.13861	0.0561168	0.696948		0.0561168	0.0391105	0.696948		25.2894	1.43187	1.00782	0.0566195	0.703847		0.0566195	0.0398515	0.703847		30.6411	1.6409	1.14109	0.0535524	0.695405		0.0535524	0.0372406	0.695405
16	28.3741	1.51838	1.05619	0.053513	0.695602		0.053513	0.0372237	0.695602		23.6446	1.28013	0.890655	0.0541404	0.695755		0.0541404	0.0376684	0.695755		30.1792	1.62874	1.13279	0.0539689	0.695502		0.0539689	0.0375355	0.695502
17	29.3166	1.59156	1.10695	0.0542888	0.695513		0.0542888	0.0377586	0.695513		25.4004	1.36611	0.950391	0.0537831	0.695692		0.0537831	0.0374165	0.695692		26.9332	1.44085	1.00225	0.0534973	0.695595		0.0534973	0.0372124	0.695595
18	31.1221	1.80696	1.25607	0.0580603	0.695128		0.0580603	0.0403593	0.695128		25.3584	1.35682	0.943543	0.0535059	0.695405		0.0535059	0.0372083	0.695405		26.4004	1.40764	0.97906	0.053319	0.695532		0.053319	0.0370851	0.695532
19	32.5363	1.81877	1.26502	0.0558999	0.695537		0.0558999	0.0388804	0.695537		25.0074	1.3371	0.930179	0.053468	0.695672		0.053468	0.0371962	0.695672		29.0631	1.60686	1.11757	0.0552886	0.695503		0.0552886	0.0384534	0.695503
20	31.3756	1.68939	1.17484	0.053844	0.695421		0.053844	0.0374442	0.695421		25.9891	1.38532	0.963671	0.0533039	0.69563		0.0533039	0.0370798	0.69563		32.219	1.75399	1.21947	0.0544396	0.695254		0.0544396	0.0378494	0.695254
21	32.6417	1.77173	1.23177	0.0542781	0.695236		0.0542781	0.0377361	0.695236		29.2092	1.62605	1.13036	0.055669	0.695155		0.055669	0.0386986	0.695155		30.1823	1.6289	1.13218	0.0539686	0.695059		0.0539686	0.0375114	0.695059
22	33.8963	1.95431	1.35945	0.0576556	0.695613		0.0576556	0.040106	0.695613		27.7037	1.49765	1.04158	0.0540596	0.695479		0.0540596	0.0375973	0.695479		27.5719	1.62863	1.13897	0.0590685	0.699343		0.0590685	0.0413091	0.699343
23	35.0704	1.98391	1.37895	0.0565692	0.695068		0.0565692	0.0393194	0.695068		29.2011	1.73634	1.22144	0.0594615	0.703454		0.0594615	0.0418284	0.703454		25.4374	1.41206	0.981398	0.0555112	0.695011		0.0555112	0.0385809	0.695011
24	31.8818	1.76069	1.22426	0.0552257	0.69533		0.0552257	0.0384001	0.69533		32.1779	1.73965	1.20988	0.0540635	0.695472		0.0540635	0.0375996	0.695472		27.5662	1.47691	1.02731	0.0535767	0.695582		0.0535767	0.037267	0.695582
25	31.6419	1.74348	1.21227	0.0551003	0.695316		0.0551003	0.0383122	0.695316		31.4475	1.73525	1.20653	0.0551793	0.695308		0.0551793	0.0383666	0.695308		31.7149	1.73208	1.20467	0.054614	0.695505		0.054614	0.0379843	0.695505
26	31.2512	1.74636	1.21417	0.0558814	0.69526		0.0558814	0.0388521	0.69526		33.2693	1.86952	1.30109	0.0561936	0.695946		0.0561936	0.0391077	0.695946		31.1403	1.6813	1.16901	0.053991	0.695306		0.053991	0.0375403	0.695306
27	35.917	1.92365	1.33754	0.0535581	0.695313		0.0535581	0.0372397	0.695313		30.3963	1.62973	1.13317	0.0536161	0.695315		0.0536161	0.03728	0.695315		29.0063	1.56815	1.09023	0.0540626	0.695233		0.0540626	0.0375861	0.695233
28	33.2279	1.87192	1.30133	0.0563357	0.695183		0.0563357	0.0391636	0.695183		30.5412	1.65567	1.15127	0.054211	0.695351		0.054211	0.0376957	0.695351		28.6843	1.54233	1.0727	0.0537693	0.695504		0.0537693	0.0373968	0.695504
29	31.5784	1.70635	1.18647	0.0540353	0.695326		0.0540353	0.0375722	0.695326		29.7754	1.59902	1.11216	0.0537029	0.695526		0.0537029	0.0373517	0.695526		27.5004	1.46844	1.02106	0.0533971	0.695337		0.0533971	0.037129	0.695337
30	32.9847	1.79408	1.24762	0.0543913	0.695411		0.0543913	0.0378243	0.695411		29.6429	1.64939	1.1464	0.0556421	0.695043		0.0556421	0.0386736	0.695043		25.5019	1.36527	0.949554	0.053536	0.695507		0.053536	0.0372347	0.695507
31	35.4142	1.91124	1.32896	0.0539681	0.695339		0.0539681	0.0375261	0.695339		29.2255	1.62492	1.131	0.0555995	0.696035		0.0555995	0.0386992	0.696035		25.2453	1.36265	0.947823	0.0539767	0.695571		0.0539767	0.0375446	0.695571
32	35.0738	1.93883	1.34779	0.0552785	0.695158		0.0552785	0.0384273	0.695158		29.5511	1.6811	1.16863	0.056888	0.695157		0.056888	0.0395461	0.695157		24.8184	1.33283	0.926857	0.0537034	0.695404		0.0537034	0.0373456	0.695404
33	35.3581	1.91915	1.33423	0.0542774	0.695219		0.0542774	0.0377347	0.695219		30.2896	1.62499	1.1302	0.0536483	0.695512		0.0536483	0.0373131	0.695512		26.0086	1.42578	0.991859	0.0548194	0.695662		0.0548194	0.0381358	0.695662
34	32.9261	1.77376	1.23308	0.0538708	0.695181		0.0538708	0.03745	0.695181		29.3201	1.58168	1.09994	0.0539452	0.695425		0.0539452	0.0375149	0.695425		26.2937	1.541	1.07659	0.0586071	0.698631		0.0586071	0.0409448	0.698631
35	35.4653	1.90188	1.32243	0.0536265	0.695329		0.0536265	0.0372881	0.695329		30.6559	1.6348	1.13675	0.0533274	0.695346		0.0533274	0.037081	0.695346		28.2036	1.58525	1.10213	0.0562075	0.695237		0.0562075	0.0390775	0.695237
36	36.5974	1.98497	1.37999	0.0542378	0.695221		0.0542378	0.0377073	0.695221		28.8038	1.57338	1.09407	0.0546241	0.695364		0.0546241	0.0379837	0.695364		25.552	1.37637	0.95702	0.0538656	0.695321		0.0538656	0.0374539	0.695321
37	37.8656	2.01922	1.40434	0.0533261	0.695486		0.0533261	0.0370875	0.695486		29.562	1.72467	1.19846	0.0583408	0.694894		0.0583408	0.0405407	0.694894		26.6945	1.55514	1.08966	0.0582567	0.700682		0.0582567	0.0408194	0.700682
38	37.4027	2.10154	1.46075	0.0561868	0.695084		0.0561868	0.0390545	0.695084		28.8208	1.53823	1.06951	0.0533724	0.695286		0.0533724	0.037109	0.695286		25.7371	1.38472	0.962876	0.0538023	0.69536		0.0538023	0.037412	0.69536
39	34.8686	1.8789	1.30645	0.0538851	0.695328		0.0538851	0.0374678	0.695328		32.5466	1.74791	1.21566	0.0537048	0.695497		0.0537048	0.0373515	0.695497		24.624	1.31162	0.912257	0.0532661	0.695517		0.0532661	0.0370475	0.695517
40	32.6612	1.74239	1.21168	0.0533474	0.695415		0.0533474	0.0370986	0.695415		31.9113	1.86599	1.2966	0.0584742	0.694857		0.0584742	0.0406312	0.694857		26.7106	1.47813	1.02771	0.0553386	0.69528		0.0553386	0.0384758	0.69528
41	32.3032	1.72382	1.19878	0.0533638	0.695417		0.0533638	0.0371101	0.695417		31.4197	1.69302	1.17737	0.0538839	0.695428		0.0538839	0.0374724	0.695428		26.0645	1.49289	1.03761	0.0572768	0.695034		0.0572768	0.0398093	0.695034
42	31.031	1.67941	1.16772	0.0541204	0.695315		0.0541204	0.0376307	0.695315		28.9636	1.54385	1.07367	0.0533032	0.695448		0.0533032	0.0370696	0.695448		24.7679	1.32929	0.925449	0.0536698	0.696197		0.0536698	0.0373648	0.696197
43	34.4554	1.84579	1.28352	0.0535706	0.695378		0.0535706	0.0372518	0.695378		27.9545	1.5673	1.09456	0.0560662	0.698371		0.0560662	0.039155	0.698371		26.7836	1.45536	1.01186	0.0543375	0.695266		0.0543375	0.037779	0.695266
44	33.6326	2.10427	1.46205	0.0625663	0.694805		0.0625663	0.0434714	0.694805		28.8089	1.54349	1.07337	0.053577	0.695417		0.053577	0.0372584	0.695417		26.2337	1.42722	0.992649	0.0544038	0.695514		0.0544038	0.0378386	0.695514
45	33.1643	1.85455	1.2889	0.0559201	0.694993		0.0559201	0.0388641	0.694993		26.2478	1.41637	0.985047	0.0539613	0.695476		0.0539613	0.0375287	0.695476		27.1376	1.48058	1.02968	0.0545584	0.695457		0.0545584	0.037943	0.695457
46	30.8628	1.71193	1.19	0.055469	0.695122		0.055469	0.0385577	0.695122		28.6877	1.69433	1.17763	0.0590613	0.695038		0.0590613	0.0410499	0.695038		26.2731	1.40698	0.978443	0.0535522	0.695419		0.0535522	0.0372413	0.695419
47	31.7615	1.70153	1.18295	0.053572	0.695227		0.053572	0.0372447	0.695227		25.5953	1.428	0.992875	0.0557916	0.695289		0.0557916	0.0387912	0.695289		24.5847	1.31159	0.912301	0.05335	0.695567		0.05335	0.0371085	0.695567
48	30.902	1.67987	1.16833	0.0543613	0.695486		0.0543613	0.0378075	0.695486		29.9821	1.65649	1.15601	0.0552492	0.697871		0.0552492	0.0385568	0.697871		26.3628	1.4864	1.03816	0.0563825	0.69844		0.0563825	0.0393798	0.69844
49	31.9117	1.70187	1.18349	0.0533305	0.695407		0.0533305	0.0370864	0.695407		24.5431	1.37957	0.961818	0.0562101	0.697188		0.0562101	0.039189	0.697188		25.7133	1.4707	1.02209	0.0571959	0.694969		0.0571959	0.0397494	0.694969
50	31.1411	1.73278	1.20465	0.0556428	0.695213		0.0556428	0.0386836	0.695213		29.5963	1.59005	1.10567	0.0537246	0.695369		0.0537246	0.0373584	0.695369		21.4035	1.14253	0.794741	0.0533807	0.695597		0.0533807	0.0371314	0.695597
51	30.583	1.63036	1.13377	0.0533093	0.69541		0.0533093	0.0370718	0.69541		28.9209	1.70075	1.1925	0.0588071	0.701162		0.0588071	0.0412333	0.701162		22.3377	1.23185	0.856693	0.0551466	0.695452		0.0551466	0.0383518	0.695452
52	27.2507	1.5372	1.06852	0.0564094	0.695107		0.0564094	0.0392106	0.695107		29.8355	1.67179	1.16248	0.0560336	0.695348		0.0560336	0.0389629	0.695348		22.6812	1.26908	0.882635	0.0559531	0.695491		0.0559531	0.0389149	0.695491
53	29.7415	1.58909	1.10536	0.0534301	0.695594		0.0534301	0.0371656	0.695594		26.5567	1.44631	1.00576	0.0544612	0.695394		0.0544612	0.037872	0.695394		22.9754	1.2261	0.852912	0.0533656	0.695632		0.0533656	0.0371228	0.695632
54	29.1733	1.56332	1.08689	0.0535874	0.695246		0.0535874	0.0372564	0.695246		24.5553	1.40026	0.973256	0.0570247	0.695054		0.0570247	0.0396352	0.695054		22.4741	1.32285	0.930517	0.0588612	0.703418		0.0588612	0.041404	0.703418
55	28.7034	1.60659	1.11662	0.055972	0.695026		0.055972	0.038902	0.695026		25.1761	1.40379	0.976178	0.055759	0.695385		0.055759	0.038774	0.695385		23.7437	1.28164	0.891594	0.0539782	0.695665		0.0539782	0.0375507	0.695665
56	27.791	1.58435	1.10141	0.0570095	0.695178		0.0570095	0.0396317	0.695178		25.1809	1.46968	1.02179	0.0583647	0.695245		0.0583647	0.0405778	0.695245		22.8544	1.30993	0.911056	0.0573163	0.695499		0.0573163	0.0398634	0.695499
57	27.0243	1.441	1.00225	0.0533224	0.695523		0.0533224	0.0370869	0.695523		25.3826	1.39839	0.972362	0.0550926	0.695343		0.0550926	0.0383083	0.695343		25.1349	1.35584	0.942572	0.0539426	0.695192		0.0539426	0.0375005	0.695192
58	27.9426	1.49336	1.03863	0.053444	0.695497		0.053444	0.0371702	0.695497		26.4383	1.43701	0.999033	0.0543535	0.695215		0.0543535	0.0377873	0.695215		25.9958	1.42316	0.989463	0.0547459	0.695256		0.0547459	0.0380624	0.695256
59	27.0455	1.51061	1.0501	0.0558544	0.69515		0.0558544	0.0388272	0.69515		27.6129	1.49855	1.04203	0.05427	0.695359		0.05427	0.0377371	0.695359		25.2878	1.36195	0.947071	0.0538578	0.695381		0.0538578	0.0374517	0.695381
60	28.5969	1.63178	1.13463	0.0570613	0.695331		0.0570613	0.0396765	0.695331		27.2658	1.53083	1.06437	0.0561447	0.695291		0.0561447	0.0390369	0.695291		25.8696	1.38435	0.962662	0.0535128	0.695387		0.0535128	0.0372121	0.695387
***	L4	C	H4	C | L4	H4 | C						L4	C	H4	C | L4	H4 | C						L4	C	H4	C | L4	H4 | C
***	tbdgy	tbdgy	tbdgy	tbdgy - St	tbdgy - St						tbdgy	tbdgy	tbdgy	tbdgy - St	tbdgy - St						tbdgy	tbdgy	tbdgy	tbdgy - St	tbdgy - St
***	28.6628	1.5702	1.092	0.0546123	0.715048	av	0.0546123	0.0390192	0.715048		24.9625	1.37343	0.956035	0.0552573	0.710934	av	0.0552573	0.0392679	0.710934		23.6741	1.29452	0.900944	0.0547142	0.710757	av	0.0547142	0.038879	0.710757
***	4.58163	4.59563	4.59021	0.396417	1.16644	stabw	0.00167694	0.00327914	0.0646059		4.66263	4.68658	4.68207	0.847537	0.953993	stabw	0.00362764	0.00366661	0.0525352		4.71943	4.72246	4.71706	0.42347	0.915986	stabw	0.00179473	0.0028691	0.0504296
***	1.31322	0.0721606	0.0501252	0.000216492	0.00834058	stabw/(n)^0.5	0.000216492	0.000423335	0.00834058		1.16391	0.0643669	0.0447622	0.000468326	0.00678227	stabw/(n)^0.5	0.000468326	0.000473357	0.00678227		1.11728	0.0611331	0.0424981	0.000231698	0.00651044	stabw/(n)^0.5	0.000231698	0.0003704	0.00651044
***	35.4892	35.5976	35.5556	3.07063	9.03518	(stabw/(n)^0.5)/av /%	0.00396417	0.0108494	0.0116644		36.1166	36.3021	36.2672	6.565	7.3896	(stabw/(n)^0.5)/av /%	0.00847537	0.0120546	0.00953993		36.5565	36.58	36.5382	3.28019	7.0952	(stabw/(n)^0.5)/av /%	0.0042347	0.009527	0.00915986
***	10.1722	0.558953	0.388268	0.00167694	0.0646059						9.01561	0.498584	0.346727	0.00362764	0.0525352						8.65443	0.473535	0.329189	0.00179473	0.0504296

## Sheet: Laser tube wo outlier
	Laserablation - lasertube characterization
	solid samples		WASO04
	dissolved sample		WASO04 4 µg/g
	Neptune XT
	ESI NWR213
	without first ten data (outlier)
	WASO04 Laserablation (short sample tube)
	1st run						not blank corr				2nd run						not blank corr				3rd run						not blank corr
Cycle	27.94	28.925	29.916	28.925/27.94 (1)	29.916/28.925 (2)		29/28	30/28	30/29		27.94	28.925	29.916	28.925/27.94 (1)	29.916/28.925 (2)		29/28	30/28	30/29		27.94	28.925	29.916	28.925/27.94 (1)	29.916/28.925 (2)		29/28	30/28	30/29
11	21.1351	1.15381	0.80281	0.0545918	0.695793		0.0545918	0.0379846	0.695793		30.0093	1.66646	1.15871	0.0555314	0.695312		0.0555314	0.0386117	0.695312		29.9924	1.68865	1.17366	0.0563027	0.69503		0.0563027	0.0391321	0.69503
12	20.8008	1.1716	0.814818	0.0563247	0.695476		0.0563247	0.0391725	0.695476		31.9102	1.75351	1.21919	0.0549512	0.695287		0.0549512	0.0382069	0.695287		27.7792	1.55405	1.08012	0.055943	0.695035		0.055943	0.0388823	0.695035
13	17.6589	0.984614	0.685119	0.0557574	0.695825		0.0557574	0.0387974	0.695825		27.5794	1.5083	1.04888	0.0546893	0.695405		0.0546893	0.0380312	0.695405		29.3594	1.68901	1.17378	0.0575287	0.694954		0.0575287	0.0399798	0.694954
14	21.8698	1.18684	0.825369	0.0542685	0.695434		0.0542685	0.0377402	0.695434		25.7776	1.40472	0.976666	0.0544938	0.695273		0.0544938	0.0378881	0.695273		25.716	1.44242	1.00285	0.0560904	0.695258		0.0560904	0.0389973	0.695258
15	20.3439	1.12242	0.780887	0.0551721	0.69572		0.0551721	0.0383843	0.69572		23.6253	1.31383	0.9139	0.0556114	0.695598		0.0556114	0.0386831	0.695598		27.2893	1.55543	1.08101	0.0569977	0.694992		0.0569977	0.0396129	0.694992
16	16.8463	0.914396	0.636227	0.0542788	0.695789		0.0542788	0.0377666	0.695789		25.6656	1.4342	0.997404	0.05588	0.695444		0.05588	0.0388614	0.695444		28.5863	1.59274	1.10804	0.0557171	0.695682		0.0557171	0.0387614	0.695682
17	16.9923	0.939304	0.653534	0.0552782	0.695764		0.0552782	0.0384606	0.695764		25.3997	1.38535	0.963533	0.0545421	0.695514		0.0545421	0.0379348	0.695514		29.6715	1.68363	1.16974	0.0567425	0.694772		0.0567425	0.0394231	0.694772
18	16.5459	0.892797	0.621137	0.0539589	0.69572		0.0539589	0.0375403	0.69572		29.2574	1.62579	1.1299	0.0555684	0.694985		0.0555684	0.0386192	0.694985		22.391	1.27377	0.885118	0.0568877	0.694878		0.0568877	0.03953	0.694878
19	16.4716	0.908806	0.632202	0.055174	0.69564		0.055174	0.0383812	0.69564		22.5931	1.2611	0.876931	0.0558177	0.695372		0.0558177	0.0388141	0.695372		22.7227	1.3139	0.913259	0.0578234	0.695074		0.0578234	0.0401915	0.695074
20	15.8132	0.880308	0.612533	0.0556693	0.695817		0.0556693	0.0387356	0.695817		21.7927	1.21912	0.847663	0.0559415	0.695308		0.0559415	0.0388966	0.695308		23.893	1.4129	0.981975	0.0591343	0.695007		0.0591343	0.0410988	0.695007
21	16.6922	0.946027	0.658225	0.0566749	0.695779		0.0566749	0.0394332	0.695779		21.2623	1.19218	0.829089	0.05607	0.695443		0.05607	0.0389934	0.695443		29.884	1.69114	1.17551	0.0565903	0.695095		0.0565903	0.0393356	0.695095
22	14.7682	0.802313	0.558413	0.0543272	0.696004		0.0543272	0.0378119	0.696004		20.3719	1.14897	0.799008	0.0563997	0.695412		0.0563997	0.0392211	0.695412		32.8396	1.82285	1.26674	0.0555076	0.694923		0.0555076	0.0385735	0.694923
23	16.0236	0.886678	0.617088	0.0553358	0.695955		0.0553358	0.0385112	0.695955		29.3267	1.60395	1.11487	0.0546924	0.695076		0.0546924	0.0380154	0.695076		24.6133	1.36687	0.94958	0.0555337	0.694712		0.0555337	0.0385799	0.694712
24	14.0912	0.785891	0.547082	0.0557718	0.69613		0.0557718	0.0388244	0.69613		22.8458	1.25751	0.874456	0.0550433	0.695389		0.0550433	0.0382765	0.695389		25.9335	1.47574	1.02575	0.0569045	0.695078		0.0569045	0.0395531	0.695078
25	14.9037	0.835036	0.580883	0.0560288	0.695637		0.0560288	0.0389758	0.695637		27.5089	1.5119	1.05115	0.0549604	0.69525		0.0549604	0.0382112	0.69525		25.0461	1.41357	0.982779	0.0564387	0.695247		0.0564387	0.0392388	0.695247
26	16.1508	0.884176	0.615265	0.0547449	0.695863		0.0547449	0.0380949	0.695863		20.6765	1.16663	0.810998	0.0564231	0.695163		0.0564231	0.0392232	0.695163		27.8423	1.61583	1.12264	0.0580349	0.694777		0.0580349	0.0403213	0.694777
27	14.9522	0.838109	0.583218	0.0560524	0.695874		0.0560524	0.0390054	0.695874		22.8815	1.27643	0.887594	0.0557842	0.695374		0.0557842	0.0387909	0.695374		26.7907	1.51761	1.05518	0.0566466	0.695291		0.0566466	0.0393859	0.695291
28	13.4413	0.724529	0.504267	0.0539033	0.695993		0.0539033	0.0375163	0.695993		23.4038	1.28742	0.894921	0.0550091	0.695127		0.0550091	0.0382383	0.695127		33.181	1.89719	1.31813	0.0571771	0.694778		0.0571771	0.0397254	0.694778
29	13.9121	0.757317	0.527052	0.0544358	0.695947		0.0544358	0.0378845	0.695947		23.9804	1.37699	0.957132	0.0574214	0.695091		0.0574214	0.0399131	0.695091		27.2134	1.54991	1.07722	0.0569541	0.695018		0.0569541	0.0395841	0.695018
30	15.384	0.843409	0.586731	0.0548237	0.695666		0.0548237	0.038139	0.695666		23.8537	1.3322	0.926382	0.0558486	0.695378		0.0558486	0.0388359	0.695378		26.0829	1.4765	1.02613	0.0566077	0.694974		0.0566077	0.0393409	0.694974
31	12.4921	0.680156	0.473479	0.054447	0.696134		0.054447	0.0379024	0.696134		25.6656	1.43771	0.999159	0.0560171	0.694965		0.0560171	0.03893	0.694965		26.5546	1.48167	1.02979	0.0557972	0.695021		0.0557972	0.0387802	0.695021
32	11.9307	0.673498	0.46877	0.056451	0.696022		0.056451	0.0392912	0.696022		24.9194	1.38245	0.960742	0.0554768	0.694957		0.0554768	0.0385539	0.694957		27.9473	1.579	1.09781	0.0564992	0.695255		0.0564992	0.0392814	0.695255
33	14.3243	0.782659	0.544805	0.0546387	0.696095		0.0546387	0.0380337	0.696095		22.3415	1.26615	0.880447	0.0566728	0.695371		0.0566728	0.0394086	0.695371		41.1861	2.33039	1.61962	0.0565819	0.695		0.0565819	0.0393244	0.695
34	14.1809	0.792326	0.551342	0.0558727	0.695853		0.0558727	0.0388792	0.695853		23.5755	1.29732	0.902104	0.0550281	0.695362		0.0550281	0.0382645	0.695362		35.539	1.99415	1.38511	0.0561117	0.694584		0.0561117	0.0389743	0.694584
35	14.7674	0.805465	0.56022	0.0545434	0.695524		0.0545434	0.0379363	0.695524		24.4058	1.3639	0.948075	0.0558842	0.695123		0.0558842	0.0388464	0.695123		35.2915	1.97972	1.37572	0.0560962	0.694906		0.0560962	0.0389816	0.694906
36	13.6712	0.77209	0.537308	0.0564756	0.695913		0.0564756	0.0393021	0.695913		20.4553	1.14919	0.798505	0.0561803	0.694844		0.0561803	0.0390365	0.694844		36.3942	2.02226	1.40553	0.0555654	0.695031		0.0555654	0.0386197	0.695031
37	11.9651	0.65602	0.456522	0.0548276	0.695897		0.0548276	0.0381543	0.695897		18.4785	1.0532	0.732119	0.0569959	0.695137		0.0569959	0.03962	0.695137		32.6084	1.81222	1.25962	0.0555754	0.695072		0.0555754	0.0386289	0.695072
38	13.7726	0.779487	0.542301	0.0565969	0.695716		0.0565969	0.0393753	0.695716		17.723	1.08681	0.757423	0.0613221	0.69692		0.0613221	0.0427366	0.69692		44.4365	2.50315	1.7396	0.0563309	0.694964		0.0563309	0.0391479	0.694964
39	13.7874	0.745257	0.518803	0.0540534	0.69614		0.0540534	0.0376287	0.69614		19.4342	1.07811	0.749629	0.055475	0.695315		0.055475	0.0385726	0.695315		33.8745	1.87966	1.3056	0.055489	0.694595		0.055489	0.0385424	0.694595
40	14.4529	0.789773	0.549437	0.0546444	0.69569		0.0546444	0.0380156	0.69569		21.5676	1.20813	0.840004	0.056016	0.695292		0.056016	0.0389475	0.695292		28.869	1.64373	1.14227	0.0569376	0.694922		0.0569376	0.0395672	0.694922
41	13.1958	0.715259	0.497752	0.0542033	0.695905		0.0542033	0.0377204	0.695905		20.3581	1.11961	0.778211	0.0549958	0.695073		0.0549958	0.0382261	0.695073		25.853	1.47947	1.02789	0.0572261	0.694768		0.0572261	0.0397589	0.694768
42	13.5244	0.81261	0.56543	0.0600848	0.69582		0.0600848	0.0418082	0.69582		23.6443	1.30968	0.910357	0.0553909	0.6951		0.0553909	0.0385022	0.6951		27.1946	1.57962	1.0977	0.058086	0.694915		0.058086	0.0403648	0.694915
43	14.6915	0.806125	0.561036	0.05487	0.695966		0.05487	0.0381877	0.695966		25.3513	1.42529	0.990866	0.0562216	0.695202		0.0562216	0.0390854	0.695202		30.1806	1.68468	1.17122	0.0558201	0.695217		0.0558201	0.038807	0.695217
44	15.0318	0.830896	0.577916	0.0552757	0.695533		0.0552757	0.0384461	0.695533		25.3622	1.40541	0.976655	0.0554136	0.694925		0.0554136	0.0385083	0.694925		36.5265	2.25055	1.56241	0.0616143	0.694231		0.0616143	0.0427746	0.694231
45	13.7127	0.743139	0.517311	0.0541933	0.696116		0.0541933	0.0377248	0.696116		19.8277	1.11537	0.775364	0.0562529	0.695165		0.0562529	0.039105	0.695165		24.9443	1.43313	0.996025	0.0574534	0.694998		0.0574534	0.03993	0.694998
46	14.0327	0.786234	0.546923	0.0560289	0.695624		0.0560289	0.0389751	0.695624		25.1702	1.42168	0.987878	0.0564824	0.694869		0.0564824	0.0392479	0.694869		33.7548	1.95848	1.36131	0.0580206	0.695088		0.0580206	0.0403294	0.695088
47	14.0207	0.764745	0.532171	0.054544	0.69588		0.054544	0.0379561	0.69588		19.8681	1.10759	0.769669	0.0557468	0.694907		0.0557468	0.0387389	0.694907		32.3109	1.83987	1.27837	0.0569429	0.694811		0.0569429	0.0395646	0.694811
48	14.9642	0.852708	0.593149	0.0569834	0.695607		0.0569834	0.039638	0.695607		22.0689	1.28003	0.8897	0.0580013	0.695064		0.0580013	0.0403146	0.695064		35.6383	1.99376	1.38554	0.0559443	0.69494		0.0559443	0.0388779	0.69494
49	15.5691	0.870964	0.605771	0.055942	0.695518		0.055942	0.0389086	0.695518		23.9777	1.41662	0.984384	0.0590806	0.694884		0.0590806	0.0410542	0.694884		37.0519	2.05186	1.42601	0.0553779	0.694987		0.0553779	0.038487	0.694987
50	13.256	0.727269	0.506252	0.0548632	0.696101		0.0548632	0.0381903	0.696101		25.6797	1.4263	0.99113	0.055542	0.694895		0.055542	0.0385958	0.694895		34.941	1.95081	1.35504	0.0558316	0.694602		0.0558316	0.0387808	0.694602
51	12.3347	0.670803	0.467021	0.0543836	0.696212		0.0543836	0.0378625	0.696212		24.9305	1.38972	0.966455	0.0557438	0.695432		0.0557438	0.038766	0.695432		38.9099	2.22464	1.54532	0.0571742	0.694637		0.0571742	0.0397153	0.694637
52	12.9416	0.740391	0.516341	0.0572102	0.697389		0.0572102	0.0398978	0.697389		23.9692	1.42277	0.988579	0.0593581	0.694829		0.0593581	0.0412437	0.694829		30.4951	1.72322	1.19741	0.0565079	0.694866		0.0565079	0.0392654	0.694866
53	12.1498	0.701819	0.488642	0.0577641	0.69625		0.0577641	0.0402183	0.69625		20.6586	1.18542	0.82386	0.0573817	0.694993		0.0573817	0.0398799	0.694993		28.7004	1.60746	1.11674	0.0560082	0.694726		0.0560082	0.0389104	0.694726
54	12.1913	0.665252	0.463191	0.0545677	0.696264		0.0545677	0.0379935	0.696264		23.2812	1.36279	0.947101	0.058536	0.694973		0.058536	0.0406809	0.694973		33.1241	1.86705	1.29766	0.0563652	0.695034		0.0563652	0.0391758	0.695034
55	12.063	0.71134	0.497995	0.0589689	0.70008		0.0589689	0.041283	0.70008		29.5408	1.65406	1.14943	0.0559924	0.694912		0.0559924	0.0389097	0.694912		30.8833	1.7315	1.20309	0.056066	0.694823		0.056066	0.038956	0.694823
56	10.909	0.65292	0.454245	0.0598517	0.695713		0.0598517	0.0416396	0.695713		23.3721	1.3313	0.925064	0.0569612	0.694858		0.0569612	0.0395799	0.694858		31.6629	1.76874	1.22948	0.0558618	0.695116		0.0558618	0.0388304	0.695116
57	14.0597	0.760267	0.529092	0.0540743	0.695929		0.0540743	0.0376319	0.695929		20.2301	1.12927	0.785018	0.0558215	0.695152		0.0558215	0.0388044	0.695152		33.2321	1.88788	1.3115	0.056809	0.694696		0.056809	0.039465	0.694696
58	14.3038	0.780126	0.542934	0.0545399	0.695957		0.0545399	0.0379574	0.695957		23.4938	1.32106	0.918512	0.0562302	0.695285		0.0562302	0.039096	0.695285		30.4503	1.69634	1.17915	0.0557085	0.695114		0.0557085	0.0387237	0.695114
59	12.9569	0.723402	0.503445	0.0558314	0.695941		0.0558314	0.0388554	0.695941		26.5681	1.49608	1.03967	0.0563109	0.694928		0.0563109	0.039132	0.694928		33.9323	1.93822	1.34649	0.0571203	0.694703		0.0571203	0.0396816	0.694703
60	14.3722	0.790491	0.549999	0.0550015	0.69577		0.0550015	0.0382684	0.69577		24.4982	1.54118	1.07064	0.0629099	0.69469		0.0629099	0.0437028	0.69469		27.9683	1.55767	1.08252	0.0556941	0.694961		0.0556941	0.0387053	0.694961
***	L4	C	H4	C | L4	H4 | C						L4	C	H4	C | L4	H4 | C						L4	C	H4	C | L4	H4 | C
***	tbdgy	tbdgy	tbdgy	tbdgy - St	tbdgy - St						tbdgy	tbdgy	tbdgy	tbdgy - St	tbdgy - St						tbdgy	tbdgy	tbdgy	tbdgy - St	tbdgy - St
***	14.8084	0.869563	0.605173	0.0552867	0.705565	av	0.0554861	0.0386168	0.695968		23.8028	1.44155	1.00221	0.0565058	0.700165	av	0.0562824	0.0391271	0.695192		30.5457	1.79486	1.24743	0.0570466	0.699582	av	0.0566436	0.039364	0.694943
***	2.37763	4.56887	4.56208	0.33421	0.954987	stabw	0.0014137	0.00099728	0.000663977		3.08976	5.00518	5.00247	0.619122	0.663712	stabw	0.00160761	0.00111868	0.000329961		4.7564	4.18883	4.18698	0.839156	0.630162	stabw	0.0010823	0.000747265	0.000229889
***	0.336247	0.0397293	0.0276085	0.000184774	0.00673805	stabw/(n)^0.5	0.000199928	0.000141037	9.39005e-05		0.436958	0.0721521	0.0501352	0.00034984	0.00464708	stabw/(n)^0.5	0.000227351	0.000158205	4.66635e-05		0.672657	0.0751835	0.0522296	0.00047871	0.0044085	stabw/(n)^0.5	0.000153061	0.000105679	3.25113e-05
***	0.0227064	35.3903	35.3377	2.58878	7.3973	(stabw/(n)^0.5)/av /%	0.00360321	0.00365221	0.000134921		0.0183574	38.77	38.749	4.7957	5.14109	(stabw/(n)^0.5)/av /%	0.00403946	0.00404336	6.71232e-05		0.0220213	32.4465	32.4322	6.50007	4.88122	(stabw/(n)^0.5)/av /%	0.00270217	0.00268467	4.67826e-05
***	5.72177	0.307741	0.213854	0.00143125	0.0521927						8.72752	0.558888	0.388346	0.00270985	0.0359961						8.58596	0.582369	0.404569	0.00370807	0.0341481
	WASO04 Laserablation (long sample tube "SQUID"))
	1st run						not blank corr				2nd run						not blank corr				3rd run						not blank corr
Cycle	27.94	28.925	29.916	28.925/27.94 (1)	29.916/28.925 (2)		29/28	30/28	30/29		27.94	28.925	29.916	28.925/27.94 (1)	29.916/28.925 (2)		29/28	30/28	30/29		27.94	28.925	29.916	28.925/27.94 (1)	29.916/28.925 (2)		29/28	30/28	30/29
11	32.5962	1.74188	1.21134	0.0534383	0.695417		0.0534383	0.0371619	0.695417		27.7491	1.48701	1.03407	0.0535875	0.695405		0.0535875	0.037265	0.695405		29.2936	1.56941	1.09149	0.0535752	0.695474		0.0535752	0.0372602	0.695474
12	32.3456	1.75627	1.22151	0.0542969	0.695514		0.0542969	0.0377643	0.695514		25.7133	1.39411	0.970103	0.0542175	0.695859		0.0542175	0.0377277	0.695859		28.0565	1.54945	1.07725	0.0552261	0.695245		0.0552261	0.0383957	0.695245
13	30.6812	1.66074	1.15536	0.0541288	0.69569		0.0541288	0.0376569	0.69569		25.7597	1.37624	0.957346	0.0534262	0.695624		0.0534262	0.0371645	0.695624		28.2899	1.53219	1.06577	0.0541606	0.695581		0.0541606	0.037673	0.695581
14	29.1286	1.58441	1.10231	0.0543937	0.69572		0.0543937	0.0378428	0.69572		26.2645	1.40084	0.974635	0.0533358	0.695749		0.0533358	0.0371084	0.695749		29.2038	1.57415	1.09469	0.0539022	0.695416		0.0539022	0.0374845	0.695416
15	29.1126	1.63371	1.13861	0.0561168	0.696948		0.0561168	0.0391105	0.696948		25.2894	1.43187	1.00782	0.0566195	0.703847		0.0566195	0.0398515	0.703847		30.6411	1.6409	1.14109	0.0535524	0.695405		0.0535524	0.0372406	0.695405
16	28.3741	1.51838	1.05619	0.053513	0.695602		0.053513	0.0372237	0.695602		23.6446	1.28013	0.890655	0.0541404	0.695755		0.0541404	0.0376684	0.695755		30.1792	1.62874	1.13279	0.0539689	0.695502		0.0539689	0.0375355	0.695502
17	29.3166	1.59156	1.10695	0.0542888	0.695513		0.0542888	0.0377586	0.695513		25.4004	1.36611	0.950391	0.0537831	0.695692		0.0537831	0.0374165	0.695692		26.9332	1.44085	1.00225	0.0534973	0.695595		0.0534973	0.0372124	0.695595
18	31.1221	1.80696	1.25607	0.0580603	0.695128		0.0580603	0.0403593	0.695128		25.3584	1.35682	0.943543	0.0535059	0.695405		0.0535059	0.0372083	0.695405		26.4004	1.40764	0.97906	0.053319	0.695532		0.053319	0.0370851	0.695532
19	32.5363	1.81877	1.26502	0.0558999	0.695537		0.0558999	0.0388804	0.695537		25.0074	1.3371	0.930179	0.053468	0.695672		0.053468	0.0371962	0.695672		29.0631	1.60686	1.11757	0.0552886	0.695503		0.0552886	0.0384534	0.695503
20	31.3756	1.68939	1.17484	0.053844	0.695421		0.053844	0.0374442	0.695421		25.9891	1.38532	0.963671	0.0533039	0.69563		0.0533039	0.0370798	0.69563		32.219	1.75399	1.21947	0.0544396	0.695254		0.0544396	0.0378494	0.695254
21	32.6417	1.77173	1.23177	0.0542781	0.695236		0.0542781	0.0377361	0.695236		29.2092	1.62605	1.13036	0.055669	0.695155		0.055669	0.0386986	0.695155		30.1823	1.6289	1.13218	0.0539686	0.695059		0.0539686	0.0375114	0.695059
22	33.8963	1.95431	1.35945	0.0576556	0.695613		0.0576556	0.040106	0.695613		27.7037	1.49765	1.04158	0.0540596	0.695479		0.0540596	0.0375973	0.695479		27.5719	1.62863	1.13897	0.0590685	0.699343		0.0590685	0.0413091	0.699343
23	35.0704	1.98391	1.37895	0.0565692	0.695068		0.0565692	0.0393194	0.695068		29.2011	1.73634	1.22144	0.0594615	0.703454		0.0594615	0.0418284	0.703454		25.4374	1.41206	0.981398	0.0555112	0.695011		0.0555112	0.0385809	0.695011
24	31.8818	1.76069	1.22426	0.0552257	0.69533		0.0552257	0.0384001	0.69533		32.1779	1.73965	1.20988	0.0540635	0.695472		0.0540635	0.0375996	0.695472		27.5662	1.47691	1.02731	0.0535767	0.695582		0.0535767	0.037267	0.695582
25	31.6419	1.74348	1.21227	0.0551003	0.695316		0.0551003	0.0383122	0.695316		31.4475	1.73525	1.20653	0.0551793	0.695308		0.0551793	0.0383666	0.695308		31.7149	1.73208	1.20467	0.054614	0.695505		0.054614	0.0379843	0.695505
26	31.2512	1.74636	1.21417	0.0558814	0.69526		0.0558814	0.0388521	0.69526		33.2693	1.86952	1.30109	0.0561936	0.695946		0.0561936	0.0391077	0.695946		31.1403	1.6813	1.16901	0.053991	0.695306		0.053991	0.0375403	0.695306
27	35.917	1.92365	1.33754	0.0535581	0.695313		0.0535581	0.0372397	0.695313		30.3963	1.62973	1.13317	0.0536161	0.695315		0.0536161	0.03728	0.695315		29.0063	1.56815	1.09023	0.0540626	0.695233		0.0540626	0.0375861	0.695233
28	33.2279	1.87192	1.30133	0.0563357	0.695183		0.0563357	0.0391636	0.695183		30.5412	1.65567	1.15127	0.054211	0.695351		0.054211	0.0376957	0.695351		28.6843	1.54233	1.0727	0.0537693	0.695504		0.0537693	0.0373968	0.695504
29	31.5784	1.70635	1.18647	0.0540353	0.695326		0.0540353	0.0375722	0.695326		29.7754	1.59902	1.11216	0.0537029	0.695526		0.0537029	0.0373517	0.695526		27.5004	1.46844	1.02106	0.0533971	0.695337		0.0533971	0.037129	0.695337
30	32.9847	1.79408	1.24762	0.0543913	0.695411		0.0543913	0.0378243	0.695411		29.6429	1.64939	1.1464	0.0556421	0.695043		0.0556421	0.0386736	0.695043		25.5019	1.36527	0.949554	0.053536	0.695507		0.053536	0.0372347	0.695507
31	35.4142	1.91124	1.32896	0.0539681	0.695339		0.0539681	0.0375261	0.695339		29.2255	1.62492	1.131	0.0555995	0.696035		0.0555995	0.0386992	0.696035		25.2453	1.36265	0.947823	0.0539767	0.695571		0.0539767	0.0375446	0.695571
32	35.0738	1.93883	1.34779	0.0552785	0.695158		0.0552785	0.0384273	0.695158		29.5511	1.6811	1.16863	0.056888	0.695157		0.056888	0.0395461	0.695157		24.8184	1.33283	0.926857	0.0537034	0.695404		0.0537034	0.0373456	0.695404
33	35.3581	1.91915	1.33423	0.0542774	0.695219		0.0542774	0.0377347	0.695219		30.2896	1.62499	1.1302	0.0536483	0.695512		0.0536483	0.0373131	0.695512		26.0086	1.42578	0.991859	0.0548194	0.695662		0.0548194	0.0381358	0.695662
34	32.9261	1.77376	1.23308	0.0538708	0.695181		0.0538708	0.03745	0.695181		29.3201	1.58168	1.09994	0.0539452	0.695425		0.0539452	0.0375149	0.695425		26.2937	1.541	1.07659	0.0586071	0.698631		0.0586071	0.0409448	0.698631
35	35.4653	1.90188	1.32243	0.0536265	0.695329		0.0536265	0.0372881	0.695329		30.6559	1.6348	1.13675	0.0533274	0.695346		0.0533274	0.037081	0.695346		28.2036	1.58525	1.10213	0.0562075	0.695237		0.0562075	0.0390775	0.695237
36	36.5974	1.98497	1.37999	0.0542378	0.695221		0.0542378	0.0377073	0.695221		28.8038	1.57338	1.09407	0.0546241	0.695364		0.0546241	0.0379837	0.695364		25.552	1.37637	0.95702	0.0538656	0.695321		0.0538656	0.0374539	0.695321
37	37.8656	2.01922	1.40434	0.0533261	0.695486		0.0533261	0.0370875	0.695486		29.562	1.72467	1.19846	0.0583408	0.694894		0.0583408	0.0405407	0.694894		26.6945	1.55514	1.08966	0.0582567	0.700682		0.0582567	0.0408194	0.700682
38	37.4027	2.10154	1.46075	0.0561868	0.695084		0.0561868	0.0390545	0.695084		28.8208	1.53823	1.06951	0.0533724	0.695286		0.0533724	0.037109	0.695286		25.7371	1.38472	0.962876	0.0538023	0.69536		0.0538023	0.037412	0.69536
39	34.8686	1.8789	1.30645	0.0538851	0.695328		0.0538851	0.0374678	0.695328		32.5466	1.74791	1.21566	0.0537048	0.695497		0.0537048	0.0373515	0.695497		24.624	1.31162	0.912257	0.0532661	0.695517		0.0532661	0.0370475	0.695517
40	32.6612	1.74239	1.21168	0.0533474	0.695415		0.0533474	0.0370986	0.695415		31.9113	1.86599	1.2966	0.0584742	0.694857		0.0584742	0.0406312	0.694857		26.7106	1.47813	1.02771	0.0553386	0.69528		0.0553386	0.0384758	0.69528
41	32.3032	1.72382	1.19878	0.0533638	0.695417		0.0533638	0.0371101	0.695417		31.4197	1.69302	1.17737	0.0538839	0.695428		0.0538839	0.0374724	0.695428		26.0645	1.49289	1.03761	0.0572768	0.695034		0.0572768	0.0398093	0.695034
42	31.031	1.67941	1.16772	0.0541204	0.695315		0.0541204	0.0376307	0.695315		28.9636	1.54385	1.07367	0.0533032	0.695448		0.0533032	0.0370696	0.695448		24.7679	1.32929	0.925449	0.0536698	0.696197		0.0536698	0.0373648	0.696197
43	34.4554	1.84579	1.28352	0.0535706	0.695378		0.0535706	0.0372518	0.695378		27.9545	1.5673	1.09456	0.0560662	0.698371		0.0560662	0.039155	0.698371		26.7836	1.45536	1.01186	0.0543375	0.695266		0.0543375	0.037779	0.695266
44	33.6326	2.10427	1.46205	0.0625663	0.694805		0.0625663	0.0434714	0.694805		28.8089	1.54349	1.07337	0.053577	0.695417		0.053577	0.0372584	0.695417		26.2337	1.42722	0.992649	0.0544038	0.695514		0.0544038	0.0378386	0.695514
45	33.1643	1.85455	1.2889	0.0559201	0.694993		0.0559201	0.0388641	0.694993		26.2478	1.41637	0.985047	0.0539613	0.695476		0.0539613	0.0375287	0.695476		27.1376	1.48058	1.02968	0.0545584	0.695457		0.0545584	0.037943	0.695457
46	30.8628	1.71193	1.19	0.055469	0.695122		0.055469	0.0385577	0.695122		28.6877	1.69433	1.17763	0.0590613	0.695038		0.0590613	0.0410499	0.695038		26.2731	1.40698	0.978443	0.0535522	0.695419		0.0535522	0.0372413	0.695419
47	31.7615	1.70153	1.18295	0.053572	0.695227		0.053572	0.0372447	0.695227		25.5953	1.428	0.992875	0.0557916	0.695289		0.0557916	0.0387912	0.695289		24.5847	1.31159	0.912301	0.05335	0.695567		0.05335	0.0371085	0.695567
48	30.902	1.67987	1.16833	0.0543613	0.695486		0.0543613	0.0378075	0.695486		29.9821	1.65649	1.15601	0.0552492	0.697871		0.0552492	0.0385568	0.697871		26.3628	1.4864	1.03816	0.0563825	0.69844		0.0563825	0.0393798	0.69844
49	31.9117	1.70187	1.18349	0.0533305	0.695407		0.0533305	0.0370864	0.695407		24.5431	1.37957	0.961818	0.0562101	0.697188		0.0562101	0.039189	0.697188		25.7133	1.4707	1.02209	0.0571959	0.694969		0.0571959	0.0397494	0.694969
50	31.1411	1.73278	1.20465	0.0556428	0.695213		0.0556428	0.0386836	0.695213		29.5963	1.59005	1.10567	0.0537246	0.695369		0.0537246	0.0373584	0.695369		21.4035	1.14253	0.794741	0.0533807	0.695597		0.0533807	0.0371314	0.695597
51	30.583	1.63036	1.13377	0.0533093	0.69541		0.0533093	0.0370718	0.69541		28.9209	1.70075	1.1925	0.0588071	0.701162		0.0588071	0.0412333	0.701162		22.3377	1.23185	0.856693	0.0551466	0.695452		0.0551466	0.0383518	0.695452
52	27.2507	1.5372	1.06852	0.0564094	0.695107		0.0564094	0.0392106	0.695107		29.8355	1.67179	1.16248	0.0560336	0.695348		0.0560336	0.0389629	0.695348		22.6812	1.26908	0.882635	0.0559531	0.695491		0.0559531	0.0389149	0.695491
53	29.7415	1.58909	1.10536	0.0534301	0.695594		0.0534301	0.0371656	0.695594		26.5567	1.44631	1.00576	0.0544612	0.695394		0.0544612	0.037872	0.695394		22.9754	1.2261	0.852912	0.0533656	0.695632		0.0533656	0.0371228	0.695632
54	29.1733	1.56332	1.08689	0.0535874	0.695246		0.0535874	0.0372564	0.695246		24.5553	1.40026	0.973256	0.0570247	0.695054		0.0570247	0.0396352	0.695054		22.4741	1.32285	0.930517	0.0588612	0.703418		0.0588612	0.041404	0.703418
55	28.7034	1.60659	1.11662	0.055972	0.695026		0.055972	0.038902	0.695026		25.1761	1.40379	0.976178	0.055759	0.695385		0.055759	0.038774	0.695385		23.7437	1.28164	0.891594	0.0539782	0.695665		0.0539782	0.0375507	0.695665
56	27.791	1.58435	1.10141	0.0570095	0.695178		0.0570095	0.0396317	0.695178		25.1809	1.46968	1.02179	0.0583647	0.695245		0.0583647	0.0405778	0.695245		22.8544	1.30993	0.911056	0.0573163	0.695499		0.0573163	0.0398634	0.695499
57	27.0243	1.441	1.00225	0.0533224	0.695523		0.0533224	0.0370869	0.695523		25.3826	1.39839	0.972362	0.0550926	0.695343		0.0550926	0.0383083	0.695343		25.1349	1.35584	0.942572	0.0539426	0.695192		0.0539426	0.0375005	0.695192
58	27.9426	1.49336	1.03863	0.053444	0.695497		0.053444	0.0371702	0.695497		26.4383	1.43701	0.999033	0.0543535	0.695215		0.0543535	0.0377873	0.695215		25.9958	1.42316	0.989463	0.0547459	0.695256		0.0547459	0.0380624	0.695256
59	27.0455	1.51061	1.0501	0.0558544	0.69515		0.0558544	0.0388272	0.69515		27.6129	1.49855	1.04203	0.05427	0.695359		0.05427	0.0377371	0.695359		25.2878	1.36195	0.947071	0.0538578	0.695381		0.0538578	0.0374517	0.695381
60	28.5969	1.63178	1.13463	0.0570613	0.695331		0.0570613	0.0396765	0.695331		27.2658	1.53083	1.06437	0.0561447	0.695291		0.0561447	0.0390369	0.695291		25.8696	1.38435	0.962662	0.0535128	0.695387		0.0535128	0.0372121	0.695387
***	L4	C	H4	C | L4	H4 | C						L4	C	H4	C | L4	H4 | C						L4	C	H4	C | L4	H4 | C
***	tbdgy	tbdgy	tbdgy	tbdgy - St	tbdgy - St						tbdgy	tbdgy	tbdgy	tbdgy - St	tbdgy - St						tbdgy	tbdgy	tbdgy	tbdgy - St	tbdgy - St
***	31.9066	1.5702	1.092	0.0546123	0.715048	av	0.0548866	0.0381655	0.695355		28.179	1.37343	0.956035	0.0552573	0.710934	av	0.055085	0.0383402	0.695995		26.5831	1.29452	0.900944	0.0547142	0.710757	av	0.0547411	0.0380953	0.695888
***	2.74384	4.59563	4.59021	0.396417	1.16644	stabw	0.00170523	0.00118083	0.000296651		2.41465	4.68658	4.68207	0.847537	0.953993	stabw	0.0017386	0.0012582	0.00187634		2.48041	4.72246	4.71706	0.42347	0.915986	stabw	0.00158352	0.00116479	0.00154844
***	0.388038	0.0721606	0.0501252	0.000216492	0.00834058	stabw/(n)^0.5	0.000241156	0.000166995	4.19528e-05		0.341483	0.0643669	0.0447622	0.000468326	0.00678227	stabw/(n)^0.5	0.000245875	0.000177937	0.000265354		0.350782	0.0611331	0.0424981	0.000231698	0.00651044	stabw/(n)^0.5	0.000223944	0.000164726	0.000218982
***	0.0121617	35.5976	35.5556	3.07063	9.03518	(stabw/(n)^0.5)/av /%	0.0043937	0.00437554	6.03329e-05		0.0121183	36.3021	36.2672	6.565	7.3896	(stabw/(n)^0.5)/av /%	0.00446356	0.00464099	0.000381258		0.0131957	36.58	36.5382	3.28019	7.0952	(stabw/(n)^0.5)/av /%	0.00409096	0.00432406	0.000314681
***	10.1722	0.558953	0.388268	0.00167694	0.0646059						9.01561	0.498584	0.346727	0.00362764	0.0525352						8.65443	0.473535	0.329189	0.00179473	0.0504296

## Sheet: scan speed all data
	Laserablation - scan speed characterization
	solid samples		WASO04
	dissolved sample		WASO04 4 µg/g
	Neptune XT
	ESI NWR213
	WASO04 Laserablation scan speed 2 µm/s
	1st run						not blank corr				2nd run						not blank corr				3rd run						not blank corr
Cycle	27.94	28.925	29.916	28.925/27.94 (1)	29.916/28.925 (2)		29/28	30/28	30/29		27.94	28.925	29.916	28.925/27.94 (1)	29.916/28.925 (2)		29/28	30/28	30/29		27.94	28.925	29.916	28.925/27.94 (1)	29.916/28.925 (2)		29/28	30/28	30/29
1	0.0790716	0.00419818	0.00407254	0.0530934	0.970073		0.0530934	0.0515044	0.970073		0.0804666	0.00424196	0.00411491	0.052717	0.970051		0.052717	0.0511382	0.970051		0.081281	0.00431332	0.00416478	0.0530667	0.965562		0.0530667	0.0512392	0.965562
2	0.0784602	0.00414908	0.00411458	0.0528813	0.991686		0.0528813	0.0524416	0.991686		0.0800591	0.00424639	0.00411693	0.0530407	0.969514		0.0530407	0.0514237	0.969514		0.0806343	0.00426073	0.00413449	0.0528402	0.97037		0.0528402	0.0512746	0.97037
3	0.0781507	0.00411519	0.00399024	0.0526571	0.969639		0.0526571	0.0510584	0.969639		0.078826	0.00416165	0.00405476	0.0527954	0.974315		0.0527954	0.0514394	0.974315		0.0815862	0.00435716	0.0042263	0.0534055	0.969968		0.0534055	0.0518016	0.969968
4	0.0774971	0.00414075	0.00404362	0.0534311	0.976543		0.0534311	0.0521778	0.976543		0.0806321	0.00424759	0.00408012	0.0526786	0.960573		0.0526786	0.0506017	0.960573		0.0817828	0.0043214	0.00410486	0.05284	0.949891		0.05284	0.0501922	0.949891
5	0.0779163	0.00411782	0.00409261	0.0528492	0.993878		0.0528492	0.0525257	0.993878		0.0789271	0.00416387	0.00409211	0.0527559	0.982767		0.0527559	0.0518467	0.982767		0.080234	0.00424678	0.00406745	0.0529299	0.957772		0.0529299	0.0506948	0.957772
6	4.35029	0.233165	0.163398	0.0535976	0.700784		0.0535976	0.0375604	0.700784		1.86042	0.0987663	0.0699204	0.0530881	0.707938		0.0530881	0.0375831	0.707938		4.58261	0.243208	0.170415	0.0530718	0.700697		0.0530718	0.0371873	0.700697
7	21.7006	1.1675	0.812815	0.0538005	0.6962		0.0538005	0.0374559	0.6962		11.933	0.637562	0.444374	0.0534287	0.69699		0.0534287	0.0372392	0.69699		18.5952	0.990861	0.689776	0.0532858	0.696138		0.0532858	0.0370943	0.696138
8	29.8011	1.58713	1.10368	0.0532573	0.695393		0.0532573	0.0370347	0.695393		19.3372	1.02976	0.716792	0.0532531	0.696075		0.0532531	0.0370681	0.696075		22.6833	1.20961	0.841548	0.0533261	0.695717		0.0533261	0.0370999	0.695717
9	29.0178	1.60686	1.11677	0.0553749	0.695004		0.0553749	0.0384858	0.695004		18.1823	0.968543	0.673947	0.0532686	0.695836		0.0532686	0.0370662	0.695836		20.3067	1.08246	0.752968	0.0533054	0.695609		0.0533054	0.0370798	0.695609
10	22.0755	1.17754	0.818966	0.0533418	0.695486		0.0533418	0.0370985	0.695486		14.6996	0.785948	0.546758	0.0534672	0.695667		0.0534672	0.0371953	0.695667		15.1803	0.813415	0.565993	0.0535835	0.695823		0.0535835	0.0372846	0.695823
11	18.3102	1.03087	0.717455	0.0563002	0.695971		0.0563002	0.0391833	0.695971		11.9677	0.644601	0.448807	0.0538617	0.696256		0.0538617	0.0375015	0.696256		12.2936	0.654711	0.455858	0.0532564	0.696274		0.0532564	0.0370811	0.696274
12	16.7897	0.935737	0.650602	0.0557328	0.695283		0.0557328	0.0387501	0.695283		10.4112	0.55444	0.38632	0.0532544	0.696774		0.0532544	0.0371063	0.696774		11.317	0.602884	0.420068	0.0532724	0.696764		0.0532724	0.0371183	0.696764
13	16.1722	0.866459	0.603025	0.0535771	0.695965		0.0535771	0.0372878	0.695965		12.6018	0.696266	0.48468	0.0552513	0.696114		0.0552513	0.0384612	0.696114		11.4844	0.61419	0.427748	0.0534804	0.696442		0.0534804	0.037246	0.696442
14	16.6324	0.918839	0.639482	0.0552439	0.695968		0.0552439	0.038448	0.695968		12.3364	0.745889	0.519021	0.0604626	0.695843		0.0604626	0.0420724	0.695843		11.6147	0.639379	0.445412	0.055049	0.696632		0.055049	0.0383489	0.696632
15	15.6807	0.835374	0.581502	0.0532742	0.696098		0.0532742	0.0370841	0.696098		12.551	0.796339	0.577869	0.0634481	0.725658		0.0634481	0.0460416	0.725658		12.086	0.659992	0.459346	0.0546081	0.695988		0.0546081	0.0380066	0.695988
16	15.4832	0.826776	0.575483	0.0533981	0.696057		0.0533981	0.0371681	0.696057		11.1651	0.594529	0.414248	0.0532486	0.696767		0.0532486	0.0371019	0.696767		11.4054	0.648703	0.451722	0.0568771	0.696346		0.0568771	0.0396061	0.696346
17	14.8495	0.800311	0.557143	0.053895	0.696158		0.053895	0.0375194	0.696158		12.312	0.658856	0.45868	0.0535134	0.696176		0.0535134	0.0372547	0.696176		10.8465	0.595847	0.414722	0.0549342	0.696021		0.0549342	0.0382354	0.696021
18	13.4691	0.717944	0.499766	0.0533029	0.696108		0.0533029	0.0371045	0.696108		11.6821	0.622225	0.433524	0.0532632	0.696732		0.0532632	0.0371102	0.696732		9.93698	0.529487	0.368988	0.0532845	0.696878		0.0532845	0.0371328	0.696878
19	13.2052	0.703196	0.489599	0.0532515	0.696249		0.0532515	0.0370763	0.696249		11.9596	0.637251	0.443863	0.0532838	0.696527		0.0532838	0.0371136	0.696527		10.7285	0.669079	0.465792	0.0623644	0.696169		0.0623644	0.0434162	0.696169
20	13.1107	0.698221	0.486168	0.0532558	0.696295		0.0532558	0.0370818	0.696295		11.6471	0.625566	0.435672	0.0537101	0.696443		0.0537101	0.037406	0.696443		9.69649	0.538606	0.374867	0.0555465	0.695995		0.0555465	0.0386601	0.695995
21	13.4965	0.718548	0.500408	0.0532396	0.696416		0.0532396	0.0370769	0.696416		11.0478	0.609261	0.424432	0.0551477	0.696634		0.0551477	0.0384178	0.696634		9.69334	0.516368	0.35991	0.0532704	0.697002		0.0532704	0.0371296	0.697002
22	12.7767	0.68031	0.473677	0.0532461	0.696266		0.0532461	0.0370734	0.696266		10.8932	0.587981	0.409436	0.0539769	0.696342		0.0539769	0.0375864	0.696342		9.84769	0.524694	0.365597	0.0532809	0.696781		0.0532809	0.0371252	0.696781
23	12.5186	0.668004	0.465158	0.0533611	0.69634		0.0533611	0.0371575	0.69634		10.1113	0.545011	0.379817	0.0539013	0.696897		0.0539013	0.0375636	0.696897		9.62852	0.512839	0.357306	0.0532625	0.696721		0.0532625	0.0371091	0.696721
24	13.6409	0.728615	0.507331	0.0534139	0.696294		0.0534139	0.0371918	0.696294		10.9295	0.586607	0.408473	0.0536719	0.696331		0.0536719	0.0373734	0.696331		25.6175	2.03023	1.41403	0.0792517	0.696486		0.0792517	0.0551977	0.696486
25	15.3853	0.819174	0.570182	0.053244	0.696045		0.053244	0.0370603	0.696045		10.4147	0.554545	0.386497	0.0532463	0.696962		0.0532463	0.0371107	0.696962		12.4759	0.71281	0.495984	0.0571348	0.695815		0.0571348	0.0397553	0.695815
26	14.043	0.750756	0.522805	0.0534613	0.696371		0.0534613	0.0372289	0.696371		10.028	0.534844	0.372706	0.0533348	0.69685		0.0533348	0.0371664	0.69685		11.05	0.589868	0.410837	0.0533815	0.69649		0.0533815	0.0371797	0.69649
27	13.3517	0.71177	0.495566	0.0533094	0.696246		0.0533094	0.0371164	0.696246		9.60819	0.511721	0.356442	0.0532589	0.696555		0.0532589	0.0370978	0.696555		10.6331	0.616471	0.429058	0.0579766	0.695991		0.0579766	0.0403512	0.695991
28	15.0126	0.801875	0.558131	0.0534136	0.696033		0.0534136	0.0371776	0.696033		9.89989	0.532561	0.371087	0.0537947	0.696797		0.0537947	0.037484	0.696797		10.4825	0.558558	0.388969	0.0532848	0.69638		0.0532848	0.0371064	0.69638
29	13.6308	0.726304	0.505535	0.0532839	0.696037		0.0532839	0.0370876	0.696037		10.3982	0.561313	0.390973	0.0539817	0.696533		0.0539817	0.0376	0.696533		9.89496	0.527671	0.367577	0.0533272	0.696602		0.0533272	0.0371479	0.696602
30	13.4822	0.719266	0.500919	0.0533492	0.696431		0.0533492	0.037154	0.696431		9.60539	0.512476	0.35699	0.053353	0.696598		0.053353	0.0371656	0.696598		9.96979	0.531115	0.370083	0.0532724	0.696804		0.0532724	0.0371204	0.696804
31	13.7875	0.734254	0.511321	0.053255	0.696382		0.053255	0.0370858	0.696382		9.33944	0.497479	0.346623	0.0532665	0.696759		0.0532665	0.0371139	0.696759		10.5187	0.580346	0.404116	0.0551727	0.696337		0.0551727	0.0384188	0.696337
32	15.1197	0.805035	0.560267	0.0532442	0.695954		0.0532442	0.0370555	0.695954		10.4578	0.564977	0.39358	0.0540247	0.69663		0.0540247	0.0376352	0.69663		10.4711	0.578601	0.402929	0.055257	0.696385		0.055257	0.0384801	0.696385
33	13.2737	0.764851	0.532158	0.0576215	0.695767		0.0576215	0.0400911	0.695767		10.1823	0.544174	0.379075	0.0534433	0.696606		0.0534433	0.0372289	0.696606		9.96792	0.531187	0.370127	0.0532896	0.696793		0.0532896	0.0371319	0.696793
34	14.0143	0.747359	0.520366	0.0533285	0.696273		0.0533285	0.0371312	0.696273		16.3564	1.17567	0.816961	0.071878	0.694891		0.071878	0.0499474	0.694891		10.8291	0.576995	0.401914	0.053282	0.696565		0.053282	0.0371143	0.696565
35	13.8869	0.739994	0.515085	0.0532873	0.696067		0.0532873	0.0370915	0.696067		10.0495	0.535566	0.373046	0.053293	0.696545		0.053293	0.037121	0.696545		10.3867	0.606574	0.42216	0.0583991	0.695975		0.0583991	0.0406444	0.695975
36	12.9015	0.687133	0.478509	0.05326	0.696385		0.05326	0.0370895	0.696385		8.95992	0.477423	0.332687	0.0532843	0.696839		0.0532843	0.0371305	0.696839		9.64954	0.514381	0.358384	0.0533063	0.696729		0.0533063	0.03714	0.696729
37	11.7939	0.628204	0.43743	0.0532654	0.696317		0.0532654	0.0370896	0.696317		9.94834	0.536973	0.374041	0.0539762	0.696573		0.0539762	0.0375984	0.696573		9.69479	0.516275	0.359746	0.0532529	0.696811		0.0532529	0.0371072	0.696811
38	11.5596	0.692108	0.481466	0.059873	0.695652		0.059873	0.0416508	0.695652		9.41957	0.521131	0.362878	0.0553243	0.696329		0.0553243	0.0385239	0.696329		9.39777	0.502056	0.349807	0.0534229	0.696748		0.0534229	0.0372223	0.696748
39	13.6304	0.841446	0.585021	0.0617329	0.695257		0.0617329	0.0429202	0.695257		10.3777	0.650476	0.452386	0.0626804	0.695469		0.0626804	0.0435923	0.695469		8.88957	0.473588	0.330123	0.0532746	0.697068		0.0532746	0.037136	0.697068
40	13.0788	0.735656	0.512165	0.0562482	0.696202		0.0562482	0.0391601	0.696202		11.0075	0.719562	0.500059	0.0653703	0.694949		0.0653703	0.045429	0.694949		9.90935	0.52894	0.368435	0.0533779	0.696554		0.0533779	0.0371806	0.696554
41	13.4035	0.739642	0.514452	0.0551828	0.695542		0.0551828	0.038382	0.695542		9.69179	0.516129	0.359524	0.0532542	0.696579		0.0532542	0.0370958	0.696579		9.56159	0.650069	0.452787	0.0679875	0.696521		0.0679875	0.0473547	0.696521
42	11.5014	0.612762	0.426829	0.0532773	0.696566		0.0532773	0.0371112	0.696566		9.81962	0.638648	0.445755	0.065038	0.697966		0.065038	0.0453943	0.697966		9.16613	0.488666	0.340647	0.0533121	0.697096		0.0533121	0.0371637	0.697096
43	11.0615	0.628757	0.437703	0.0568419	0.696141		0.0568419	0.03957	0.696141		9.08605	0.508551	0.3541	0.0559706	0.696292		0.0559706	0.0389718	0.696292		9.19186	0.48952	0.341249	0.0532558	0.69711		0.0532558	0.0371252	0.69711
44	11.1241	0.592882	0.412893	0.0532972	0.696417		0.0532972	0.0371171	0.696417		9.34822	0.533303	0.371273	0.0570486	0.696177		0.0570486	0.0397159	0.696177		10.6601	0.644025	0.448343	0.0604147	0.696159		0.0604147	0.0420582	0.696159
45	10.8844	0.579806	0.403807	0.0532696	0.696451		0.0532696	0.0370997	0.696451		9.95412	0.550071	0.383136	0.0552607	0.69652		0.0552607	0.0384901	0.69652		9.10965	0.485261	0.338193	0.0532689	0.69693		0.0532689	0.0371247	0.69693
46	11.6347	0.693364	0.483877	0.0595944	0.697868		0.0595944	0.0415891	0.697868		8.84383	0.470985	0.328146	0.0532558	0.696722		0.0532558	0.0371045	0.696722		9.88505	0.528297	0.368067	0.0534441	0.696703		0.0534441	0.0372347	0.696703
47	11.0663	0.620491	0.432231	0.0560703	0.696594		0.0560703	0.0390583	0.696594		8.99117	0.487112	0.339661	0.0541767	0.697295		0.0541767	0.0377771	0.697295		9.66792	0.516778	0.360048	0.0534529	0.696717		0.0534529	0.0372415	0.696717
48	11.0324	0.603871	0.420505	0.0547361	0.696348		0.0547361	0.0381154	0.696348		8.71043	0.465013	0.324034	0.0533857	0.696828		0.0533857	0.0372007	0.696828		10.4107	0.554323	0.386026	0.0532454	0.696392		0.0532454	0.0370797	0.696392
49	11.3256	0.629565	0.438149	0.0555877	0.695955		0.0555877	0.0386866	0.695955		8.8215	0.469734	0.327258	0.0532487	0.696689		0.0532487	0.0370978	0.696689		9.44636	0.503216	0.350584	0.0532708	0.696688		0.0532708	0.0371131	0.696688
50	11.5688	0.757088	0.542519	0.0654424	0.716586		0.0654424	0.0468951	0.716586		8.81531	0.469527	0.327127	0.0532627	0.696716		0.0532627	0.037109	0.696716		9.59196	0.510798	0.355824	0.0532527	0.696605		0.0532527	0.0370961	0.696605
51	10.7636	0.574015	0.399752	0.0533295	0.696414		0.0533295	0.0371394	0.696414		8.82907	0.470065	0.327538	0.0532406	0.696792		0.0532406	0.0370977	0.696792		10.4837	0.559114	0.389451	0.0533319	0.69655		0.0533319	0.0371484	0.69655
52	11.2393	0.598362	0.416838	0.0532381	0.696633		0.0532381	0.0370874	0.696633		8.49836	0.467084	0.32546	0.0549617	0.696791		0.0549617	0.0382968	0.696791		9.50436	0.506186	0.352627	0.0532582	0.696636		0.0532582	0.0371016	0.696636
53	10.668	0.604506	0.421002	0.0566653	0.69644		0.0566653	0.0394639	0.69644		8.86838	0.535079	0.372879	0.0603356	0.696867		0.0603356	0.0420459	0.696867		10.3862	0.596865	0.415463	0.0574669	0.696075		0.0574669	0.0400013	0.696075
54	11.4311	0.665688	0.463011	0.0582348	0.695538		0.0582348	0.0405045	0.695538		9.13931	0.48691	0.339257	0.0532764	0.696755		0.0532764	0.0371206	0.696755		8.64615	0.460474	0.320916	0.0532577	0.696927		0.0532577	0.0371167	0.696927
55	11.0469	0.588477	0.409956	0.0532706	0.696638		0.0532706	0.0371103	0.696638		8.52737	0.454228	0.316523	0.053267	0.696838		0.053267	0.0371185	0.696838		10.0328	0.557385	0.388234	0.0555564	0.696526		0.0555564	0.0386965	0.696526
56	11.3277	0.603225	0.420247	0.0532522	0.696667		0.0532522	0.0370991	0.696667		8.36852	0.445807	0.310643	0.0532719	0.69681		0.0532719	0.0371204	0.69681		9.69801	0.538378	0.375015	0.0555143	0.696564		0.0555143	0.0386693	0.696564
57	11.8322	0.693354	0.482402	0.0585991	0.695751		0.0585991	0.0407704	0.695751		8.72351	0.469005	0.326897	0.0537633	0.697001		0.0537633	0.0374731	0.697001		10.5966	0.587178	0.408863	0.0554119	0.696319		0.0554119	0.0385843	0.696319
58	11.5886	0.617209	0.429875	0.0532602	0.696482		0.0532602	0.0370947	0.696482		8.3856	0.447205	0.3117	0.0533302	0.696996		0.0533302	0.0371709	0.696996		9.89271	0.528362	0.367985	0.0534092	0.696463		0.0534092	0.0371976	0.696463
59	11.4462	0.6111	0.425785	0.0533891	0.696752		0.0533891	0.0371989	0.696752		8.61234	0.458726	0.319629	0.0532638	0.696775		0.0532638	0.0371129	0.696775		10.3765	0.552639	0.384876	0.0532586	0.696432		0.0532586	0.037091	0.696432
60	11.1056	0.592441	0.412514	0.053346	0.696296		0.053346	0.0371446	0.696296		9.19689	0.573455	0.399343	0.0623531	0.69638		0.0623531	0.0434215	0.69638		10.8934	0.580132	0.403896	0.0532552	0.696214		0.0532552	0.037077	0.696214
***	L4	C	H4	C | L4	H4 | C						L4	C	H4	C | L4	H4 | C						L4	C	H4	C | L4	H4 | C
***	tbdgy	tbdgy	tbdgy	tbdgy - St	tbdgy - St						tbdgy	tbdgy	tbdgy	tbdgy - St	tbdgy - St						tbdgy	tbdgy	tbdgy	tbdgy - St	tbdgy - St
***	12.6413	0.690565	0.481067	0.054564	0.720261	av	0.054564	0.0392662	0.720261		9.55519	0.5299	0.36955	0.0550494	0.720115	av	0.0550494	0.0395932	0.720115		10.1562	0.564686	0.393368	0.0548739	0.718729	av	0.0548739	0.0393979	0.718729
***	5.58678	5.5509	5.53606	0.578281	1.41942	stabw	0.00244411	0.00424363	0.0791913		5.09138	5.35816	5.35315	0.897173	1.37242	stabw	0.00382564	0.00445524	0.0765536		5.65977	6.59705	6.58562	0.969201	1.3332	stabw	0.0041196	0.00453901	0.0742227
***	0.706239	0.0383326	0.0266322	0.000315533	0.0102235	stabw/(n)^0.5	0.000315533	0.00054785	0.0102235		0.486491	0.0283929	0.0197826	0.000493888	0.00988302	stabw/(n)^0.5	0.000493888	0.000575169	0.00988302		0.574819	0.0372526	0.0259057	0.000531838	0.00958211	stabw/(n)^0.5	0.000531838	0.000585983	0.00958211
***	43.275	42.9971	42.8822	4.47934	10.9948	(stabw/(n)^0.5)/av /%	0.00578281	0.0139522	0.0141942		39.4376	41.5042	41.4653	6.94947	10.6307	(stabw/(n)^0.5)/av /%	0.00897173	0.014527	0.0137242		43.8404	51.1005	51.012	7.5074	10.3269	(stabw/(n)^0.5)/av /%	0.00969201	0.0148735	0.013332
***	5.47051	0.296923	0.206292	0.00244411	0.0791913						3.76834	0.219931	0.153235	0.00382564	0.0765536						4.45253	0.288557	0.200665	0.0041196	0.0742227
	11.4466	0.628514	0.437263	0.00104151	0.0839318
	WASO04 Laserablation scan speed 4 µm/s
	1st run						not blank corr				2nd run						not blank corr				3rd run						not blank corr
Cycle	27.94	28.925	29.916	28.925/27.94 (1)	29.916/28.925 (2)		29/28	30/28	30/29		27.94	28.925	29.916	28.925/27.94 (1)	29.916/28.925 (2)		29/28	30/28	30/29		27.94	28.925	29.916	28.925/27.94 (1)	29.916/28.925 (2)		29/28	30/28	30/29
1	0.077529	0.00413553	0.0040793	0.0533417	0.986405		0.0533417	0.0526165	0.986405		0.0788095	0.00418962	0.00407371	0.0531614	0.972333		0.0531614	0.0516906	0.972333		0.0820918	0.004351	0.00411654	0.0530016	0.946113		0.0530016	0.0501455	0.946113
2	0.0768475	0.00402641	0.00393087	0.0523948	0.976272		0.0523948	0.0511515	0.976272		0.0785009	0.00412843	0.00407525	0.0525908	0.98712		0.0525908	0.0519134	0.98712		0.0824179	0.00441437	0.00418976	0.0535607	0.949119		0.0535607	0.0508355	0.949119
3	0.0766162	0.00402317	0.00401126	0.0525107	0.997039		0.0525107	0.0523552	0.997039		0.0787342	0.00415489	0.00406682	0.0527712	0.978803		0.0527712	0.0516526	0.978803		0.0825423	0.00436423	0.00417236	0.0528727	0.956035		0.0528727	0.0505481	0.956035
4	0.0771389	0.00409134	0.00400615	0.0530386	0.979178		0.0530386	0.0519343	0.979178		0.0785194	0.00416555	0.00401326	0.0530512	0.963441		0.0530512	0.0511117	0.963441		0.0817958	0.00433507	0.00419427	0.0529986	0.967522		0.0529986	0.0512773	0.967522
5	0.0752879	0.0040167	0.0039792	0.0533513	0.990662		0.0533513	0.0528531	0.990662		0.0795666	0.00422747	0.00411836	0.0531312	0.974191		0.0531312	0.0517599	0.974191		0.0812215	0.00434195	0.00408423	0.0534582	0.940644		0.0534582	0.0502852	0.940644
6	3.93087	0.241035	0.168807	0.0613183	0.700345		0.0613183	0.042944	0.700345		4.13577	0.219957	0.154464	0.0531842	0.702243		0.0531842	0.0373482	0.702243		4.71339	0.250536	0.175388	0.0531541	0.700049		0.0531541	0.0372105	0.700049
7	17.5012	0.932637	0.649415	0.0532899	0.696321		0.0532899	0.0371069	0.696321		19.3305	1.02767	0.715506	0.0531632	0.696239		0.0531632	0.0370143	0.696239		20.1624	1.0726	0.746819	0.0531979	0.696273		0.0531979	0.0370402	0.696273
8	24.6743	1.317	0.916533	0.0533753	0.695926		0.0533753	0.0371452	0.695926		27.234	1.4504	1.00871	0.053257	0.695468		0.053257	0.0370386	0.695468		28.1415	1.49889	1.04233	0.0532625	0.695403		0.0532625	0.0370389	0.695403
9	29.3464	1.698	1.18015	0.0578606	0.695026		0.0578606	0.0402146	0.695026		28.0129	1.49275	1.03838	0.053288	0.695617		0.053288	0.037068	0.695617		29.0628	1.54791	1.07637	0.0532607	0.695374		0.0532607	0.0370361	0.695374
10	22.8327	1.21665	0.846067	0.0532853	0.695409		0.0532853	0.0370551	0.695409		27.4236	1.48257	1.03079	0.054062	0.695268		0.054062	0.0375876	0.695268		24.625	1.35718	0.943732	0.055114	0.695361		0.055114	0.0383241	0.695361
11	17.1088	0.911753	0.634566	0.0532915	0.695984		0.0532915	0.03709	0.695984		26.6525	1.43581	0.998359	0.0538715	0.695328		0.0538715	0.0374584	0.695328		23.0468	1.24288	0.864563	0.0539286	0.695612		0.0539286	0.0375134	0.695612
12	16.1121	0.858282	0.597351	0.0532693	0.695984		0.0532693	0.0370746	0.695984		24.2832	1.32843	0.924092	0.0547056	0.695627		0.0547056	0.0380547	0.695627		21.2042	1.135	0.789268	0.0535274	0.695388		0.0535274	0.0372223	0.695388
13	16.8149	0.895302	0.623159	0.0532447	0.696032		0.0532447	0.03706	0.696032		22.6799	1.20784	0.839948	0.053256	0.695413		0.053256	0.0370349	0.695413		21.2971	1.17611	0.818143	0.0552243	0.695632		0.0552243	0.0384158	0.695632
14	17.4746	0.931238	0.648109	0.0532909	0.695965		0.0532909	0.0370886	0.695965		21.0587	1.16562	0.810728	0.0553507	0.695536		0.0553507	0.0384984	0.695536		22.8845	1.23722	0.860569	0.0540638	0.695566		0.0540638	0.0376049	0.695566
15	16.0239	0.853386	0.593951	0.0532571	0.695993		0.0532571	0.0370666	0.695993		20.3002	1.08188	0.752529	0.053294	0.695577		0.053294	0.03707	0.695577		24.1664	1.35188	0.939887	0.0559403	0.695246		0.0559403	0.0388923	0.695246
16	18.1111	0.996869	0.693504	0.055042	0.695683		0.055042	0.0382918	0.695683		19.786	1.05365	0.732912	0.0532524	0.695591		0.0532524	0.0370419	0.695591		21.8841	1.16646	0.811356	0.0533018	0.695569		0.0533018	0.0370751	0.695569
17	18.6222	0.991943	0.690042	0.0532668	0.695647		0.0532668	0.0370549	0.695647		18.8125	1.02356	0.712102	0.0544085	0.69571		0.0544085	0.0378525	0.69571		21.6278	1.18983	0.82738	0.0550139	0.695377		0.0550139	0.0382554	0.695377
18	19.4596	1.09115	0.758836	0.0560726	0.695445		0.0560726	0.0389954	0.695445		18.5879	1.09572	0.76154	0.0589481	0.695011		0.0589481	0.0409696	0.695011		19.6924	1.08119	0.751758	0.0549038	0.695306		0.0549038	0.038175	0.695306
19	18.0758	0.963019	0.670002	0.0532768	0.695731		0.0532768	0.0370663	0.695731		17.9893	1.01761	0.707594	0.0565676	0.69535		0.0565676	0.0393342	0.69535		19.4561	1.0641	0.740301	0.0546923	0.695706		0.0546923	0.0380497	0.695706
20	17.2771	0.92064	0.640613	0.0532868	0.695835		0.0532868	0.0370788	0.695835		16.8885	0.899423	0.625859	0.0532564	0.695845		0.0532564	0.0370582	0.695845		21.2252	1.20111	0.834902	0.0565888	0.69511		0.0565888	0.0393354	0.69511
21	16.5516	0.881702	0.61362	0.05327	0.695949		0.05327	0.0370732	0.695949		16.6503	0.887212	0.617252	0.0532851	0.695721		0.0532851	0.0370716	0.695721		21.0426	1.19551	0.83112	0.0568139	0.6952		0.0568139	0.039497	0.6952
22	15.2463	0.814278	0.566749	0.0534083	0.696014		0.0534083	0.0371729	0.696014		16.4735	0.877144	0.610195	0.0532458	0.695661		0.0532458	0.037041	0.695661		19.2867	1.02704	0.714481	0.0532514	0.695669		0.0532514	0.0370453	0.695669
23	15.5825	0.830604	0.57808	0.0533036	0.695975		0.0533036	0.037098	0.695975		18.324	1.22019	0.848836	0.0665896	0.695659		0.0665896	0.0463236	0.695659		20.6086	1.14246	0.79431	0.0554359	0.695264		0.0554359	0.0385426	0.695264
24	20.5853	1.37143	0.954642	0.0666219	0.696091		0.0666219	0.0463749	0.696091		15.5439	0.828167	0.576219	0.0532791	0.695777		0.0532791	0.0370703	0.695777		20.8145	1.11954	0.778663	0.0537868	0.695518		0.0537868	0.0374097	0.695518
25	17.5505	0.935489	0.650825	0.0533026	0.695706		0.0533026	0.0370829	0.695706		17.0666	0.969157	0.673947	0.0567866	0.695396		0.0567866	0.0394891	0.695396		18.6498	0.993849	0.691193	0.0532899	0.695471		0.0532899	0.0370616	0.695471
26	16.2191	1.00577	0.703854	0.0620115	0.699818		0.0620115	0.0433967	0.699818		16.92	0.901881	0.627615	0.0533027	0.695895		0.0533027	0.0370931	0.695895		17.2603	0.919105	0.639649	0.0532496	0.695948		0.0532496	0.037059	0.695948
27	16.2772	0.883779	0.614969	0.0542956	0.69584		0.0542956	0.037781	0.69584		17.7129	0.943396	0.656477	0.0532604	0.695866		0.0532604	0.0370621	0.695866		18.7538	1.01054	0.703051	0.0538844	0.695722		0.0538844	0.0374885	0.695722
28	16.4766	0.878329	0.611007	0.0533077	0.695647		0.0533077	0.0370833	0.695647		17.5574	0.939511	0.6537	0.0535109	0.695787		0.0535109	0.0372322	0.695787		18.473	0.983964	0.684269	0.0532651	0.69542		0.0532651	0.0370416	0.69542
29	16.7045	0.889461	0.61901	0.0532468	0.695938		0.0532468	0.0370565	0.695938		17.6723	0.953295	0.663208	0.053943	0.6957		0.053943	0.0375281	0.6957		18.4061	0.980077	0.681789	0.0532475	0.695648		0.0532475	0.0370415	0.695648
30	16.2111	0.863462	0.600624	0.0532638	0.6956		0.0532638	0.0370503	0.6956		17.8957	0.953512	0.663387	0.0532816	0.695731		0.0532816	0.0370696	0.695731		16.7686	0.892672	0.621197	0.0532347	0.695885		0.0532347	0.0370452	0.695885
31	16.5716	0.895136	0.622841	0.0540163	0.695806		0.0540163	0.0375849	0.695806		17.2956	0.949141	0.660314	0.0548775	0.695696		0.0548775	0.0381781	0.695696		17.8762	0.952127	0.662389	0.0532623	0.695694		0.0532623	0.0370542	0.695694
32	17.3195	0.940833	0.654558	0.0543222	0.695721		0.0543222	0.0377931	0.695721		17.6805	0.942447	0.655693	0.0533042	0.695734		0.0533042	0.0370856	0.695734		18.3597	0.978589	0.680919	0.0533009	0.695817		0.0533009	0.0370877	0.695817
33	16.1154	0.861529	0.599282	0.05346	0.695603		0.05346	0.0371869	0.695603		16.6595	0.891137	0.620098	0.0534912	0.695851		0.0534912	0.0372219	0.695851		18.6166	0.991936	0.68995	0.0532822	0.695559		0.0532822	0.0370609	0.695559
34	16.2269	0.864427	0.601488	0.0532713	0.695822		0.0532713	0.0370673	0.695822		15.4589	0.823353	0.572799	0.0532608	0.695691		0.0532608	0.037053	0.695691		17.6716	0.942508	0.655677	0.0533346	0.695673		0.0533346	0.0371034	0.695673
35	16.224	0.864811	0.601718	0.0533044	0.69578		0.0533044	0.0370881	0.69578		16.3605	0.881626	0.613321	0.0538874	0.695671		0.0538874	0.0374879	0.695671		17.2783	0.923652	0.642744	0.0534573	0.695872		0.0534573	0.0371994	0.695872
36	17.0055	0.905728	0.630162	0.0532608	0.695752		0.0532608	0.0370563	0.695752		15.3695	0.828763	0.57698	0.0539226	0.696195		0.0539226	0.0375406	0.696195		17.9217	1.0088	0.701452	0.0562893	0.695335		0.0562893	0.0391399	0.695335
37	16.9735	0.957075	0.665419	0.0563863	0.695263		0.0563863	0.0392033	0.695263		16.1008	0.896723	0.623584	0.0556945	0.695403		0.0556945	0.0387301	0.695403		17.6954	0.942408	0.655559	0.0532571	0.695622		0.0532571	0.0370468	0.695622
38	16.0191	0.853173	0.593664	0.0532596	0.695831		0.0532596	0.0370597	0.695831		15.0547	0.802477	0.558532	0.0533042	0.69601		0.0533042	0.0371002	0.69601		17.1041	0.911036	0.633819	0.0532642	0.695712		0.0532642	0.0370565	0.695712
39	16.6889	0.888749	0.618288	0.0532539	0.695684		0.0532539	0.0370479	0.695684		14.7895	0.787868	0.548332	0.0532722	0.69597		0.0532722	0.0370758	0.69597		17.6522	0.939823	0.653925	0.0532411	0.695795		0.0532411	0.0370449	0.695795
40	17.3165	0.992214	0.691832	0.0572988	0.697261		0.0572988	0.0399522	0.697261		14.0949	0.75045	0.522177	0.0532426	0.695818		0.0532426	0.0370472	0.695818		17.7388	0.950044	0.660922	0.0535575	0.695675		0.0535575	0.0372586	0.695675
41	16.1604	0.862353	0.599721	0.0533622	0.695447		0.0533622	0.0371106	0.695447		14.6035	0.798881	0.555686	0.0547047	0.695581		0.0547047	0.0380515	0.695581		17.2806	0.92048	0.640392	0.0532667	0.695716		0.0532667	0.0370585	0.695716
42	15.586	0.831386	0.578551	0.053342	0.695887		0.053342	0.03712	0.695887		15.4043	0.853788	0.59393	0.0554254	0.695641		0.0554254	0.0385562	0.695641		16.712	0.921654	0.640995	0.0551493	0.695483		0.0551493	0.0383554	0.695483
43	15.1338	0.875373	0.608767	0.0578422	0.695437		0.0578422	0.0402256	0.695437		14.4371	0.77054	0.536312	0.0533721	0.696021		0.0533721	0.0371481	0.696021		16.4859	0.880311	0.612298	0.053398	0.695547		0.053398	0.0371408	0.695547
44	15.3077	0.834516	0.58056	0.0545162	0.695684		0.0545162	0.037926	0.695684		15.7895	0.842174	0.586024	0.0533377	0.695847		0.0533377	0.0371149	0.695847		15.7908	0.841696	0.585582	0.053303	0.695717		0.053303	0.0370838	0.695717
45	15.833	0.843364	0.586868	0.0532664	0.695865		0.0532664	0.0370662	0.695865		15.3912	0.831033	0.578364	0.053994	0.695959		0.053994	0.0375776	0.695959		16.3963	0.873801	0.60813	0.0532925	0.695959		0.0532925	0.0370894	0.695959
46	16.9088	0.900441	0.626415	0.0532528	0.695675		0.0532528	0.0370467	0.695675		15.8197	0.921305	0.640608	0.058238	0.695327		0.058238	0.0404944	0.695327		17.4093	0.9268	0.6449	0.053236	0.695835		0.053236	0.0370435	0.695835
47	17.553	0.934467	0.650255	0.0532369	0.695857		0.0532369	0.0370453	0.695857		16.6285	0.960545	0.667927	0.0577649	0.695362		0.0577649	0.0401675	0.695362		18.4094	0.986184	0.68604	0.0535697	0.695651		0.0535697	0.0372658	0.695651
48	18.0362	1.05584	0.733939	0.0585405	0.69512		0.0585405	0.0406927	0.69512		15.5352	0.827269	0.575684	0.0532511	0.695886		0.0532511	0.0370567	0.695886		16.9961	0.908923	0.631999	0.0534783	0.695328		0.0534783	0.0371849	0.695328
49	18.4303	1.02876	0.715476	0.055819	0.695476		0.055819	0.0388208	0.695476		15.257	0.812598	0.56544	0.0532608	0.695843		0.0532608	0.0370611	0.695843		17.6184	0.938357	0.652857	0.0532601	0.695745		0.0532601	0.0370555	0.695745
50	18.3263	0.97637	0.679082	0.0532771	0.695517		0.0532771	0.0370551	0.695517		15.2882	0.814515	0.566929	0.0532775	0.696033		0.0532775	0.0370829	0.696033		17.4806	0.930724	0.647561	0.0532432	0.69576		0.0532432	0.0370445	0.69576
51	18.2764	0.974578	0.677979	0.0533244	0.695664		0.0533244	0.0370959	0.695664		15.9562	0.868319	0.604101	0.0544191	0.695714		0.0544191	0.0378601	0.695714		17.8446	0.950129	0.661083	0.0532447	0.695783		0.0532447	0.0370467	0.695783
52	18.2444	0.972168	0.676225	0.0532859	0.695584		0.0532859	0.0370649	0.695584		16.8485	0.896885	0.624143	0.0532324	0.695901		0.0532324	0.0370445	0.695901		19.7453	1.05146	0.73128	0.053251	0.695492		0.053251	0.0370356	0.695492
53	20.2473	1.14335	0.796501	0.0564694	0.696637		0.0564694	0.0393387	0.696637		16.3381	0.873322	0.607637	0.053453	0.695776		0.053453	0.0371913	0.695776		17.8569	0.950798	0.661237	0.0532454	0.695455		0.0532454	0.0370298	0.695455
54	19.8244	1.20253	0.83635	0.0606588	0.695494		0.0606588	0.0421878	0.695494		15.8219	0.868949	0.60444	0.0549207	0.695599		0.0549207	0.0382028	0.695599		17.8479	0.950653	0.66133	0.0532641	0.695659		0.0532641	0.0370537	0.695659
55	16.415	0.874265	0.60819	0.0532602	0.695659		0.0532602	0.037051	0.695659		14.1271	0.752285	0.523723	0.0532512	0.696177		0.0532512	0.0370723	0.696177		18.423	0.981148	0.682106	0.0532567	0.695212		0.0532567	0.0370247	0.695212
56	15.6981	0.88507	0.615386	0.0563805	0.695296		0.0563805	0.0392012	0.695296		13.641	0.726243	0.505518	0.0532396	0.696072		0.0532396	0.0370586	0.696072		18.7748	1.04524	0.726723	0.0556725	0.695269		0.0556725	0.0387074	0.695269
57	15.0527	0.80501	0.560027	0.0534794	0.695678		0.0534794	0.0372044	0.695678		14.3559	0.764243	0.531965	0.0532356	0.696068		0.0532356	0.0370556	0.696068		18.4557	0.984098	0.684226	0.0533221	0.695282		0.0533221	0.0370739	0.695282
58	16.4711	0.884563	0.615364	0.0537039	0.695671		0.0537039	0.0373602	0.695671		14.5497	0.787878	0.548206	0.0541506	0.695801		0.0541506	0.0376781	0.695801		16.186	0.862769	0.600238	0.0533034	0.695711		0.0533034	0.0370838	0.695711
59	18.864	1.05736	0.735112	0.0560519	0.695231		0.0560519	0.038969	0.695231		13.4212	0.723775	0.503743	0.0539278	0.695995		0.0539278	0.0375335	0.695995		16.4001	0.875747	0.609121	0.053399	0.695545		0.053399	0.0371414	0.695545
60	18.0131	0.961697	0.668988	0.0533888	0.695633		0.0533888	0.037139	0.695633		13.6769	0.734092	0.510756	0.0536736	0.695765		0.0536736	0.0373443	0.695765		14.7773	0.787607	0.548001	0.0532984	0.695781		0.0532984	0.037084	0.695781
***	L4	C	H4	C | L4	H4 | C						L4	C	H4	C | L4	H4 | C						L4	C	H4	C | L4	H4 | C
***	tbdgy	tbdgy	tbdgy	tbdgy - St	tbdgy - St						tbdgy	tbdgy	tbdgy	tbdgy - St	tbdgy - St						tbdgy	tbdgy	tbdgy	tbdgy - St	tbdgy - St
***	15.8666	0.868677	0.604558	0.0545898	0.720075	av	0.0545898	0.0392696	0.720075		15.7857	0.857664	0.596794	0.0541907	0.719122	av	0.0541907	0.0389402	0.719122		17.3078	0.932816	0.648945	0.0537871	0.717014	av	0.0537871	0.0385528	0.717014
***	4.56403	4.69817	4.68981	0.628264	1.44977	stabw	0.00265662	0.00433796	0.0808635		4.97966	5.00604	4.99668	0.499076	1.39836	stabw	0.00209492	0.00411235	0.077893		4.60062	4.64166	4.6338	0.232258	1.28679	stabw	0.000967663	0.00372743	0.071468
***	0.724157	0.0408119	0.0283527	0.000342968	0.0104394	stabw/(n)^0.5	0.000342968	0.000560028	0.0104394		0.786074	0.042935	0.0298199	0.000270453	0.0100559	stabw/(n)^0.5	0.000270453	0.000530902	0.0100559		0.796268	0.0432981	0.0300708	0.000124925	0.00922648	stabw/(n)^0.5	0.000124925	0.00048121	0.00922648
***	35.3528	36.3919	36.3271	4.86651	11.2299	(stabw/(n)^0.5)/av /%	0.00628264	0.0142611	0.0144977		38.5723	38.7766	38.7041	3.86582	10.8317	(stabw/(n)^0.5)/av /%	0.00499076	0.0136338	0.0139836		35.6363	35.9541	35.8933	1.79906	9.96745	(stabw/(n)^0.5)/av /%	0.00232258	0.0124818	0.0128679
***	5.60929	0.316128	0.219619	0.00265662	0.0808635						6.0889	0.332573	0.230984	0.00209492	0.077893						6.16786	0.335386	0.232928	0.000967663	0.071468
	WASO04 Laserablation scan speed 6 µm/s
	1st run						not blank corr				2nd run						not blank corr				3rd run						not blank corr
Cycle	27.94	28.925	29.916	28.925/27.94 (1)	29.916/28.925 (2)		29/28	30/28	30/29		27.94	28.925	29.916	28.925/27.94 (1)	29.916/28.925 (2)		29/28	30/28	30/29		27.94	28.925	29.916	28.925/27.94 (1)	29.916/28.925 (2)		29/28	30/28	30/29
1	0.0698819	0.00369254	0.00393487	0.0528397	1.06563		0.0528397	0.0563074	1.06563		0.0770291	0.00407299	0.0041085	0.0528761	1.00872		0.0528761	0.053337	1.00872		0.0774381	0.00416745	0.00407906	0.0538165	0.97879		0.0538165	0.052675	0.97879
2	0.0711119	0.00376356	0.00383288	0.0529245	1.01842		0.0529245	0.0538992	1.01842		0.076464	0.00405239	0.00393132	0.0529973	0.970126		0.0529973	0.0514141	0.970126		0.0766698	0.0041211	0.0040996	0.0537513	0.994783		0.0537513	0.0534709	0.994783
3	0.0702388	0.00374733	0.00387473	0.0533513	1.034		0.0533513	0.0551651	1.034		0.0745727	0.00395373	0.00392711	0.0530185	0.993266		0.0530185	0.0526615	0.993266		0.236661	0.0125686	0.0100087	0.053108	0.796324		0.053108	0.0422912	0.796324
4	0.0691984	0.00366493	0.00376247	0.0529626	1.02661		0.0529626	0.0543722	1.02661		0.0748414	0.00396008	0.00406498	0.052913	1.02649		0.052913	0.0543145	1.02649		0.0812786	0.00435897	0.00418963	0.0536299	0.961152		0.0536299	0.0515465	0.961152
5	0.0754455	0.00396641	0.00408242	0.0525732	1.02925		0.0525732	0.0541108	1.02925		0.082928	0.00440536	0.00428215	0.0531227	0.972032		0.0531227	0.051637	0.972032		0.0787227	0.00419613	0.00413078	0.0533027	0.984425		0.0533027	0.0524725	0.984425
6	14.6451	0.78633	0.548542	0.0536923	0.697598		0.0536923	0.0374556	0.697598		7.98355	0.431526	0.301246	0.054052	0.698095		0.054052	0.0377334	0.698095		6.02501	0.319904	0.224086	0.0530959	0.70048		0.0530959	0.0371926	0.70048
7	46.3013	2.62557	1.82516	0.0567061	0.695149		0.0567061	0.0394192	0.695149		27.8573	1.49494	1.04009	0.0536642	0.695738		0.0536642	0.0373362	0.695738		21.0572	1.12125	0.780459	0.0532479	0.696062		0.0532479	0.0370638	0.696062
8	50.7016	3.14853	2.18788	0.0620992	0.69489		0.0620992	0.0431521	0.69489		35.9763	1.92643	1.33927	0.0535472	0.695208		0.0535472	0.0372264	0.695208		28.9204	1.54422	1.07393	0.0533954	0.695453		0.0533954	0.037134	0.695453
9	49.9346	2.87982	2.00106	0.0576718	0.694854		0.0576718	0.0400735	0.694854		33.8942	1.80498	1.25515	0.0532534	0.695384		0.0532534	0.0370316	0.695384		27.9718	1.53778	1.06941	0.0549762	0.695425		0.0549762	0.0382318	0.695425
10	45.084	2.45588	1.70646	0.0544735	0.694844		0.0544735	0.0378506	0.694844		30.4181	1.6703	1.16109	0.0549114	0.695135		0.0549114	0.0381709	0.695135		26.8505	1.43038	0.994538	0.0532722	0.695294		0.0532722	0.0370399	0.695294
11	43.169	2.32816	1.61775	0.0539312	0.694861		0.0539312	0.0374747	0.694861		33.2864	1.86859	1.29895	0.0561368	0.69515		0.0561368	0.0390235	0.69515		27.5769	1.4786	1.02859	0.0536172	0.695656		0.0536172	0.0372991	0.695656
12	40.6931	2.19498	1.52541	0.0539398	0.694954		0.0539398	0.0374857	0.694954		29.1392	1.559	1.08363	0.0535018	0.695085		0.0535018	0.0371883	0.695085		25.4784	1.36531	0.949444	0.053587	0.695405		0.053587	0.0372647	0.695405
13	43.9575	2.36409	1.64344	0.0537813	0.695169		0.0537813	0.0373871	0.695169		29.4353	1.6001	1.11236	0.05436	0.695178		0.05436	0.0377899	0.695178		28.7707	1.53749	1.06933	0.0534394	0.695504		0.0534394	0.0371674	0.695504
14	44.4972	2.39203	1.66214	0.0537569	0.694864		0.0537569	0.0373537	0.694864		26.0877	1.40013	0.973781	0.0536701	0.695494		0.0536701	0.0373272	0.695494		30.3	1.74814	1.21504	0.0576945	0.695044		0.0576945	0.0401002	0.695044
15	38.9142	2.13361	1.48263	0.0548286	0.694891		0.0548286	0.0380999	0.694891		27.1251	1.45849	1.01379	0.0537691	0.695094		0.0537691	0.0373746	0.695094		29.5438	1.57893	1.09801	0.0534436	0.695412		0.0534436	0.0371653	0.695412
16	47.4877	2.61013	1.81377	0.0549644	0.694896		0.0549644	0.0381945	0.694896		28.8178	1.53795	1.06939	0.0533682	0.695332		0.0533682	0.0371086	0.695332		27.773	1.48117	1.02983	0.0533313	0.695284		0.0533313	0.0370804	0.695284
17	45.1394	2.41318	1.67706	0.0534606	0.694959		0.0534606	0.0371529	0.694959		29.5338	1.5771	1.09651	0.0533999	0.695266		0.0533999	0.0371271	0.695266		28.7239	1.54273	1.07253	0.0537091	0.695213		0.0537091	0.0373392	0.695213
18	45.8116	2.5017	1.7383	0.0546084	0.694847		0.0546084	0.0379445	0.694847		30.4956	1.62655	1.1309	0.0533373	0.695275		0.0533373	0.0370841	0.695275		26.2348	1.46781	1.0211	0.0559491	0.695657		0.0559491	0.0389214	0.695657
19	46.9704	2.51727	1.74908	0.0535927	0.694833		0.0535927	0.037238	0.694833		30.4233	1.6254	1.13024	0.053426	0.695363		0.053426	0.0371505	0.695363		27.5376	1.59327	1.10747	0.057858	0.695094		0.057858	0.0402168	0.695094
20	47.1296	2.54036	1.76497	0.0539015	0.694772		0.0539015	0.0374493	0.694772		30.4684	1.62696	1.13108	0.0533983	0.695212		0.0533983	0.0371231	0.695212		26.1382	1.3936	0.969136	0.0533165	0.695421		0.0533165	0.0370774	0.695421
21	43.8079	2.35748	1.63832	0.053814	0.694947		0.053814	0.0373979	0.694947		33.7208	1.82255	1.26689	0.0540483	0.695119		0.0540483	0.0375701	0.695119		25.9003	1.47066	1.0222	0.0567814	0.69506		0.0567814	0.0394665	0.69506
22	46.1724	2.46736	1.7146	0.0534381	0.694912		0.0534381	0.0371347	0.694912		34.1171	1.88104	1.30705	0.0551348	0.694858		0.0551348	0.0383108	0.694858		21.7819	1.16305	0.808854	0.0533951	0.695461		0.0533951	0.0371342	0.695461
23	45.2598	2.41852	1.68041	0.0534364	0.694807		0.0534364	0.037128	0.694807		32.6948	1.78198	1.23875	0.0545035	0.695156		0.0545035	0.0378884	0.695156		21.4085	1.14648	0.797506	0.0535526	0.695613		0.0535526	0.0372519	0.695613
24	46.6528	2.50378	1.73964	0.0536685	0.694804		0.0536685	0.0372891	0.694804		32.1565	1.71416	1.19146	0.0533067	0.695072		0.0533067	0.037052	0.695072		22.3644	1.22483	0.852242	0.0547668	0.695806		0.0547668	0.0381071	0.695806
25	43.5326	2.32294	1.61413	0.0533609	0.694866		0.0533609	0.0370787	0.694866		33.9866	1.81052	1.25851	0.0532716	0.695109		0.0532716	0.0370296	0.695109		21.8434	1.26209	0.876862	0.0577789	0.694769		0.0577789	0.040143	0.694769
26	40.4431	2.18936	1.52126	0.0541345	0.694843		0.0541345	0.037615	0.694843		34.2983	1.84315	1.28138	0.0537387	0.695211		0.0537387	0.0373597	0.695211		21.1055	1.12409	0.781862	0.0532606	0.695549		0.0532606	0.0370453	0.695549
27	36.8473	2.02587	1.4075	0.0549802	0.694765		0.0549802	0.0381983	0.694765		34.5398	1.84939	1.28524	0.0535439	0.694954		0.0535439	0.0372105	0.694954		22.8467	1.22176	0.849736	0.0534762	0.695504		0.0534762	0.0371929	0.695504
28	39.1189	2.1144	1.46922	0.0540507	0.694861		0.0540507	0.0375577	0.694861		29.6225	1.66236	1.15868	0.0561183	0.697009		0.0561183	0.0391149	0.697009		21.0771	1.12312	0.781262	0.0532863	0.695617		0.0532863	0.0370669	0.695617
29	36.6512	1.95809	1.36073	0.0534251	0.694928		0.0534251	0.0371266	0.694928		31.2574	1.83057	1.27555	0.0585643	0.696803		0.0585643	0.0408078	0.696803		22.7659	1.21503	0.845367	0.0533705	0.69576		0.0533705	0.0371331	0.69576
30	43.4022	2.33714	1.62395	0.0538484	0.694844		0.0538484	0.0374162	0.694844		28.1063	1.5412	1.07139	0.0548347	0.695163		0.0548347	0.0381191	0.695163		23.3775	1.38937	0.965589	0.0594317	0.694986		0.0594317	0.0413042	0.694986
31	44.4084	2.39598	1.66415	0.0539533	0.69456		0.0539533	0.0374738	0.69456		27.5553	1.46867	1.02079	0.0532989	0.695042		0.0532989	0.037045	0.695042		20.2581	1.08059	0.751358	0.0533412	0.695321		0.0533412	0.0370892	0.695321
32	38.1346	2.03242	1.4118	0.053296	0.694641		0.053296	0.0370216	0.694641		28.4742	1.5167	1.05468	0.0532659	0.695379		0.0532659	0.03704	0.695379		19.3049	1.0693	0.743582	0.0553901	0.695389		0.0553901	0.0385177	0.695389
33	36.3455	1.93897	1.34792	0.0533483	0.695173		0.0533483	0.0370863	0.695173		29.5382	1.57385	1.0941	0.0532819	0.695177		0.0532819	0.0370403	0.695177		19.1363	1.05266	0.732117	0.0550087	0.695492		0.0550087	0.0382581	0.695492
34	41.2343	2.21901	1.54202	0.0538147	0.694911		0.0538147	0.0373965	0.694911		27.0388	1.54247	1.07191	0.0570464	0.694931		0.0570464	0.0396433	0.694931		20.5828	1.0959	0.762308	0.0532434	0.695601		0.0532434	0.0370361	0.695601
35	42.2285	2.25373	1.56609	0.0533699	0.694889		0.0533699	0.0370861	0.694889		26.5004	1.43636	0.998559	0.0542014	0.695201		0.0542014	0.0376809	0.695201		23.375	1.24485	0.865806	0.0532559	0.695508		0.0532559	0.0370399	0.695508
36	39.1332	2.12512	1.47629	0.0543048	0.694686		0.0543048	0.0377248	0.694686		27.0226	1.44009	1.00127	0.053292	0.695286		0.053292	0.0370532	0.695286		22.3947	1.1925	0.829242	0.0532493	0.695379		0.0532493	0.0370284	0.695379
37	41.4172	2.21406	1.53848	0.0534575	0.694871		0.0534575	0.0371461	0.694871		27.9777	1.50007	1.04285	0.0536167	0.695199		0.0536167	0.0372743	0.695199		23.1418	1.23327	0.857957	0.0532919	0.695676		0.0532919	0.0370739	0.695676
38	41.7361	2.3847	1.65622	0.0571377	0.694519		0.0571377	0.0396832	0.694519		25.0972	1.34222	0.933304	0.0534807	0.695344		0.0534807	0.0371875	0.695344		22.618	1.20461	0.837586	0.0532588	0.695318		0.0532588	0.0370318	0.695318
39	32.4243	1.73035	1.20241	0.0533659	0.694895		0.0533659	0.0370837	0.694895		25.9597	1.38607	0.963901	0.053393	0.695422		0.053393	0.0371307	0.695422		20.9425	1.13509	0.789241	0.0542002	0.695311		0.0542002	0.037686	0.695311
40	32.3769	1.73466	1.20551	0.0535773	0.694955		0.0535773	0.0372338	0.694955		32.5713	2.09068	1.45344	0.0641879	0.6952		0.0641879	0.0446234	0.6952		23.4615	1.3907	0.966486	0.0592758	0.694964		0.0592758	0.0411946	0.694964
41	30.9967	1.65049	1.14704	0.0532472	0.694971		0.0532472	0.0370053	0.694971		31.5385	1.82076	1.26344	0.0577313	0.693907		0.0577313	0.0400602	0.693907		22.045	1.2243	0.851044	0.0555365	0.695127		0.0555365	0.0386049	0.695127
42	36.7408	1.95829	1.36092	0.0533002	0.694952		0.0533002	0.037041	0.694952		29.1102	1.57077	1.09201	0.0539595	0.695205		0.0539595	0.0375129	0.695205		19.0804	1.02346	0.711574	0.0536392	0.695264		0.0536392	0.0372934	0.695264
43	33.5123	1.79351	1.24653	0.0535179	0.695023		0.0535179	0.0371962	0.695023		28.2583	1.56963	1.09077	0.0555457	0.694923		0.0555457	0.0386	0.694923		18.6115	1.02817	0.714866	0.0552438	0.69528		0.0552438	0.0384099	0.69528
44	30.9858	1.69213	1.17547	0.0546099	0.694668		0.0546099	0.0379357	0.694668		27.3525	1.54103	1.07138	0.0563395	0.695234		0.0563395	0.0391692	0.695234		19.1282	1.02084	0.710032	0.0533685	0.695533		0.0533685	0.0371196	0.695533
45	34.7911	1.87579	1.30362	0.0539157	0.694973		0.0539157	0.03747	0.694973		29.6481	1.63209	1.13434	0.055049	0.695021		0.055049	0.0382602	0.695021		21.1125	1.13788	0.79142	0.0538962	0.695519		0.0538962	0.0374859	0.695519
46	31.5008	1.69391	1.17723	0.0537735	0.694976		0.0537735	0.0373713	0.694976		29.3223	1.56222	1.08565	0.0532776	0.694937		0.0532776	0.0370246	0.694937		21.7266	1.16992	0.813495	0.0538472	0.695344		0.0538472	0.0374423	0.695344
47	35.7731	1.90923	1.32707	0.0533705	0.695082		0.0533705	0.0370969	0.695082		27.3964	1.48648	1.0334	0.0542581	0.695203		0.0542581	0.0377204	0.695203		20.7802	1.18386	0.831809	0.0569706	0.702623		0.0569706	0.0400288	0.702623
48	35.8114	1.90873	1.32622	0.0532995	0.694818		0.0532995	0.0370335	0.694818		29.7891	1.66268	1.16312	0.0558151	0.699546		0.0558151	0.0390452	0.699546		19.056	1.0144	0.705658	0.0532329	0.695639		0.0532329	0.0370308	0.695639
49	37.0578	1.9871	1.38157	0.0536218	0.695268		0.0536218	0.0372815	0.695268		27.731	1.47878	1.02795	0.0533258	0.695137		0.0533258	0.0370687	0.695137		19.3807	1.03173	0.717629	0.053235	0.695558		0.053235	0.037028	0.695558
50	35.1374	1.92932	1.34078	0.0549079	0.694951		0.0549079	0.0381583	0.694951		30.5803	1.89735	1.32066	0.0620449	0.696051		0.0620449	0.0431864	0.696051		20.8566	1.14028	0.792939	0.0546723	0.695391		0.0546723	0.0380186	0.695391
51	34.455	1.85311	1.28759	0.0537836	0.694826		0.0537836	0.0373702	0.694826		27.7967	1.48131	1.02955	0.053291	0.695023		0.053291	0.0370385	0.695023		20.8213	1.11001	0.772131	0.0533112	0.695607		0.0533112	0.0370837	0.695607
52	31.1367	1.6609	1.15428	0.0533424	0.694972		0.0533424	0.0370715	0.694972		28.9795	1.62412	1.12849	0.0560438	0.694834		0.0560438	0.0389412	0.694834		19.4766	1.08175	0.752196	0.0555411	0.695349		0.0555411	0.0386204	0.695349
53	33.0477	1.75979	1.22315	0.0532499	0.695056		0.0532499	0.0370117	0.695056		24.9306	1.3273	0.922776	0.0532398	0.695228		0.0532398	0.0370138	0.695228		18.4607	0.983059	0.683739	0.0532514	0.695522		0.0532514	0.0370375	0.695522
54	34.3327	1.8317	1.27271	0.0533516	0.694825		0.0533516	0.03707	0.694825		25.0274	1.33901	0.931081	0.0535018	0.695351		0.0535018	0.0372025	0.695351		18.5845	0.992449	0.69038	0.0534019	0.695632		0.0534019	0.0371481	0.695632
55	34.7759	1.8532	1.28799	0.0532899	0.69501		0.0532899	0.037037	0.69501		26.7509	1.44815	1.00664	0.0541344	0.695124		0.0541344	0.0376301	0.695124		19.9145	1.06338	0.739637	0.0533974	0.695551		0.0533974	0.0371406	0.695551
56	36.4532	1.97601	1.37291	0.0542068	0.694787		0.0542068	0.0376622	0.694787		26.8612	1.43115	0.994771	0.0532796	0.695083		0.0532796	0.0370338	0.695083		21.2502	1.14546	0.796487	0.0539032	0.695345		0.0539032	0.0374814	0.695345
57	34.4767	1.85242	1.28704	0.0537294	0.694788		0.0537294	0.0373306	0.694788		26.2456	1.40316	0.975125	0.0534626	0.694951		0.0534626	0.0371539	0.694951		19.7281	1.16085	0.807164	0.0588424	0.695322		0.0588424	0.0409144	0.695322
58	34.5053	1.8384	1.2777	0.0532788	0.695004		0.0532788	0.037029	0.695004		26.8161	1.43529	0.99801	0.0535235	0.695337		0.0535235	0.0372168	0.695337		20.4527	1.09186	0.759263	0.0533848	0.695384		0.0533848	0.0371229	0.695384
59	30.8874	1.65852	1.15252	0.0536958	0.694908		0.0536958	0.0373136	0.694908		27.3371	1.46028	1.01511	0.0534176	0.695144		0.0534176	0.037133	0.695144		21.7136	1.16377	0.80946	0.0535963	0.695551		0.0535963	0.0372789	0.695551
60	27.9062	1.48587	1.03314	0.0532451	0.69531		0.0532451	0.0370219	0.69531		28.5279	1.52128	1.05747	0.0533261	0.695118		0.0533261	0.0370679	0.695118		22.033	1.18803	0.826284	0.0539205	0.695506		0.0539205	0.0375021	0.695506
***	L4	C	H4	C | L4	H4 | C						L4	C	H4	C | L4	H4 | C						L4	C	H4	C | L4	H4 | C
***	tbdgy	tbdgy	tbdgy	tbdgy - St	tbdgy - St						tbdgy	tbdgy	tbdgy	tbdgy - St	tbdgy - St						tbdgy	tbdgy	tbdgy	tbdgy - St	tbdgy - St
***	35.6067	1.93005	1.34132	0.0540096	0.723269	av	0.0540096	0.0390329	0.723269		26.5594	1.44926	1.00782	0.0543903	0.720261	av	0.0543903	0.0391403	0.720261		20.5559	1.11942	0.77873	0.0543392	0.716267	av	0.0543392	0.0389057	0.716267
***	4.53609	4.63564	4.63136	0.336385	1.69276	stabw	0.00140729	0.00488492	0.0948356		4.32612	4.39507	4.3904	0.487457	1.49684	stabw	0.00205369	0.00435883	0.0835102		4.57663	4.62306	4.61546	0.395587	1.30277	stabw	0.00166506	0.00389561	0.0722802
***	1.61515	0.08947	0.0621214	0.00018168	0.0122432	stabw/(n)^0.5	0.00018168	0.00063064	0.0122432		1.14899	0.0636962	0.0442473	0.00026513	0.0107811	stabw/(n)^0.5	0.00026513	0.000562723	0.0107811		0.940767	0.0517516	0.035942	0.000214959	0.00933133	stabw/(n)^0.5	0.000214959	0.000502921	0.00933133
***	35.1364	35.9075	35.8743	2.60562	13.1121	(stabw/(n)^0.5)/av /%	0.00336385	0.0161567	0.0169276		33.51	34.0441	34.0079	3.77583	11.5944	(stabw/(n)^0.5)/av /%	0.00487457	0.0143771	0.0149684		35.4504	35.81	35.7512	3.06421	10.0912	(stabw/(n)^0.5)/av /%	0.00395587	0.0129267	0.0130277
***	12.5109	0.693031	0.48119	0.00140729	0.0948356						8.90005	0.493389	0.342738	0.00205369	0.0835102						7.28715	0.400866	0.278405	0.00166506	0.0722802

## Sheet: scan speed wo outlier
	Laserablation - scan speed characterization
	solid samples		WASO04
	dissolved sample		WASO04 4 µg/g
	Neptune XT
	ESI NWR213
	without first ten data (outlier)
	WASO04 Laserablation scan speed 2 µm/s
	1st run						not blank corr				2nd run						not blank corr				3rd run						not blank corr
Cycle	27.94	28.925	29.916	28.925/27.94 (1)	29.916/28.925 (2)		29/28	30/28	30/29		27.94	28.925	29.916	28.925/27.94 (1)	29.916/28.925 (2)		29/28	30/28	30/29		27.94	28.925	29.916	28.925/27.94 (1)	29.916/28.925 (2)		29/28	30/28	30/29
11	18.3102	1.03087	0.717455	0.0563002	0.695971		0.0563002	0.0391833	0.695971		11.9677	0.644601	0.448807	0.0538617	0.696256		0.0538617	0.0375015	0.696256		12.2936	0.654711	0.455858	0.0532564	0.696274		0.0532564	0.0370811	0.696274
12	16.7897	0.935737	0.650602	0.0557328	0.695283		0.0557328	0.0387501	0.695283		10.4112	0.55444	0.38632	0.0532544	0.696774		0.0532544	0.0371063	0.696774		11.317	0.602884	0.420068	0.0532724	0.696764		0.0532724	0.0371183	0.696764
13	16.1722	0.866459	0.603025	0.0535771	0.695965		0.0535771	0.0372878	0.695965		12.6018	0.696266	0.48468	0.0552513	0.696114		0.0552513	0.0384612	0.696114		11.4844	0.61419	0.427748	0.0534804	0.696442		0.0534804	0.037246	0.696442
14	16.6324	0.918839	0.639482	0.0552439	0.695968		0.0552439	0.038448	0.695968		12.3364	0.745889	0.519021	0.0604626	0.695843		0.0604626	0.0420724	0.695843		11.6147	0.639379	0.445412	0.055049	0.696632		0.055049	0.0383489	0.696632
15	15.6807	0.835374	0.581502	0.0532742	0.696098		0.0532742	0.0370841	0.696098		12.551	0.796339	0.577869	0.0634481	0.725658		0.0634481	0.0460416	0.725658		12.086	0.659992	0.459346	0.0546081	0.695988		0.0546081	0.0380066	0.695988
16	15.4832	0.826776	0.575483	0.0533981	0.696057		0.0533981	0.0371681	0.696057		11.1651	0.594529	0.414248	0.0532486	0.696767		0.0532486	0.0371019	0.696767		11.4054	0.648703	0.451722	0.0568771	0.696346		0.0568771	0.0396061	0.696346
17	14.8495	0.800311	0.557143	0.053895	0.696158		0.053895	0.0375194	0.696158		12.312	0.658856	0.45868	0.0535134	0.696176		0.0535134	0.0372547	0.696176		10.8465	0.595847	0.414722	0.0549342	0.696021		0.0549342	0.0382354	0.696021
18	13.4691	0.717944	0.499766	0.0533029	0.696108		0.0533029	0.0371045	0.696108		11.6821	0.622225	0.433524	0.0532632	0.696732		0.0532632	0.0371102	0.696732		9.93698	0.529487	0.368988	0.0532845	0.696878		0.0532845	0.0371328	0.696878
19	13.2052	0.703196	0.489599	0.0532515	0.696249		0.0532515	0.0370763	0.696249		11.9596	0.637251	0.443863	0.0532838	0.696527		0.0532838	0.0371136	0.696527		10.7285	0.669079	0.465792	0.0623644	0.696169		0.0623644	0.0434162	0.696169
20	13.1107	0.698221	0.486168	0.0532558	0.696295		0.0532558	0.0370818	0.696295		11.6471	0.625566	0.435672	0.0537101	0.696443		0.0537101	0.037406	0.696443		9.69649	0.538606	0.374867	0.0555465	0.695995		0.0555465	0.0386601	0.695995
21	13.4965	0.718548	0.500408	0.0532396	0.696416		0.0532396	0.0370769	0.696416		11.0478	0.609261	0.424432	0.0551477	0.696634		0.0551477	0.0384178	0.696634		9.69334	0.516368	0.35991	0.0532704	0.697002		0.0532704	0.0371296	0.697002
22	12.7767	0.68031	0.473677	0.0532461	0.696266		0.0532461	0.0370734	0.696266		10.8932	0.587981	0.409436	0.0539769	0.696342		0.0539769	0.0375864	0.696342		9.84769	0.524694	0.365597	0.0532809	0.696781		0.0532809	0.0371252	0.696781
23	12.5186	0.668004	0.465158	0.0533611	0.69634		0.0533611	0.0371575	0.69634		10.1113	0.545011	0.379817	0.0539013	0.696897		0.0539013	0.0375636	0.696897		9.62852	0.512839	0.357306	0.0532625	0.696721		0.0532625	0.0371091	0.696721
24	13.6409	0.728615	0.507331	0.0534139	0.696294		0.0534139	0.0371918	0.696294		10.9295	0.586607	0.408473	0.0536719	0.696331		0.0536719	0.0373734	0.696331		25.6175	2.03023	1.41403	0.0792517	0.696486		0.0792517	0.0551977	0.696486
25	15.3853	0.819174	0.570182	0.053244	0.696045		0.053244	0.0370603	0.696045		10.4147	0.554545	0.386497	0.0532463	0.696962		0.0532463	0.0371107	0.696962		12.4759	0.71281	0.495984	0.0571348	0.695815		0.0571348	0.0397553	0.695815
26	14.043	0.750756	0.522805	0.0534613	0.696371		0.0534613	0.0372289	0.696371		10.028	0.534844	0.372706	0.0533348	0.69685		0.0533348	0.0371664	0.69685		11.05	0.589868	0.410837	0.0533815	0.69649		0.0533815	0.0371797	0.69649
27	13.3517	0.71177	0.495566	0.0533094	0.696246		0.0533094	0.0371164	0.696246		9.60819	0.511721	0.356442	0.0532589	0.696555		0.0532589	0.0370978	0.696555		10.6331	0.616471	0.429058	0.0579766	0.695991		0.0579766	0.0403512	0.695991
28	15.0126	0.801875	0.558131	0.0534136	0.696033		0.0534136	0.0371776	0.696033		9.89989	0.532561	0.371087	0.0537947	0.696797		0.0537947	0.037484	0.696797		10.4825	0.558558	0.388969	0.0532848	0.69638		0.0532848	0.0371064	0.69638
29	13.6308	0.726304	0.505535	0.0532839	0.696037		0.0532839	0.0370876	0.696037		10.3982	0.561313	0.390973	0.0539817	0.696533		0.0539817	0.0376	0.696533		9.89496	0.527671	0.367577	0.0533272	0.696602		0.0533272	0.0371479	0.696602
30	13.4822	0.719266	0.500919	0.0533492	0.696431		0.0533492	0.037154	0.696431		9.60539	0.512476	0.35699	0.053353	0.696598		0.053353	0.0371656	0.696598		9.96979	0.531115	0.370083	0.0532724	0.696804		0.0532724	0.0371204	0.696804
31	13.7875	0.734254	0.511321	0.053255	0.696382		0.053255	0.0370858	0.696382		9.33944	0.497479	0.346623	0.0532665	0.696759		0.0532665	0.0371139	0.696759		10.5187	0.580346	0.404116	0.0551727	0.696337		0.0551727	0.0384188	0.696337
32	15.1197	0.805035	0.560267	0.0532442	0.695954		0.0532442	0.0370555	0.695954		10.4578	0.564977	0.39358	0.0540247	0.69663		0.0540247	0.0376352	0.69663		10.4711	0.578601	0.402929	0.055257	0.696385		0.055257	0.0384801	0.696385
33	13.2737	0.764851	0.532158	0.0576215	0.695767		0.0576215	0.0400911	0.695767		10.1823	0.544174	0.379075	0.0534433	0.696606		0.0534433	0.0372289	0.696606		9.96792	0.531187	0.370127	0.0532896	0.696793		0.0532896	0.0371319	0.696793
34	14.0143	0.747359	0.520366	0.0533285	0.696273		0.0533285	0.0371312	0.696273		16.3564	1.17567	0.816961	0.071878	0.694891		0.071878	0.0499474	0.694891		10.8291	0.576995	0.401914	0.053282	0.696565		0.053282	0.0371143	0.696565
35	13.8869	0.739994	0.515085	0.0532873	0.696067		0.0532873	0.0370915	0.696067		10.0495	0.535566	0.373046	0.053293	0.696545		0.053293	0.037121	0.696545		10.3867	0.606574	0.42216	0.0583991	0.695975		0.0583991	0.0406444	0.695975
36	12.9015	0.687133	0.478509	0.05326	0.696385		0.05326	0.0370895	0.696385		8.95992	0.477423	0.332687	0.0532843	0.696839		0.0532843	0.0371305	0.696839		9.64954	0.514381	0.358384	0.0533063	0.696729		0.0533063	0.03714	0.696729
37	11.7939	0.628204	0.43743	0.0532654	0.696317		0.0532654	0.0370896	0.696317		9.94834	0.536973	0.374041	0.0539762	0.696573		0.0539762	0.0375984	0.696573		9.69479	0.516275	0.359746	0.0532529	0.696811		0.0532529	0.0371072	0.696811
38	11.5596	0.692108	0.481466	0.059873	0.695652		0.059873	0.0416508	0.695652		9.41957	0.521131	0.362878	0.0553243	0.696329		0.0553243	0.0385239	0.696329		9.39777	0.502056	0.349807	0.0534229	0.696748		0.0534229	0.0372223	0.696748
39	13.6304	0.841446	0.585021	0.0617329	0.695257		0.0617329	0.0429202	0.695257		10.3777	0.650476	0.452386	0.0626804	0.695469		0.0626804	0.0435923	0.695469		8.88957	0.473588	0.330123	0.0532746	0.697068		0.0532746	0.037136	0.697068
40	13.0788	0.735656	0.512165	0.0562482	0.696202		0.0562482	0.0391601	0.696202		11.0075	0.719562	0.500059	0.0653703	0.694949		0.0653703	0.045429	0.694949		9.90935	0.52894	0.368435	0.0533779	0.696554		0.0533779	0.0371806	0.696554
41	13.4035	0.739642	0.514452	0.0551828	0.695542		0.0551828	0.038382	0.695542		9.69179	0.516129	0.359524	0.0532542	0.696579		0.0532542	0.0370958	0.696579		9.56159	0.650069	0.452787	0.0679875	0.696521		0.0679875	0.0473547	0.696521
42	11.5014	0.612762	0.426829	0.0532773	0.696566		0.0532773	0.0371112	0.696566		9.81962	0.638648	0.445755	0.065038	0.697966		0.065038	0.0453943	0.697966		9.16613	0.488666	0.340647	0.0533121	0.697096		0.0533121	0.0371637	0.697096
43	11.0615	0.628757	0.437703	0.0568419	0.696141		0.0568419	0.03957	0.696141		9.08605	0.508551	0.3541	0.0559706	0.696292		0.0559706	0.0389718	0.696292		9.19186	0.48952	0.341249	0.0532558	0.69711		0.0532558	0.0371252	0.69711
44	11.1241	0.592882	0.412893	0.0532972	0.696417		0.0532972	0.0371171	0.696417		9.34822	0.533303	0.371273	0.0570486	0.696177		0.0570486	0.0397159	0.696177		10.6601	0.644025	0.448343	0.0604147	0.696159		0.0604147	0.0420582	0.696159
45	10.8844	0.579806	0.403807	0.0532696	0.696451		0.0532696	0.0370997	0.696451		9.95412	0.550071	0.383136	0.0552607	0.69652		0.0552607	0.0384901	0.69652		9.10965	0.485261	0.338193	0.0532689	0.69693		0.0532689	0.0371247	0.69693
46	11.6347	0.693364	0.483877	0.0595944	0.697868		0.0595944	0.0415891	0.697868		8.84383	0.470985	0.328146	0.0532558	0.696722		0.0532558	0.0371045	0.696722		9.88505	0.528297	0.368067	0.0534441	0.696703		0.0534441	0.0372347	0.696703
47	11.0663	0.620491	0.432231	0.0560703	0.696594		0.0560703	0.0390583	0.696594		8.99117	0.487112	0.339661	0.0541767	0.697295		0.0541767	0.0377771	0.697295		9.66792	0.516778	0.360048	0.0534529	0.696717		0.0534529	0.0372415	0.696717
48	11.0324	0.603871	0.420505	0.0547361	0.696348		0.0547361	0.0381154	0.696348		8.71043	0.465013	0.324034	0.0533857	0.696828		0.0533857	0.0372007	0.696828		10.4107	0.554323	0.386026	0.0532454	0.696392		0.0532454	0.0370797	0.696392
49	11.3256	0.629565	0.438149	0.0555877	0.695955		0.0555877	0.0386866	0.695955		8.8215	0.469734	0.327258	0.0532487	0.696689		0.0532487	0.0370978	0.696689		9.44636	0.503216	0.350584	0.0532708	0.696688		0.0532708	0.0371131	0.696688
50	11.5688	0.757088	0.542519	0.0654424	0.716586		0.0654424	0.0468951	0.716586		8.81531	0.469527	0.327127	0.0532627	0.696716		0.0532627	0.037109	0.696716		9.59196	0.510798	0.355824	0.0532527	0.696605		0.0532527	0.0370961	0.696605
51	10.7636	0.574015	0.399752	0.0533295	0.696414		0.0533295	0.0371394	0.696414		8.82907	0.470065	0.327538	0.0532406	0.696792		0.0532406	0.0370977	0.696792		10.4837	0.559114	0.389451	0.0533319	0.69655		0.0533319	0.0371484	0.69655
52	11.2393	0.598362	0.416838	0.0532381	0.696633		0.0532381	0.0370874	0.696633		8.49836	0.467084	0.32546	0.0549617	0.696791		0.0549617	0.0382968	0.696791		9.50436	0.506186	0.352627	0.0532582	0.696636		0.0532582	0.0371016	0.696636
53	10.668	0.604506	0.421002	0.0566653	0.69644		0.0566653	0.0394639	0.69644		8.86838	0.535079	0.372879	0.0603356	0.696867		0.0603356	0.0420459	0.696867		10.3862	0.596865	0.415463	0.0574669	0.696075		0.0574669	0.0400013	0.696075
54	11.4311	0.665688	0.463011	0.0582348	0.695538		0.0582348	0.0405045	0.695538		9.13931	0.48691	0.339257	0.0532764	0.696755		0.0532764	0.0371206	0.696755		8.64615	0.460474	0.320916	0.0532577	0.696927		0.0532577	0.0371167	0.696927
55	11.0469	0.588477	0.409956	0.0532706	0.696638		0.0532706	0.0371103	0.696638		8.52737	0.454228	0.316523	0.053267	0.696838		0.053267	0.0371185	0.696838		10.0328	0.557385	0.388234	0.0555564	0.696526		0.0555564	0.0386965	0.696526
56	11.3277	0.603225	0.420247	0.0532522	0.696667		0.0532522	0.0370991	0.696667		8.36852	0.445807	0.310643	0.0532719	0.69681		0.0532719	0.0371204	0.69681		9.69801	0.538378	0.375015	0.0555143	0.696564		0.0555143	0.0386693	0.696564
57	11.8322	0.693354	0.482402	0.0585991	0.695751		0.0585991	0.0407704	0.695751		8.72351	0.469005	0.326897	0.0537633	0.697001		0.0537633	0.0374731	0.697001		10.5966	0.587178	0.408863	0.0554119	0.696319		0.0554119	0.0385843	0.696319
58	11.5886	0.617209	0.429875	0.0532602	0.696482		0.0532602	0.0370947	0.696482		8.3856	0.447205	0.3117	0.0533302	0.696996		0.0533302	0.0371709	0.696996		9.89271	0.528362	0.367985	0.0534092	0.696463		0.0534092	0.0371976	0.696463
59	11.4462	0.6111	0.425785	0.0533891	0.696752		0.0533891	0.0371989	0.696752		8.61234	0.458726	0.319629	0.0532638	0.696775		0.0532638	0.0371129	0.696775		10.3765	0.552639	0.384876	0.0532586	0.696432		0.0532586	0.037091	0.696432
60	11.1056	0.592441	0.412514	0.053346	0.696296		0.053346	0.0371446	0.696296		9.19689	0.573455	0.399343	0.0623531	0.69638		0.0623531	0.0434215	0.69638		10.8934	0.580132	0.403896	0.0532552	0.696214		0.0532552	0.037077	0.696214
***	L4	C	H4	C | L4	H4 | C						L4	C	H4	C | L4	H4 | C						L4	C	H4	C | L4	H4 | C
***	tbdgy	tbdgy	tbdgy	tbdgy - St	tbdgy - St						tbdgy	tbdgy	tbdgy	tbdgy - St	tbdgy - St						tbdgy	tbdgy	tbdgy	tbdgy - St	tbdgy - St
***	12.6413	0.690565	0.481067	0.054564	0.720261	av	0.0547911	0.0381726	0.696619		9.55519	0.5299	0.36955	0.0550494	0.720115	av	0.0554494	0.0386598	0.697143		10.1562	0.564686	0.393368	0.0548739	0.718729	av	0.0552155	0.0384585	0.696523
***	5.58678	5.5509	5.53606	0.578281	1.41942	stabw	0.00260156	0.00192343	0.00291053		5.09138	5.35816	5.35315	0.897173	1.37242	stabw	0.00407753	0.00290857	0.00414467		5.65977	6.59705	6.58562	0.969201	1.3332	stabw	0.00443938	0.00308668	0.000319088
***	0.706239	0.0383326	0.0266322	0.000315533	0.0102235	stabw/(n)^0.5	0.000367916	0.000272014	0.000411611		0.486491	0.0283929	0.0197826	0.000493888	0.00988302	stabw/(n)^0.5	0.000576649	0.000411334	0.000586145		0.574819	0.0372526	0.0259057	0.000531838	0.00958211	stabw/(n)^0.5	0.000627823	0.000436522	4.51259e-05
***	43.275	42.9971	42.8822	4.47934	10.9948	(stabw/(n)^0.5)/av /%	0.00671489	0.00712589	0.00059087		39.4376	41.5042	41.4653	6.94947	10.6307	(stabw/(n)^0.5)/av /%	0.0103996	0.0106398	0.000840781		43.8404	51.1005	51.012	7.5074	10.3269	(stabw/(n)^0.5)/av /%	0.0113704	0.0113505	6.47873e-05
***	5.47051	0.296923	0.206292	0.00244411	0.0791913						3.76834	0.219931	0.153235	0.00382564	0.0765536						4.45253	0.288557	0.200665	0.0041196	0.0742227
	11.4466	0.628514	0.437263	0.00104151	0.0839318
	WASO04 Laserablation scan speed 4 µm/s
	1st run						not blank corr				2nd run						not blank corr				3rd run						not blank corr
Cycle	27.94	28.925	29.916	28.925/27.94 (1)	29.916/28.925 (2)		29/28	30/28	30/29		27.94	28.925	29.916	28.925/27.94 (1)	29.916/28.925 (2)		29/28	30/28	30/29		27.94	28.925	29.916	28.925/27.94 (1)	29.916/28.925 (2)		29/28	30/28	30/29
11	17.1088	0.911753	0.634566	0.0532915	0.695984		0.0532915	0.03709	0.695984		26.6525	1.43581	0.998359	0.0538715	0.695328		0.0538715	0.0374584	0.695328		23.0468	1.24288	0.864563	0.0539286	0.695612		0.0539286	0.0375134	0.695612
12	16.1121	0.858282	0.597351	0.0532693	0.695984		0.0532693	0.0370746	0.695984		24.2832	1.32843	0.924092	0.0547056	0.695627		0.0547056	0.0380547	0.695627		21.2042	1.135	0.789268	0.0535274	0.695388		0.0535274	0.0372223	0.695388
13	16.8149	0.895302	0.623159	0.0532447	0.696032		0.0532447	0.03706	0.696032		22.6799	1.20784	0.839948	0.053256	0.695413		0.053256	0.0370349	0.695413		21.2971	1.17611	0.818143	0.0552243	0.695632		0.0552243	0.0384158	0.695632
14	17.4746	0.931238	0.648109	0.0532909	0.695965		0.0532909	0.0370886	0.695965		21.0587	1.16562	0.810728	0.0553507	0.695536		0.0553507	0.0384984	0.695536		22.8845	1.23722	0.860569	0.0540638	0.695566		0.0540638	0.0376049	0.695566
15	16.0239	0.853386	0.593951	0.0532571	0.695993		0.0532571	0.0370666	0.695993		20.3002	1.08188	0.752529	0.053294	0.695577		0.053294	0.03707	0.695577		24.1664	1.35188	0.939887	0.0559403	0.695246		0.0559403	0.0388923	0.695246
16	18.1111	0.996869	0.693504	0.055042	0.695683		0.055042	0.0382918	0.695683		19.786	1.05365	0.732912	0.0532524	0.695591		0.0532524	0.0370419	0.695591		21.8841	1.16646	0.811356	0.0533018	0.695569		0.0533018	0.0370751	0.695569
17	18.6222	0.991943	0.690042	0.0532668	0.695647		0.0532668	0.0370549	0.695647		18.8125	1.02356	0.712102	0.0544085	0.69571		0.0544085	0.0378525	0.69571		21.6278	1.18983	0.82738	0.0550139	0.695377		0.0550139	0.0382554	0.695377
18	19.4596	1.09115	0.758836	0.0560726	0.695445		0.0560726	0.0389954	0.695445		18.5879	1.09572	0.76154	0.0589481	0.695011		0.0589481	0.0409696	0.695011		19.6924	1.08119	0.751758	0.0549038	0.695306		0.0549038	0.038175	0.695306
19	18.0758	0.963019	0.670002	0.0532768	0.695731		0.0532768	0.0370663	0.695731		17.9893	1.01761	0.707594	0.0565676	0.69535		0.0565676	0.0393342	0.69535		19.4561	1.0641	0.740301	0.0546923	0.695706		0.0546923	0.0380497	0.695706
20	17.2771	0.92064	0.640613	0.0532868	0.695835		0.0532868	0.0370788	0.695835		16.8885	0.899423	0.625859	0.0532564	0.695845		0.0532564	0.0370582	0.695845		21.2252	1.20111	0.834902	0.0565888	0.69511		0.0565888	0.0393354	0.69511
21	16.5516	0.881702	0.61362	0.05327	0.695949		0.05327	0.0370732	0.695949		16.6503	0.887212	0.617252	0.0532851	0.695721		0.0532851	0.0370716	0.695721		21.0426	1.19551	0.83112	0.0568139	0.6952		0.0568139	0.039497	0.6952
22	15.2463	0.814278	0.566749	0.0534083	0.696014		0.0534083	0.0371729	0.696014		16.4735	0.877144	0.610195	0.0532458	0.695661		0.0532458	0.037041	0.695661		19.2867	1.02704	0.714481	0.0532514	0.695669		0.0532514	0.0370453	0.695669
23	15.5825	0.830604	0.57808	0.0533036	0.695975		0.0533036	0.037098	0.695975		18.324	1.22019	0.848836	0.0665896	0.695659		0.0665896	0.0463236	0.695659		20.6086	1.14246	0.79431	0.0554359	0.695264		0.0554359	0.0385426	0.695264
24	20.5853	1.37143	0.954642	0.0666219	0.696091		0.0666219	0.0463749	0.696091		15.5439	0.828167	0.576219	0.0532791	0.695777		0.0532791	0.0370703	0.695777		20.8145	1.11954	0.778663	0.0537868	0.695518		0.0537868	0.0374097	0.695518
25	17.5505	0.935489	0.650825	0.0533026	0.695706		0.0533026	0.0370829	0.695706		17.0666	0.969157	0.673947	0.0567866	0.695396		0.0567866	0.0394891	0.695396		18.6498	0.993849	0.691193	0.0532899	0.695471		0.0532899	0.0370616	0.695471
26	16.2191	1.00577	0.703854	0.0620115	0.699818		0.0620115	0.0433967	0.699818		16.92	0.901881	0.627615	0.0533027	0.695895		0.0533027	0.0370931	0.695895		17.2603	0.919105	0.639649	0.0532496	0.695948		0.0532496	0.037059	0.695948
27	16.2772	0.883779	0.614969	0.0542956	0.69584		0.0542956	0.037781	0.69584		17.7129	0.943396	0.656477	0.0532604	0.695866		0.0532604	0.0370621	0.695866		18.7538	1.01054	0.703051	0.0538844	0.695722		0.0538844	0.0374885	0.695722
28	16.4766	0.878329	0.611007	0.0533077	0.695647		0.0533077	0.0370833	0.695647		17.5574	0.939511	0.6537	0.0535109	0.695787		0.0535109	0.0372322	0.695787		18.473	0.983964	0.684269	0.0532651	0.69542		0.0532651	0.0370416	0.69542
29	16.7045	0.889461	0.61901	0.0532468	0.695938		0.0532468	0.0370565	0.695938		17.6723	0.953295	0.663208	0.053943	0.6957		0.053943	0.0375281	0.6957		18.4061	0.980077	0.681789	0.0532475	0.695648		0.0532475	0.0370415	0.695648
30	16.2111	0.863462	0.600624	0.0532638	0.6956		0.0532638	0.0370503	0.6956		17.8957	0.953512	0.663387	0.0532816	0.695731		0.0532816	0.0370696	0.695731		16.7686	0.892672	0.621197	0.0532347	0.695885		0.0532347	0.0370452	0.695885
31	16.5716	0.895136	0.622841	0.0540163	0.695806		0.0540163	0.0375849	0.695806		17.2956	0.949141	0.660314	0.0548775	0.695696		0.0548775	0.0381781	0.695696		17.8762	0.952127	0.662389	0.0532623	0.695694		0.0532623	0.0370542	0.695694
32	17.3195	0.940833	0.654558	0.0543222	0.695721		0.0543222	0.0377931	0.695721		17.6805	0.942447	0.655693	0.0533042	0.695734		0.0533042	0.0370856	0.695734		18.3597	0.978589	0.680919	0.0533009	0.695817		0.0533009	0.0370877	0.695817
33	16.1154	0.861529	0.599282	0.05346	0.695603		0.05346	0.0371869	0.695603		16.6595	0.891137	0.620098	0.0534912	0.695851		0.0534912	0.0372219	0.695851		18.6166	0.991936	0.68995	0.0532822	0.695559		0.0532822	0.0370609	0.695559
34	16.2269	0.864427	0.601488	0.0532713	0.695822		0.0532713	0.0370673	0.695822		15.4589	0.823353	0.572799	0.0532608	0.695691		0.0532608	0.037053	0.695691		17.6716	0.942508	0.655677	0.0533346	0.695673		0.0533346	0.0371034	0.695673
35	16.224	0.864811	0.601718	0.0533044	0.69578		0.0533044	0.0370881	0.69578		16.3605	0.881626	0.613321	0.0538874	0.695671		0.0538874	0.0374879	0.695671		17.2783	0.923652	0.642744	0.0534573	0.695872		0.0534573	0.0371994	0.695872
36	17.0055	0.905728	0.630162	0.0532608	0.695752		0.0532608	0.0370563	0.695752		15.3695	0.828763	0.57698	0.0539226	0.696195		0.0539226	0.0375406	0.696195		17.9217	1.0088	0.701452	0.0562893	0.695335		0.0562893	0.0391399	0.695335
37	16.9735	0.957075	0.665419	0.0563863	0.695263		0.0563863	0.0392033	0.695263		16.1008	0.896723	0.623584	0.0556945	0.695403		0.0556945	0.0387301	0.695403		17.6954	0.942408	0.655559	0.0532571	0.695622		0.0532571	0.0370468	0.695622
38	16.0191	0.853173	0.593664	0.0532596	0.695831		0.0532596	0.0370597	0.695831		15.0547	0.802477	0.558532	0.0533042	0.69601		0.0533042	0.0371002	0.69601		17.1041	0.911036	0.633819	0.0532642	0.695712		0.0532642	0.0370565	0.695712
39	16.6889	0.888749	0.618288	0.0532539	0.695684		0.0532539	0.0370479	0.695684		14.7895	0.787868	0.548332	0.0532722	0.69597		0.0532722	0.0370758	0.69597		17.6522	0.939823	0.653925	0.0532411	0.695795		0.0532411	0.0370449	0.695795
40	17.3165	0.992214	0.691832	0.0572988	0.697261		0.0572988	0.0399522	0.697261		14.0949	0.75045	0.522177	0.0532426	0.695818		0.0532426	0.0370472	0.695818		17.7388	0.950044	0.660922	0.0535575	0.695675		0.0535575	0.0372586	0.695675
41	16.1604	0.862353	0.599721	0.0533622	0.695447		0.0533622	0.0371106	0.695447		14.6035	0.798881	0.555686	0.0547047	0.695581		0.0547047	0.0380515	0.695581		17.2806	0.92048	0.640392	0.0532667	0.695716		0.0532667	0.0370585	0.695716
42	15.586	0.831386	0.578551	0.053342	0.695887		0.053342	0.03712	0.695887		15.4043	0.853788	0.59393	0.0554254	0.695641		0.0554254	0.0385562	0.695641		16.712	0.921654	0.640995	0.0551493	0.695483		0.0551493	0.0383554	0.695483
43	15.1338	0.875373	0.608767	0.0578422	0.695437		0.0578422	0.0402256	0.695437		14.4371	0.77054	0.536312	0.0533721	0.696021		0.0533721	0.0371481	0.696021		16.4859	0.880311	0.612298	0.053398	0.695547		0.053398	0.0371408	0.695547
44	15.3077	0.834516	0.58056	0.0545162	0.695684		0.0545162	0.037926	0.695684		15.7895	0.842174	0.586024	0.0533377	0.695847		0.0533377	0.0371149	0.695847		15.7908	0.841696	0.585582	0.053303	0.695717		0.053303	0.0370838	0.695717
45	15.833	0.843364	0.586868	0.0532664	0.695865		0.0532664	0.0370662	0.695865		15.3912	0.831033	0.578364	0.053994	0.695959		0.053994	0.0375776	0.695959		16.3963	0.873801	0.60813	0.0532925	0.695959		0.0532925	0.0370894	0.695959
46	16.9088	0.900441	0.626415	0.0532528	0.695675		0.0532528	0.0370467	0.695675		15.8197	0.921305	0.640608	0.058238	0.695327		0.058238	0.0404944	0.695327		17.4093	0.9268	0.6449	0.053236	0.695835		0.053236	0.0370435	0.695835
47	17.553	0.934467	0.650255	0.0532369	0.695857		0.0532369	0.0370453	0.695857		16.6285	0.960545	0.667927	0.0577649	0.695362		0.0577649	0.0401675	0.695362		18.4094	0.986184	0.68604	0.0535697	0.695651		0.0535697	0.0372658	0.695651
48	18.0362	1.05584	0.733939	0.0585405	0.69512		0.0585405	0.0406927	0.69512		15.5352	0.827269	0.575684	0.0532511	0.695886		0.0532511	0.0370567	0.695886		16.9961	0.908923	0.631999	0.0534783	0.695328		0.0534783	0.0371849	0.695328
49	18.4303	1.02876	0.715476	0.055819	0.695476		0.055819	0.0388208	0.695476		15.257	0.812598	0.56544	0.0532608	0.695843		0.0532608	0.0370611	0.695843		17.6184	0.938357	0.652857	0.0532601	0.695745		0.0532601	0.0370555	0.695745
50	18.3263	0.97637	0.679082	0.0532771	0.695517		0.0532771	0.0370551	0.695517		15.2882	0.814515	0.566929	0.0532775	0.696033		0.0532775	0.0370829	0.696033		17.4806	0.930724	0.647561	0.0532432	0.69576		0.0532432	0.0370445	0.69576
51	18.2764	0.974578	0.677979	0.0533244	0.695664		0.0533244	0.0370959	0.695664		15.9562	0.868319	0.604101	0.0544191	0.695714		0.0544191	0.0378601	0.695714		17.8446	0.950129	0.661083	0.0532447	0.695783		0.0532447	0.0370467	0.695783
52	18.2444	0.972168	0.676225	0.0532859	0.695584		0.0532859	0.0370649	0.695584		16.8485	0.896885	0.624143	0.0532324	0.695901		0.0532324	0.0370445	0.695901		19.7453	1.05146	0.73128	0.053251	0.695492		0.053251	0.0370356	0.695492
53	20.2473	1.14335	0.796501	0.0564694	0.696637		0.0564694	0.0393387	0.696637		16.3381	0.873322	0.607637	0.053453	0.695776		0.053453	0.0371913	0.695776		17.8569	0.950798	0.661237	0.0532454	0.695455		0.0532454	0.0370298	0.695455
54	19.8244	1.20253	0.83635	0.0606588	0.695494		0.0606588	0.0421878	0.695494		15.8219	0.868949	0.60444	0.0549207	0.695599		0.0549207	0.0382028	0.695599		17.8479	0.950653	0.66133	0.0532641	0.695659		0.0532641	0.0370537	0.695659
55	16.415	0.874265	0.60819	0.0532602	0.695659		0.0532602	0.037051	0.695659		14.1271	0.752285	0.523723	0.0532512	0.696177		0.0532512	0.0370723	0.696177		18.423	0.981148	0.682106	0.0532567	0.695212		0.0532567	0.0370247	0.695212
56	15.6981	0.88507	0.615386	0.0563805	0.695296		0.0563805	0.0392012	0.695296		13.641	0.726243	0.505518	0.0532396	0.696072		0.0532396	0.0370586	0.696072		18.7748	1.04524	0.726723	0.0556725	0.695269		0.0556725	0.0387074	0.695269
57	15.0527	0.80501	0.560027	0.0534794	0.695678		0.0534794	0.0372044	0.695678		14.3559	0.764243	0.531965	0.0532356	0.696068		0.0532356	0.0370556	0.696068		18.4557	0.984098	0.684226	0.0533221	0.695282		0.0533221	0.0370739	0.695282
58	16.4711	0.884563	0.615364	0.0537039	0.695671		0.0537039	0.0373602	0.695671		14.5497	0.787878	0.548206	0.0541506	0.695801		0.0541506	0.0376781	0.695801		16.186	0.862769	0.600238	0.0533034	0.695711		0.0533034	0.0370838	0.695711
59	18.864	1.05736	0.735112	0.0560519	0.695231		0.0560519	0.038969	0.695231		13.4212	0.723775	0.503743	0.0539278	0.695995		0.0539278	0.0375335	0.695995		16.4001	0.875747	0.609121	0.053399	0.695545		0.053399	0.0371414	0.695545
60	18.0131	0.961697	0.668988	0.0533888	0.695633		0.0533888	0.037139	0.695633		13.6769	0.734092	0.510756	0.0536736	0.695765		0.0536736	0.0373443	0.695765		14.7773	0.787607	0.548001	0.0532984	0.695781		0.0532984	0.037084	0.695781
***	L4	C	H4	C | L4	H4 | C						L4	C	H4	C | L4	H4 | C						L4	C	H4	C | L4	H4 | C
***	tbdgy	tbdgy	tbdgy	tbdgy - St	tbdgy - St						tbdgy	tbdgy	tbdgy	tbdgy - St	tbdgy - St						tbdgy	tbdgy	tbdgy	tbdgy - St	tbdgy - St
***	15.8666	0.868677	0.604558	0.0545898	0.720075	av	0.0546324	0.038016	0.695838		15.7857	0.857664	0.596794	0.0541907	0.719122	av	0.0543956	0.0378445	0.695732		17.3078	0.932816	0.648945	0.0537871	0.717014	av	0.0538669	0.0374685	0.695579
***	4.56403	4.69817	4.68981	0.628264	1.44977	stabw	0.00263738	0.00185014	0.000664723		4.97966	5.00604	4.99668	0.499076	1.39836	stabw	0.00223609	0.00154907	0.000241235		4.60062	4.64166	4.6338	0.232258	1.28679	stabw	0.00100643	0.000692673	0.000211139
***	0.724157	0.0408119	0.0283527	0.000342968	0.0104394	stabw/(n)^0.5	0.000372982	0.000261649	9.40061e-05		0.786074	0.042935	0.0298199	0.000270453	0.0100559	stabw/(n)^0.5	0.000316231	0.000219072	3.41158e-05		0.796268	0.0432981	0.0300708	0.000124925	0.00922648	stabw/(n)^0.5	0.000142331	9.79587e-05	2.98596e-05
***	35.3528	36.3919	36.3271	4.86651	11.2299	(stabw/(n)^0.5)/av /%	0.00682711	0.00688261	0.000135098		38.5723	38.7766	38.7041	3.86582	10.8317	(stabw/(n)^0.5)/av /%	0.00581354	0.00578874	4.90358e-05		35.6363	35.9541	35.8933	1.79906	9.96745	(stabw/(n)^0.5)/av /%	0.00264227	0.00261443	4.29277e-05
***	5.60929	0.316128	0.219619	0.00265662	0.0808635						6.0889	0.332573	0.230984	0.00209492	0.077893						6.16786	0.335386	0.232928	0.000967663	0.071468
	WASO04 Laserablation scan speed 6 µm/s
	1st run						not blank corr				2nd run						not blank corr				3rd run						not blank corr
Cycle	27.94	28.925	29.916	28.925/27.94 (1)	29.916/28.925 (2)		29/28	30/28	30/29		27.94	28.925	29.916	28.925/27.94 (1)	29.916/28.925 (2)		29/28	30/28	30/29		27.94	28.925	29.916	28.925/27.94 (1)	29.916/28.925 (2)		29/28	30/28	30/29
11	43.169	2.32816	1.61775	0.0539312	0.694861		0.0539312	0.0374747	0.694861		33.2864	1.86859	1.29895	0.0561368	0.69515		0.0561368	0.0390235	0.69515		27.5769	1.4786	1.02859	0.0536172	0.695656		0.0536172	0.0372991	0.695656
12	40.6931	2.19498	1.52541	0.0539398	0.694954		0.0539398	0.0374857	0.694954		29.1392	1.559	1.08363	0.0535018	0.695085		0.0535018	0.0371883	0.695085		25.4784	1.36531	0.949444	0.053587	0.695405		0.053587	0.0372647	0.695405
13	43.9575	2.36409	1.64344	0.0537813	0.695169		0.0537813	0.0373871	0.695169		29.4353	1.6001	1.11236	0.05436	0.695178		0.05436	0.0377899	0.695178		28.7707	1.53749	1.06933	0.0534394	0.695504		0.0534394	0.0371674	0.695504
14	44.4972	2.39203	1.66214	0.0537569	0.694864		0.0537569	0.0373537	0.694864		26.0877	1.40013	0.973781	0.0536701	0.695494		0.0536701	0.0373272	0.695494		30.3	1.74814	1.21504	0.0576945	0.695044		0.0576945	0.0401002	0.695044
15	38.9142	2.13361	1.48263	0.0548286	0.694891		0.0548286	0.0380999	0.694891		27.1251	1.45849	1.01379	0.0537691	0.695094		0.0537691	0.0373746	0.695094		29.5438	1.57893	1.09801	0.0534436	0.695412		0.0534436	0.0371653	0.695412
16	47.4877	2.61013	1.81377	0.0549644	0.694896		0.0549644	0.0381945	0.694896		28.8178	1.53795	1.06939	0.0533682	0.695332		0.0533682	0.0371086	0.695332		27.773	1.48117	1.02983	0.0533313	0.695284		0.0533313	0.0370804	0.695284
17	45.1394	2.41318	1.67706	0.0534606	0.694959		0.0534606	0.0371529	0.694959		29.5338	1.5771	1.09651	0.0533999	0.695266		0.0533999	0.0371271	0.695266		28.7239	1.54273	1.07253	0.0537091	0.695213		0.0537091	0.0373392	0.695213
18	45.8116	2.5017	1.7383	0.0546084	0.694847		0.0546084	0.0379445	0.694847		30.4956	1.62655	1.1309	0.0533373	0.695275		0.0533373	0.0370841	0.695275		26.2348	1.46781	1.0211	0.0559491	0.695657		0.0559491	0.0389214	0.695657
19	46.9704	2.51727	1.74908	0.0535927	0.694833		0.0535927	0.037238	0.694833		30.4233	1.6254	1.13024	0.053426	0.695363		0.053426	0.0371505	0.695363		27.5376	1.59327	1.10747	0.057858	0.695094		0.057858	0.0402168	0.695094
20	47.1296	2.54036	1.76497	0.0539015	0.694772		0.0539015	0.0374493	0.694772		30.4684	1.62696	1.13108	0.0533983	0.695212		0.0533983	0.0371231	0.695212		26.1382	1.3936	0.969136	0.0533165	0.695421		0.0533165	0.0370774	0.695421
21	43.8079	2.35748	1.63832	0.053814	0.694947		0.053814	0.0373979	0.694947		33.7208	1.82255	1.26689	0.0540483	0.695119		0.0540483	0.0375701	0.695119		25.9003	1.47066	1.0222	0.0567814	0.69506		0.0567814	0.0394665	0.69506
22	46.1724	2.46736	1.7146	0.0534381	0.694912		0.0534381	0.0371347	0.694912		34.1171	1.88104	1.30705	0.0551348	0.694858		0.0551348	0.0383108	0.694858		21.7819	1.16305	0.808854	0.0533951	0.695461		0.0533951	0.0371342	0.695461
23	45.2598	2.41852	1.68041	0.0534364	0.694807		0.0534364	0.037128	0.694807		32.6948	1.78198	1.23875	0.0545035	0.695156		0.0545035	0.0378884	0.695156		21.4085	1.14648	0.797506	0.0535526	0.695613		0.0535526	0.0372519	0.695613
24	46.6528	2.50378	1.73964	0.0536685	0.694804		0.0536685	0.0372891	0.694804		32.1565	1.71416	1.19146	0.0533067	0.695072		0.0533067	0.037052	0.695072		22.3644	1.22483	0.852242	0.0547668	0.695806		0.0547668	0.0381071	0.695806
25	43.5326	2.32294	1.61413	0.0533609	0.694866		0.0533609	0.0370787	0.694866		33.9866	1.81052	1.25851	0.0532716	0.695109		0.0532716	0.0370296	0.695109		21.8434	1.26209	0.876862	0.0577789	0.694769		0.0577789	0.040143	0.694769
26	40.4431	2.18936	1.52126	0.0541345	0.694843		0.0541345	0.037615	0.694843		34.2983	1.84315	1.28138	0.0537387	0.695211		0.0537387	0.0373597	0.695211		21.1055	1.12409	0.781862	0.0532606	0.695549		0.0532606	0.0370453	0.695549
27	36.8473	2.02587	1.4075	0.0549802	0.694765		0.0549802	0.0381983	0.694765		34.5398	1.84939	1.28524	0.0535439	0.694954		0.0535439	0.0372105	0.694954		22.8467	1.22176	0.849736	0.0534762	0.695504		0.0534762	0.0371929	0.695504
28	39.1189	2.1144	1.46922	0.0540507	0.694861		0.0540507	0.0375577	0.694861		29.6225	1.66236	1.15868	0.0561183	0.697009		0.0561183	0.0391149	0.697009		21.0771	1.12312	0.781262	0.0532863	0.695617		0.0532863	0.0370669	0.695617
29	36.6512	1.95809	1.36073	0.0534251	0.694928		0.0534251	0.0371266	0.694928		31.2574	1.83057	1.27555	0.0585643	0.696803		0.0585643	0.0408078	0.696803		22.7659	1.21503	0.845367	0.0533705	0.69576		0.0533705	0.0371331	0.69576
30	43.4022	2.33714	1.62395	0.0538484	0.694844		0.0538484	0.0374162	0.694844		28.1063	1.5412	1.07139	0.0548347	0.695163		0.0548347	0.0381191	0.695163		23.3775	1.38937	0.965589	0.0594317	0.694986		0.0594317	0.0413042	0.694986
31	44.4084	2.39598	1.66415	0.0539533	0.69456		0.0539533	0.0374738	0.69456		27.5553	1.46867	1.02079	0.0532989	0.695042		0.0532989	0.037045	0.695042		20.2581	1.08059	0.751358	0.0533412	0.695321		0.0533412	0.0370892	0.695321
32	38.1346	2.03242	1.4118	0.053296	0.694641		0.053296	0.0370216	0.694641		28.4742	1.5167	1.05468	0.0532659	0.695379		0.0532659	0.03704	0.695379		19.3049	1.0693	0.743582	0.0553901	0.695389		0.0553901	0.0385177	0.695389
33	36.3455	1.93897	1.34792	0.0533483	0.695173		0.0533483	0.0370863	0.695173		29.5382	1.57385	1.0941	0.0532819	0.695177		0.0532819	0.0370403	0.695177		19.1363	1.05266	0.732117	0.0550087	0.695492		0.0550087	0.0382581	0.695492
34	41.2343	2.21901	1.54202	0.0538147	0.694911		0.0538147	0.0373965	0.694911		27.0388	1.54247	1.07191	0.0570464	0.694931		0.0570464	0.0396433	0.694931		20.5828	1.0959	0.762308	0.0532434	0.695601		0.0532434	0.0370361	0.695601
35	42.2285	2.25373	1.56609	0.0533699	0.694889		0.0533699	0.0370861	0.694889		26.5004	1.43636	0.998559	0.0542014	0.695201		0.0542014	0.0376809	0.695201		23.375	1.24485	0.865806	0.0532559	0.695508		0.0532559	0.0370399	0.695508
36	39.1332	2.12512	1.47629	0.0543048	0.694686		0.0543048	0.0377248	0.694686		27.0226	1.44009	1.00127	0.053292	0.695286		0.053292	0.0370532	0.695286		22.3947	1.1925	0.829242	0.0532493	0.695379		0.0532493	0.0370284	0.695379
37	41.4172	2.21406	1.53848	0.0534575	0.694871		0.0534575	0.0371461	0.694871		27.9777	1.50007	1.04285	0.0536167	0.695199		0.0536167	0.0372743	0.695199		23.1418	1.23327	0.857957	0.0532919	0.695676		0.0532919	0.0370739	0.695676
38	41.7361	2.3847	1.65622	0.0571377	0.694519		0.0571377	0.0396832	0.694519		25.0972	1.34222	0.933304	0.0534807	0.695344		0.0534807	0.0371875	0.695344		22.618	1.20461	0.837586	0.0532588	0.695318		0.0532588	0.0370318	0.695318
39	32.4243	1.73035	1.20241	0.0533659	0.694895		0.0533659	0.0370837	0.694895		25.9597	1.38607	0.963901	0.053393	0.695422		0.053393	0.0371307	0.695422		20.9425	1.13509	0.789241	0.0542002	0.695311		0.0542002	0.037686	0.695311
40	32.3769	1.73466	1.20551	0.0535773	0.694955		0.0535773	0.0372338	0.694955		32.5713	2.09068	1.45344	0.0641879	0.6952		0.0641879	0.0446234	0.6952		23.4615	1.3907	0.966486	0.0592758	0.694964		0.0592758	0.0411946	0.694964
41	30.9967	1.65049	1.14704	0.0532472	0.694971		0.0532472	0.0370053	0.694971		31.5385	1.82076	1.26344	0.0577313	0.693907		0.0577313	0.0400602	0.693907		22.045	1.2243	0.851044	0.0555365	0.695127		0.0555365	0.0386049	0.695127
42	36.7408	1.95829	1.36092	0.0533002	0.694952		0.0533002	0.037041	0.694952		29.1102	1.57077	1.09201	0.0539595	0.695205		0.0539595	0.0375129	0.695205		19.0804	1.02346	0.711574	0.0536392	0.695264		0.0536392	0.0372934	0.695264
43	33.5123	1.79351	1.24653	0.0535179	0.695023		0.0535179	0.0371962	0.695023		28.2583	1.56963	1.09077	0.0555457	0.694923		0.0555457	0.0386	0.694923		18.6115	1.02817	0.714866	0.0552438	0.69528		0.0552438	0.0384099	0.69528
44	30.9858	1.69213	1.17547	0.0546099	0.694668		0.0546099	0.0379357	0.694668		27.3525	1.54103	1.07138	0.0563395	0.695234		0.0563395	0.0391692	0.695234		19.1282	1.02084	0.710032	0.0533685	0.695533		0.0533685	0.0371196	0.695533
45	34.7911	1.87579	1.30362	0.0539157	0.694973		0.0539157	0.03747	0.694973		29.6481	1.63209	1.13434	0.055049	0.695021		0.055049	0.0382602	0.695021		21.1125	1.13788	0.79142	0.0538962	0.695519		0.0538962	0.0374859	0.695519
46	31.5008	1.69391	1.17723	0.0537735	0.694976		0.0537735	0.0373713	0.694976		29.3223	1.56222	1.08565	0.0532776	0.694937		0.0532776	0.0370246	0.694937		21.7266	1.16992	0.813495	0.0538472	0.695344		0.0538472	0.0374423	0.695344
47	35.7731	1.90923	1.32707	0.0533705	0.695082		0.0533705	0.0370969	0.695082		27.3964	1.48648	1.0334	0.0542581	0.695203		0.0542581	0.0377204	0.695203		20.7802	1.18386	0.831809	0.0569706	0.702623		0.0569706	0.0400288	0.702623
48	35.8114	1.90873	1.32622	0.0532995	0.694818		0.0532995	0.0370335	0.694818		29.7891	1.66268	1.16312	0.0558151	0.699546		0.0558151	0.0390452	0.699546		19.056	1.0144	0.705658	0.0532329	0.695639		0.0532329	0.0370308	0.695639
49	37.0578	1.9871	1.38157	0.0536218	0.695268		0.0536218	0.0372815	0.695268		27.731	1.47878	1.02795	0.0533258	0.695137		0.0533258	0.0370687	0.695137		19.3807	1.03173	0.717629	0.053235	0.695558		0.053235	0.037028	0.695558
50	35.1374	1.92932	1.34078	0.0549079	0.694951		0.0549079	0.0381583	0.694951		30.5803	1.89735	1.32066	0.0620449	0.696051		0.0620449	0.0431864	0.696051		20.8566	1.14028	0.792939	0.0546723	0.695391		0.0546723	0.0380186	0.695391
51	34.455	1.85311	1.28759	0.0537836	0.694826		0.0537836	0.0373702	0.694826		27.7967	1.48131	1.02955	0.053291	0.695023		0.053291	0.0370385	0.695023		20.8213	1.11001	0.772131	0.0533112	0.695607		0.0533112	0.0370837	0.695607
52	31.1367	1.6609	1.15428	0.0533424	0.694972		0.0533424	0.0370715	0.694972		28.9795	1.62412	1.12849	0.0560438	0.694834		0.0560438	0.0389412	0.694834		19.4766	1.08175	0.752196	0.0555411	0.695349		0.0555411	0.0386204	0.695349
53	33.0477	1.75979	1.22315	0.0532499	0.695056		0.0532499	0.0370117	0.695056		24.9306	1.3273	0.922776	0.0532398	0.695228		0.0532398	0.0370138	0.695228		18.4607	0.983059	0.683739	0.0532514	0.695522		0.0532514	0.0370375	0.695522
54	34.3327	1.8317	1.27271	0.0533516	0.694825		0.0533516	0.03707	0.694825		25.0274	1.33901	0.931081	0.0535018	0.695351		0.0535018	0.0372025	0.695351		18.5845	0.992449	0.69038	0.0534019	0.695632		0.0534019	0.0371481	0.695632
55	34.7759	1.8532	1.28799	0.0532899	0.69501		0.0532899	0.037037	0.69501		26.7509	1.44815	1.00664	0.0541344	0.695124		0.0541344	0.0376301	0.695124		19.9145	1.06338	0.739637	0.0533974	0.695551		0.0533974	0.0371406	0.695551
56	36.4532	1.97601	1.37291	0.0542068	0.694787		0.0542068	0.0376622	0.694787		26.8612	1.43115	0.994771	0.0532796	0.695083		0.0532796	0.0370338	0.695083		21.2502	1.14546	0.796487	0.0539032	0.695345		0.0539032	0.0374814	0.695345
57	34.4767	1.85242	1.28704	0.0537294	0.694788		0.0537294	0.0373306	0.694788		26.2456	1.40316	0.975125	0.0534626	0.694951		0.0534626	0.0371539	0.694951		19.7281	1.16085	0.807164	0.0588424	0.695322		0.0588424	0.0409144	0.695322
58	34.5053	1.8384	1.2777	0.0532788	0.695004		0.0532788	0.037029	0.695004		26.8161	1.43529	0.99801	0.0535235	0.695337		0.0535235	0.0372168	0.695337		20.4527	1.09186	0.759263	0.0533848	0.695384		0.0533848	0.0371229	0.695384
59	30.8874	1.65852	1.15252	0.0536958	0.694908		0.0536958	0.0373136	0.694908		27.3371	1.46028	1.01511	0.0534176	0.695144		0.0534176	0.037133	0.695144		21.7136	1.16377	0.80946	0.0535963	0.695551		0.0535963	0.0372789	0.695551
60	27.9062	1.48587	1.03314	0.0532451	0.69531		0.0532451	0.0370219	0.69531		28.5279	1.52128	1.05747	0.0533261	0.695118		0.0533261	0.0370679	0.695118		22.033	1.18803	0.826284	0.0539205	0.695506		0.0539205	0.0375021	0.695506
***	L4	C	H4	C | L4	H4 | C						L4	C	H4	C | L4	H4 | C						L4	C	H4	C | L4	H4 | C
***	tbdgy	tbdgy	tbdgy	tbdgy - St	tbdgy - St						tbdgy	tbdgy	tbdgy	tbdgy - St	tbdgy - St						tbdgy	tbdgy	tbdgy	tbdgy - St	tbdgy - St
***	35.6067	1.93005	1.34132	0.0540096	0.723269	av	0.0538257	0.0374033	0.694898		26.5594	1.44926	1.00782	0.0543903	0.720261	av	0.0545813	0.0379512	0.695309		20.5559	1.11942	0.77873	0.0543392	0.716267	av	0.0544951	0.0379045	0.695556
***	4.53609	4.63564	4.63136	0.336385	1.69276	stabw	0.000678779	0.000467681	0.000151727		4.32612	4.39507	4.3904	0.487457	1.49684	stabw	0.0021862	0.0015289	0.000750569		4.57663	4.62306	4.61546	0.395587	1.30277	stabw	0.00176979	0.0012355	0.00104215
***	1.61515	0.08947	0.0621214	0.00018168	0.0122432	stabw/(n)^0.5	9.59938e-05	6.61401e-05	2.14574e-05		1.14899	0.0636962	0.0442473	0.00026513	0.0107811	stabw/(n)^0.5	0.000309176	0.000216219	0.000106146		0.940767	0.0517516	0.035942	0.000214959	0.00933133	stabw/(n)^0.5	0.000250286	0.000174727	0.000147382
***	35.1364	35.9075	35.8743	2.60562	13.1121	(stabw/(n)^0.5)/av /%	0.00178342	0.00176829	3.08785e-05		33.51	34.0441	34.0079	3.77583	11.5944	(stabw/(n)^0.5)/av /%	0.00566451	0.00569731	0.000152661		35.4504	35.81	35.7512	3.06421	10.0912	(stabw/(n)^0.5)/av /%	0.00459281	0.00460966	0.000211891
***	12.5109	0.693031	0.48119	0.00140729	0.0948356						8.90005	0.493389	0.342738	0.00205369	0.0835102						7.28715	0.400866	0.278405	0.00166506	0.0722802

## Sheet: spot size all data
	Laserablation - spot size characterization
	solid samples		WASO04
	dissolved sample		WASO04 4 µg/g
	Neptune XT
	ESI NWR213
	WASO04 Laserablation spot size 10 µm
	1st run						not blank corr				2nd run						not blank corr				3rd run						not blank corr
Cycle	27.94	28.925	29.916	28.925/27.94 (1)	29.916/28.925 (2)		29/28	30/28	30/29		27.94	28.925	29.916	28.925/27.94 (1)	29.916/28.925 (2)		29/28	30/28	30/29		27.94	28.925	29.916	28.925/27.94 (1)	29.916/28.925 (2)		29/28	30/28	30/29
1	0.0764569	0.00406529	0.00399674	0.053171	0.983139		0.053171	0.0522744	0.983139		0.0763139	0.00400398	0.00396665	0.0524673	0.990677		0.0524673	0.0519781	0.990677		0.0761968	0.0040205	0.00385423	0.0527647	0.958643		0.0527647	0.0505825	0.958643
2	0.0756864	0.00403132	0.00386381	0.0532635	0.958448		0.0532635	0.0510503	0.958448		0.0760521	0.00401411	0.00401564	0.052781	1.00038		0.052781	0.0528011	1.00038		0.0747939	0.00394833	0.00405633	0.0527894	1.02735		0.0527894	0.0542334	1.02735
3	0.0762711	0.00402857	0.0038853	0.0528191	0.964438		0.0528191	0.0509407	0.964438		0.0754776	0.00403627	0.00386662	0.0534764	0.957968		0.0534764	0.0512287	0.957968		0.0773787	0.00407783	0.00391817	0.0526997	0.960846		0.0526997	0.0506363	0.960846
4	0.0749158	0.00399802	0.00391439	0.0533668	0.979083		0.0533668	0.0522506	0.979083		0.0765443	0.00406227	0.00387148	0.0530708	0.953035		0.0530708	0.0505784	0.953035		0.0737144	0.00387807	0.00387127	0.0526094	0.998246		0.0526094	0.0525171	0.998246
5	0.0764923	0.00402492	0.00389926	0.0526185	0.96878		0.0526185	0.0509758	0.96878		0.0766876	0.0040452	0.00389921	0.052749	0.963911		0.052749	0.0508454	0.963911		0.0775562	0.00411399	0.00395593	0.0530454	0.961578		0.0530454	0.0510073	0.961578
6	2.59461	0.1377	0.096963	0.0530716	0.704161		0.0530716	0.037371	0.704161		1.75408	0.0932174	0.0660226	0.0531433	0.708265		0.0531433	0.0376395	0.708265		1.95955	0.104117	0.0735616	0.0531329	0.706529		0.0531329	0.03754	0.706529
7	6.19857	0.330224	0.230348	0.0532742	0.697549		0.0532742	0.0371614	0.697549		6.35271	0.338172	0.236083	0.0532327	0.698115		0.0532327	0.0371625	0.698115		6.95242	0.370311	0.258213	0.0532636	0.697287		0.0532636	0.03714	0.697287
8	3.41908	0.182812	0.128048	0.0534682	0.700433		0.0534682	0.0374509	0.700433		3.41705	0.18204	0.127554	0.0532741	0.700694		0.0532741	0.0373288	0.700694		4.24336	0.226114	0.157983	0.0532867	0.698688		0.0532867	0.0372308	0.698688
9	2.54718	0.135639	0.0953077	0.0532506	0.702658		0.0532506	0.037417	0.702658		3.06303	0.16317	0.114385	0.0532708	0.701015		0.0532708	0.0373436	0.701015		2.95226	0.157167	0.110333	0.0532361	0.702012		0.0532361	0.0373724	0.702012
10	2.65087	0.141223	0.0991615	0.0532742	0.702164		0.0532742	0.0374072	0.702164		2.93049	0.155994	0.109522	0.0532316	0.702089		0.0532316	0.0373733	0.702089		2.36322	0.125847	0.0884808	0.0532525	0.70308		0.0532525	0.0374408	0.70308
11	2.16109	0.115108	0.0810478	0.0532638	0.704104		0.0532638	0.0375033	0.704104		2.44114	0.129983	0.0913493	0.0532468	0.702781		0.0532468	0.0374208	0.702781		2.59219	0.13888	0.0974873	0.0535764	0.701952		0.0535764	0.0376081	0.701952
12	2.0385	0.108453	0.0764572	0.0532022	0.704983		0.0532022	0.0375067	0.704983		2.19157	0.116702	0.0821422	0.0532504	0.703862		0.0532504	0.0374809	0.703862		2.31364	0.123351	0.0866747	0.0533148	0.702665		0.0533148	0.0374624	0.702665
13	1.83361	0.097652	0.068924	0.0532568	0.705812		0.0532568	0.0375893	0.705812		2.05317	0.109331	0.0769921	0.05325	0.70421		0.05325	0.0374991	0.70421		2.37347	0.126415	0.0887816	0.0532616	0.702304		0.0532616	0.0374059	0.702304
14	2.05361	0.109291	0.0770014	0.053219	0.704555		0.053219	0.0374957	0.704555		1.93573	0.103016	0.0726684	0.0532185	0.705406		0.0532185	0.0375406	0.705406		2.26351	0.120508	0.0846873	0.0532396	0.702749		0.0532396	0.0374141	0.702749
15	2.48977	0.132577	0.0932106	0.0532485	0.70307		0.0532485	0.0374374	0.70307		2.10881	0.112333	0.0790461	0.0532684	0.703678		0.0532684	0.0374838	0.703678		1.85029	0.0984754	0.0695009	0.0532216	0.705769		0.0532216	0.0375622	0.705769
16	2.17018	0.11547	0.0812803	0.0532077	0.703908		0.0532077	0.0374533	0.703908		1.68008	0.0895001	0.063219	0.0532713	0.706357		0.0532713	0.0376285	0.706357		2.11982	0.112845	0.0794298	0.0532334	0.703882		0.0532334	0.03747	0.703882
17	2.76408	0.147169	0.103242	0.0532434	0.70152		0.0532434	0.0373513	0.70152		1.82255	0.0970061	0.0684222	0.0532253	0.705339		0.0532253	0.0375419	0.705339		2.14399	0.114222	0.0802136	0.0532754	0.702263		0.0532754	0.0374133	0.702263
18	3.36262	0.179089	0.12533	0.0532587	0.699818		0.0532587	0.0372714	0.699818		2.10295	0.111921	0.0788464	0.0532207	0.704485		0.0532207	0.0374932	0.704485		2.26792	0.120759	0.0848737	0.0532466	0.702835		0.0532466	0.0374236	0.702835
19	2.74782	0.146284	0.102749	0.0532365	0.702397		0.0532365	0.0373931	0.702397		2.27694	0.121197	0.0851675	0.0532278	0.702722		0.0532278	0.0374043	0.702722		2.2192	0.118342	0.0831389	0.0533265	0.702529		0.0533265	0.0374634	0.702529
20	2.21746	0.118038	0.0829915	0.0532315	0.703089		0.0532315	0.0374264	0.703089		1.8286	0.0973589	0.0686958	0.0532423	0.705593		0.0532423	0.0375674	0.705593		1.97825	0.105323	0.0741285	0.0532405	0.70382		0.0532405	0.0374717	0.70382
21	2.60899	0.139633	0.0980255	0.0535198	0.702024		0.0535198	0.0375722	0.702024		1.79639	0.0956402	0.0674301	0.0532404	0.705039		0.0532404	0.0375365	0.705039		1.99937	0.106373	0.0749329	0.0532032	0.704436		0.0532032	0.0374783	0.704436
22	2.05844	0.109582	0.0771828	0.0532353	0.704339		0.0532353	0.0374957	0.704339		2.04438	0.144036	0.101032	0.0704543	0.701435		0.0704543	0.0494191	0.701435		1.74574	0.0929884	0.0656077	0.0532659	0.705547		0.0532659	0.0375816	0.705547
23	2.24169	0.119447	0.0839781	0.0532844	0.703056		0.0532844	0.0374619	0.703056		2.65416	0.141974	0.0996407	0.0534911	0.701823		0.0534911	0.0375413	0.701823		1.88102	0.100118	0.0705649	0.0532253	0.70482		0.0532253	0.0375142	0.70482
24	2.45296	0.132326	0.0930648	0.0539455	0.703298		0.0539455	0.0379398	0.703298		3.15993	0.1683	0.117909	0.0532607	0.70059		0.0532607	0.0373139	0.70059		2.14085	0.113954	0.0801311	0.0532283	0.703189		0.0532283	0.0374295	0.703189
25	2.28799	0.121938	0.0856148	0.0532947	0.702119		0.0532947	0.0374192	0.702119		2.71405	0.144588	0.10146	0.053274	0.701719		0.053274	0.0373834	0.701719		1.99831	0.106364	0.0748787	0.0532271	0.703984		0.0532271	0.037471	0.703984
26	2.0055	0.106804	0.0750779	0.0532555	0.702951		0.0532555	0.037436	0.702951		2.94107	0.156523	0.109724	0.0532198	0.701007		0.0532198	0.0373074	0.701007		2.33065	0.124019	0.08715	0.0532123	0.702714		0.0532123	0.037393	0.702714
27	1.86604	0.0993809	0.0700202	0.0532577	0.704564		0.0532577	0.0375235	0.704564		2.48356	0.132262	0.0927634	0.0532551	0.701359		0.0532551	0.0373509	0.701359		2.43653	0.12973	0.0910447	0.0532439	0.701801		0.0532439	0.0373666	0.701801
28	2.18182	0.116113	0.0816767	0.0532183	0.703425		0.0532183	0.0374351	0.703425		2.18915	0.116534	0.0819823	0.0532325	0.703505		0.0532325	0.0374493	0.703505		2.59645	0.138206	0.0970517	0.0532288	0.702227		0.0532288	0.0373787	0.702227
29	2.46139	0.130975	0.0919819	0.0532118	0.702287		0.0532118	0.03737	0.702287		2.36153	0.177066	0.123784	0.0749796	0.699081		0.0749796	0.0524168	0.699081		2.16267	0.115178	0.0809354	0.0532574	0.702697		0.0532574	0.0374238	0.702697
30	2.12675	0.113223	0.0796441	0.0532374	0.703429		0.0532374	0.0374488	0.703429		2.12794	0.113544	0.079943	0.0533585	0.704074		0.0533585	0.0375683	0.704074		2.06282	0.109877	0.0773924	0.0532658	0.704352		0.0532658	0.0375179	0.704352
31	1.96699	0.10471	0.073667	0.0532338	0.703531		0.0532338	0.0374516	0.703531		2.40346	0.128011	0.089976	0.053261	0.702879		0.053261	0.037436	0.702879		2.35864	0.125622	0.0881892	0.0532603	0.702022		0.0532603	0.0373899	0.702022
32	2.39012	0.12717	0.0894143	0.0532066	0.703109		0.0532066	0.03741	0.703109		1.95831	0.104264	0.0735114	0.053242	0.705049		0.053242	0.0375382	0.705049		2.16411	0.115269	0.0810069	0.053264	0.702763		0.053264	0.037432	0.702763
33	2.83452	0.150898	0.105794	0.0532356	0.701101		0.0532356	0.0373235	0.701101		2.21509	0.117951	0.082935	0.0532489	0.70313		0.0532489	0.0374409	0.70313		1.88859	0.100523	0.0707581	0.0532263	0.703903		0.0532263	0.0374662	0.703903
34	3.15323	0.167821	0.11759	0.0532217	0.700688		0.0532217	0.0372918	0.700688		2.84142	0.227117	0.177908	0.0799307	0.783332		0.0799307	0.0626123	0.783332		2.56566	0.136514	0.0958469	0.053208	0.702105		0.053208	0.0373576	0.702105
35	2.6538	0.141314	0.0991405	0.0532498	0.701561		0.0532498	0.037358	0.701561		2.08574	0.111049	0.0782087	0.0532417	0.704276		0.0532417	0.0374968	0.704276		2.36456	0.125992	0.0884408	0.0532837	0.701954		0.0532837	0.0374027	0.701954
36	2.44595	0.130148	0.0913538	0.0532096	0.701922		0.0532096	0.037349	0.701922		2.40529	0.128016	0.0899237	0.0532228	0.702441		0.0532228	0.0373859	0.702441		2.65443	0.141211	0.0990095	0.0531985	0.701143		0.0531985	0.0372998	0.701143
37	2.93016	0.155919	0.109383	0.0532117	0.701537		0.0532117	0.03733	0.701537		2.58694	0.137663	0.0966488	0.0532147	0.702068		0.0532147	0.0373603	0.702068		3.0528	0.173317	0.121475	0.0567731	0.700887		0.0567731	0.0397915	0.700887
38	3.22439	0.171633	0.120202	0.0532297	0.700341		0.0532297	0.037279	0.700341		3.25616	0.173323	0.121386	0.0532294	0.700342		0.0532294	0.0372788	0.700342		2.35861	0.133518	0.0936065	0.0566087	0.70108		0.0566087	0.0396872	0.70108
39	3.24926	0.189057	0.132244	0.0581846	0.699497		0.0581846	0.0406999	0.699497		3.3283	0.177083	0.124044	0.0532052	0.700486		0.0532052	0.0372695	0.700486		2.60764	0.138785	0.0973918	0.0532224	0.701747		0.0532224	0.0373487	0.701747
40	2.73699	0.145785	0.102226	0.0532646	0.701214		0.0532646	0.0373499	0.701214		3.22891	0.172008	0.120438	0.0532712	0.700186		0.0532712	0.0372998	0.700186		2.2557	0.120125	0.0843473	0.0532542	0.702161		0.0532542	0.037393	0.702161
41	2.26591	0.12067	0.0847538	0.0532544	0.702362		0.0532544	0.0374039	0.702362		2.83495	0.150908	0.105897	0.0532313	0.701732		0.0532313	0.0373541	0.701732		2.43284	0.129579	0.0908039	0.0532622	0.700763		0.0532622	0.0373242	0.700763
42	1.93774	0.103194	0.0726804	0.0532548	0.704307		0.0532548	0.0375077	0.704307		2.94243	0.156823	0.110054	0.0532971	0.701772		0.0532971	0.0374024	0.701772		2.89087	0.153843	0.108045	0.0532168	0.702307		0.0532168	0.0373745	0.702307
43	2.52065	0.13406	0.0942305	0.0531847	0.702899		0.0531847	0.0373834	0.702899		2.80935	0.149502	0.104837	0.053216	0.701243		0.053216	0.0373174	0.701243		3.30326	0.175849	0.123153	0.053235	0.700335		0.053235	0.0372823	0.700335
44	3.23777	0.242855	0.169547	0.0750068	0.69814		0.0750068	0.0523652	0.69814		3.04307	0.162273	0.113764	0.0533255	0.701065		0.0533255	0.0373846	0.701065		3.01678	0.160586	0.112529	0.0532308	0.70074		0.0532308	0.037301	0.70074
45	2.60513	0.138728	0.0973748	0.0532519	0.701911		0.0532519	0.0373781	0.701911		2.65119	0.141169	0.0989949	0.0532476	0.70125		0.0532476	0.0373399	0.70125		3.21336	0.171058	0.119795	0.0532332	0.700318		0.0532332	0.0372802	0.700318
46	3.12772	0.166481	0.116608	0.0532276	0.700428		0.0532276	0.0372821	0.700428		2.86271	0.152359	0.106816	0.053222	0.701081		0.053222	0.037313	0.701081		2.45393	0.13066	0.0917483	0.0532452	0.702191		0.0532452	0.0373883	0.702191
47	3.52301	0.187663	0.131349	0.0532677	0.699919		0.0532677	0.0372831	0.699919		2.47734	0.131757	0.0926656	0.0531847	0.703308		0.0531847	0.0374052	0.703308		2.39864	0.127643	0.0895885	0.0532146	0.701869		0.0532146	0.0373497	0.701869
48	3.40573	0.18131	0.126858	0.0532369	0.699673		0.0532369	0.0372484	0.699673		3.08174	0.164648	0.115398	0.0534269	0.700879		0.0534269	0.0374458	0.700879		2.79658	0.148951	0.10446	0.0532618	0.701304		0.0532618	0.0373527	0.701304
49	3.18893	0.169715	0.118951	0.0532201	0.700884		0.0532201	0.0373011	0.700884		3.1784	0.169317	0.11846	0.0532713	0.699631		0.0532713	0.0372702	0.699631		3.21914	0.171215	0.12002	0.0531866	0.700988		0.0531866	0.0372832	0.700988
50	3.21443	0.171123	0.119877	0.0532361	0.700529		0.0532361	0.0372934	0.700529		3.26186	0.173575	0.121601	0.0532135	0.700569		0.0532135	0.0372798	0.700569		2.77806	0.147897	0.103654	0.0532375	0.700855		0.0532375	0.0373117	0.700855
51	3.17065	0.168807	0.11815	0.0532405	0.69991		0.0532405	0.0372636	0.69991		2.7579	0.146863	0.102976	0.0532517	0.701172		0.0532517	0.0373386	0.701172		3.26399	0.173722	0.121691	0.0532237	0.700495		0.0532237	0.0372829	0.700495
52	3.15201	0.1681	0.117644	0.053331	0.699848		0.053331	0.0373236	0.699848		3.15946	0.168295	0.118003	0.0532671	0.701168		0.0532671	0.0373492	0.701168		3.03833	0.161699	0.113334	0.0532197	0.700895		0.0532197	0.0373014	0.700895
53	3.22226	0.171543	0.120061	0.0532367	0.699889		0.0532367	0.0372597	0.699889		2.95677	0.157414	0.110355	0.0532384	0.701052		0.0532384	0.0373229	0.701052		2.90113	0.154378	0.108298	0.0532131	0.701509		0.0532131	0.0373295	0.701509
54	3.43298	0.182624	0.127989	0.0531971	0.700832		0.0531971	0.0372823	0.700832		2.90629	0.154683	0.108483	0.0532235	0.701325		0.0532235	0.037327	0.701325		3.11296	0.165694	0.116069	0.0532273	0.700498		0.0532273	0.0372856	0.700498
55	3.67172	0.19538	0.136875	0.053212	0.700557		0.053212	0.037278	0.700557		3.07637	0.163764	0.114734	0.0532329	0.700606		0.0532329	0.0372953	0.700606		3.00164	0.159781	0.11184	0.0532312	0.699959		0.0532312	0.0372597	0.699959
56	3.9504	0.2165	0.151418	0.0548044	0.699392		0.0548044	0.0383298	0.699392		2.85504	0.152052	0.106593	0.0532573	0.701029		0.0532573	0.0373349	0.701029		2.89464	0.154106	0.108094	0.0532384	0.701429		0.0532384	0.0373429	0.701429
57	2.91293	0.155175	0.108777	0.0532712	0.700992		0.0532712	0.0373427	0.700992		2.7483	0.146264	0.102553	0.0532198	0.701151		0.0532198	0.0373152	0.701151		2.97289	0.158189	0.110835	0.0532105	0.70065		0.0532105	0.0372819	0.70065
58	2.58164	0.137407	0.0964631	0.0532247	0.702024		0.0532247	0.037365	0.702024		3.07855	0.163857	0.114784	0.0532255	0.700511		0.0532255	0.037285	0.700511		2.98689	0.158991	0.111468	0.0532297	0.701096		0.0532297	0.0373191	0.701096
59	3.29277	0.175133	0.122695	0.0531872	0.700583		0.0531872	0.0372621	0.700583		3.17398	0.168976	0.118265	0.053238	0.69989		0.053238	0.0372607	0.69989		4.08593	0.217466	0.152069	0.0532233	0.699274		0.0532233	0.0372177	0.699274
60	3.07969	0.163922	0.114834	0.0532267	0.700544		0.0532267	0.0372876	0.700544		2.68326	0.142936	0.100162	0.0532695	0.700744		0.0532695	0.0373283	0.700744		3.35293	0.17842	0.124873	0.0532131	0.699883		0.0532131	0.0372429	0.699883
***	L4	C	H4	C | L4	H4 | C						L4	C	H4	C | L4	H4 | C						L4	C	H4	C | L4	H4 | C
***	tbdgy	tbdgy	tbdgy	tbdgy - St	tbdgy - St						tbdgy	tbdgy	tbdgy	tbdgy - St	tbdgy - St						tbdgy	tbdgy	tbdgy	tbdgy - St	tbdgy - St
***	2.55	0.137352	0.0964339	0.0537121	0.724262	av	0.0537121	0.0388852	0.724262		2.46101	0.133758	0.094263	0.0543169	0.726093	av	0.0543169	0.0394402	0.726093		2.44521	0.130502	0.0916546	0.0533205	0.725299	av	0.0533205	0.0386605	0.725299
***	5.1173	5.24024	5.18033	0.691673	1.33725	stabw	0.00287772	0.00431764	0.0750213		5.16376	5.2157	5.22486	1.16317	1.3527	stabw	0.00489386	0.00544904	0.0760797		5.51888	5.51901	5.45429	0.156853	1.39318	stabw	0.000647831	0.0040383	0.0782711
***	0.130491	0.0071976	0.0049956	0.000371512	0.0096852	stabw/(n)^0.5	0.000371512	0.000557405	0.0096852		0.127081	0.00697643	0.00492511	0.000631795	0.00982185	stabw/(n)^0.5	0.000631795	0.000703468	0.00982185		0.134948	0.00720243	0.0049991	8.36346e-05	0.0101048	stabw/(n)^0.5	8.36346e-05	0.000521342	0.0101048
***	39.6385	40.5907	40.1267	5.35768	10.3583	(stabw/(n)^0.5)/av /%	0.00691673	0.0143346	0.0133725		39.9983	40.4007	40.4716	9.00984	10.478	(stabw/(n)^0.5)/av /%	0.0116317	0.0178363	0.013527		42.7491	42.7501	42.2487	1.21498	10.7916	(stabw/(n)^0.5)/av /%	0.00156853	0.0134851	0.0139318
***	1.01078	0.0557523	0.0386957	0.00287772	0.0750213						0.984364	0.0540392	0.0381497	0.00489386	0.0760797						1.04531	0.0557898	0.0387229	0.000647831	0.0782711
	11.4466	0.628514	0.437263	0.00104151	0.0839318
	WASO04 Laserablation spot size 20 µm
	1st run						not blank corr				2nd run						not blank corr				3rd run						not blank corr
Cycle	27.94	28.925	29.916	28.925/27.94 (1)	29.916/28.925 (2)		29/28	30/28	30/29		27.94	28.925	29.916	28.925/27.94 (1)	29.916/28.925 (2)		29/28	30/28	30/29		27.94	28.925	29.916	28.925/27.94 (1)	29.916/28.925 (2)		29/28	30/28	30/29
1	0.0767911	0.00409889	0.0039764	0.0533772	0.970115		0.0533772	0.051782	0.970115		0.0757589	0.00401293	0.00399524	0.0529697	0.995593		0.0529697	0.0527362	0.995593		0.0776772	0.00415221	0.00400955	0.0534547	0.965644		0.0534547	0.0516182	0.965644
2	0.0776838	0.00411099	0.00405299	0.0529195	0.985893		0.0529195	0.052173	0.985893		0.0758331	0.0040548	0.0039199	0.05347	0.966731		0.05347	0.0516911	0.966731		0.0772161	0.00404878	0.00393468	0.0524344	0.971819		0.0524344	0.0509568	0.971819
3	0.0766351	0.00400666	0.00389079	0.0522823	0.97108		0.0522823	0.0507703	0.97108		0.0762895	0.00399783	0.0039551	0.0524034	0.989313		0.0524034	0.0518433	0.989313		0.0783011	0.00419891	0.00400647	0.0536253	0.954167		0.0536253	0.0511675	0.954167
4	0.0775799	0.00409494	0.00398958	0.0527836	0.97427		0.0527836	0.0514255	0.97427		0.0765284	0.00402473	0.00394424	0.0525912	0.980002		0.0525912	0.0515395	0.980002		0.0774819	0.00409796	0.00402986	0.0528892	0.983383		0.0528892	0.0520103	0.983383
5	0.0778821	0.00411943	0.00403144	0.0528932	0.97864		0.0528932	0.0517634	0.97864		0.0768429	0.00407085	0.00392631	0.0529763	0.964494		0.0529763	0.0510953	0.964494		0.0779828	0.00411634	0.00409559	0.0527852	0.99496		0.0527852	0.0525192	0.99496
6	4.56658	0.242495	0.170095	0.053102	0.70144		0.053102	0.0372478	0.70144		4.38053	0.23265	0.163137	0.05311	0.701213		0.05311	0.0372414	0.701213		5.47029	0.2921	0.204647	0.0533975	0.700608		0.0533975	0.0374107	0.700608
7	12.3426	0.657219	0.457652	0.0532478	0.696346		0.0532478	0.0370789	0.696346		12.3413	0.657966	0.458315	0.053314	0.696563		0.053314	0.0371366	0.696563		13.3319	0.710135	0.494498	0.053266	0.696343		0.053266	0.0370914	0.696343
8	9.68067	0.515889	0.359626	0.0532906	0.697101		0.0532906	0.0371489	0.697101		11.8288	0.63045	0.439205	0.0532978	0.696654		0.0532978	0.0371301	0.696654		10.8658	0.580554	0.404267	0.0534297	0.696347		0.0534297	0.0372056	0.696347
9	8.93841	0.476085	0.331866	0.0532628	0.697072		0.0532628	0.037128	0.697072		11.6683	0.621283	0.432939	0.0532454	0.696847		0.0532454	0.0371039	0.696847		11.4038	0.60783	0.423371	0.0533006	0.696528		0.0533006	0.0371254	0.696528
10	9.46285	0.503995	0.35128	0.0532603	0.696992		0.0532603	0.037122	0.696992		12.4696	0.66731	0.464475	0.053515	0.696041		0.053515	0.0372486	0.696041		9.69296	0.516219	0.359719	0.0532571	0.696835		0.0532571	0.0371114	0.696835
11	8.52137	0.454465	0.316783	0.0533324	0.697047		0.0533324	0.0371752	0.697047		11.677	0.621997	0.433183	0.053267	0.696439		0.053267	0.0370972	0.696439		9.15588	0.487849	0.339784	0.0532826	0.696494		0.0532826	0.037111	0.696494
12	8.39611	0.447167	0.311739	0.0532588	0.697142		0.0532588	0.0371289	0.697142		10.9866	0.585824	0.408326	0.0533216	0.697012		0.0533216	0.0371658	0.697012		10.0699	0.53826	0.375187	0.0534523	0.697037		0.0534523	0.0372582	0.697037
13	7.20967	0.383967	0.267723	0.0532573	0.697254		0.0532573	0.0371339	0.697254		10.6099	0.565092	0.393568	0.0532606	0.696467		0.0532606	0.0370943	0.696467		10.1219	0.539154	0.375579	0.0532664	0.696607		0.0532664	0.0371057	0.696607
14	8.17067	0.435128	0.303417	0.0532549	0.697306		0.0532549	0.0371349	0.697306		9.83233	0.523615	0.364775	0.0532544	0.696649		0.0532544	0.0370996	0.696649		9.94502	0.530828	0.369835	0.0533763	0.696715		0.0533763	0.037188	0.696715
15	8.20105	0.436815	0.304567	0.0532633	0.697244		0.0532633	0.0371375	0.697244		10.294	0.549141	0.382557	0.0533457	0.696646		0.0533457	0.037163	0.696646		8.73484	0.465126	0.324222	0.0532495	0.697063		0.0532495	0.0371182	0.697063
16	7.8594	0.418376	0.291785	0.0532326	0.697423		0.0532326	0.0371256	0.697423		10.4238	0.555075	0.38665	0.0532507	0.696571		0.0532507	0.0370929	0.696571		9.42479	0.502552	0.350073	0.0533223	0.696591		0.0533223	0.0371438	0.696591
17	8.20552	0.437068	0.304681	0.0532652	0.697102		0.0532652	0.0371313	0.697102		10.6581	0.567897	0.395405	0.0532829	0.696262		0.0532829	0.0370988	0.696262		9.8102	0.534932	0.372712	0.0545282	0.696746		0.0545282	0.0379923	0.696746
18	8.8335	0.471216	0.328552	0.0533442	0.697243		0.0533442	0.0371939	0.697243		9.63832	0.513308	0.357608	0.053257	0.696673		0.053257	0.0371027	0.696673		11.0349	0.595325	0.414392	0.053949	0.696077		0.053949	0.0375527	0.696077
19	8.82448	0.470311	0.327785	0.0532962	0.696954		0.0532962	0.037145	0.696954		9.87334	0.525894	0.366447	0.053264	0.696809		0.053264	0.0371148	0.696809		10.697	0.569637	0.396865	0.0532519	0.696699		0.0532519	0.0371005	0.696699
20	8.32472	0.454431	0.31686	0.0545881	0.697269		0.0545881	0.0380626	0.697269		11.0161	0.586403	0.408359	0.0532317	0.696379		0.0532317	0.0370694	0.696379		10.02	0.533515	0.371764	0.0532448	0.696821		0.0532448	0.0371021	0.696821
21	8.38618	0.446615	0.311236	0.053256	0.696878		0.053256	0.0371129	0.696878		10.4176	0.554831	0.386512	0.0532593	0.69663		0.0532593	0.037102	0.69663		10.0612	0.53569	0.37307	0.0532429	0.696429		0.0532429	0.0370799	0.696429
22	8.53508	0.454608	0.316749	0.0532635	0.696752		0.0532635	0.0371114	0.696752		11.527	0.617441	0.429917	0.0535646	0.696288		0.0535646	0.0372964	0.696288		9.47378	0.53635	0.373502	0.0566142	0.696377		0.0566142	0.0394248	0.696377
23	8.9924	0.478959	0.333832	0.0532626	0.696995		0.0532626	0.0371238	0.696995		11.8881	0.636914	0.443586	0.0535756	0.696461		0.0535756	0.0373133	0.696461		9.91049	0.530945	0.369674	0.0535741	0.696257		0.0535741	0.0373013	0.696257
24	8.08374	0.455132	0.317063	0.0563022	0.69664		0.0563022	0.0392223	0.69664		10.9932	0.585632	0.40781	0.0532722	0.69636		0.0532722	0.0370966	0.69636		11.8349	0.709633	0.493562	0.0599611	0.695518		0.0599611	0.0417041	0.695518
25	8.427	0.448647	0.312778	0.0532393	0.697158		0.0532393	0.0371162	0.697158		10.6627	0.567571	0.395387	0.0532295	0.696629		0.0532295	0.0370813	0.696629		11.0582	0.588965	0.410009	0.0532606	0.696152		0.0532606	0.0370775	0.696152
26	9.127	0.508457	0.354247	0.0557092	0.696709		0.0557092	0.0388131	0.696709		11.3239	0.602936	0.419774	0.0532447	0.696217		0.0532447	0.0370699	0.696217		10.1232	0.542155	0.377621	0.0535559	0.696519		0.0535559	0.0373027	0.696519
27	8.96927	0.477579	0.332809	0.0532462	0.696866		0.0532462	0.0371054	0.696866		11.4269	0.608712	0.424042	0.0532699	0.696622		0.0532699	0.037109	0.696622		9.39204	0.500274	0.348477	0.0532657	0.696573		0.0532657	0.0371034	0.696573
28	8.39036	0.447103	0.311596	0.0532878	0.696921		0.0532878	0.0371374	0.696921		12.147	0.647038	0.450507	0.0532674	0.69626		0.0532674	0.037088	0.69626		11.1562	0.625589	0.435483	0.0560756	0.696117		0.0560756	0.0390352	0.696117
29	8.50459	0.452804	0.315647	0.0532423	0.697094		0.0532423	0.0371149	0.697094		11.3538	0.604529	0.420874	0.0532447	0.696201		0.0532447	0.037069	0.696201		10.4878	0.558534	0.389084	0.0532553	0.696618		0.0532553	0.0370986	0.696618
30	8.23781	0.438908	0.306011	0.0532797	0.69721		0.0532797	0.0371472	0.69721		10.5195	0.560067	0.390147	0.0532411	0.696607		0.0532411	0.0370881	0.696607		10.6448	0.621032	0.432391	0.0583413	0.696245		0.0583413	0.0406198	0.696245
31	9.0629	0.48271	0.336184	0.0532622	0.69645		0.0532622	0.0370945	0.69645		11.5313	0.614115	0.427537	0.0532566	0.696184		0.0532566	0.0370764	0.696184		11.0546	0.630194	0.438551	0.0570072	0.695899		0.0570072	0.0396713	0.695899
32	9.57794	0.509923	0.355196	0.0532393	0.696568		0.0532393	0.0370848	0.696568		9.88773	0.526669	0.366706	0.0532649	0.696274		0.0532649	0.037087	0.696274		8.83414	0.470529	0.32788	0.0532626	0.696833		0.0532626	0.0371151	0.696833
33	9.28839	0.494416	0.344479	0.0532295	0.696739		0.0532295	0.0370871	0.696739		10.5495	0.561675	0.391071	0.0532417	0.69626		0.0532417	0.0370701	0.69626		9.17056	0.488336	0.340173	0.0532504	0.696596		0.0532504	0.037094	0.696596
34	10.2729	0.546892	0.380906	0.0532366	0.696492		0.0532366	0.0370789	0.696492		10.5536	0.562023	0.391405	0.053254	0.696421		0.053254	0.0370872	0.696421		9.65585	0.514183	0.358126	0.0532509	0.696495		0.0532509	0.037089	0.696495
35	9.40835	0.500903	0.348817	0.0532403	0.696376		0.0532403	0.0370752	0.696376		11.2278	0.599596	0.417374	0.0534028	0.696093		0.0534028	0.0371734	0.696093		9.56436	0.509215	0.35482	0.0532409	0.696799		0.0532409	0.0370982	0.696799
36	8.64846	0.460282	0.320666	0.0532213	0.696672		0.0532213	0.0370778	0.696672		11.3273	0.607766	0.423154	0.053655	0.696245		0.053655	0.037357	0.696245		9.24433	0.492317	0.342868	0.0532561	0.696438		0.0532561	0.0370896	0.696438
37	9.07948	0.535249	0.372647	0.0589515	0.696212		0.0589515	0.0410427	0.696212		10.6778	0.570165	0.396818	0.053397	0.69597		0.053397	0.0371627	0.69597		9.22946	0.493699	0.344005	0.0534916	0.696792		0.0534916	0.0372725	0.696792
38	8.64287	0.462776	0.32238	0.0535442	0.696623		0.0535442	0.0373001	0.696623		9.94329	0.52964	0.368894	0.0532661	0.696499		0.0532661	0.0370997	0.696499		8.66901	0.461693	0.321625	0.0532579	0.696621		0.0532579	0.0371006	0.696621
39	8.5367	0.455539	0.317439	0.0533625	0.696842		0.0533625	0.0371852	0.696842		10.3623	0.551539	0.384281	0.0532258	0.696743		0.0532258	0.0370847	0.696743		9.16244	0.503815	0.350912	0.054987	0.696509		0.054987	0.038299	0.696509
40	9.01916	0.480064	0.334529	0.0532272	0.696842		0.0532272	0.037091	0.696842		12.7107	0.679029	0.472634	0.0534217	0.696044		0.0534217	0.0371839	0.696044		10.2459	0.545609	0.380109	0.0532514	0.69667		0.0532514	0.0370986	0.69667
41	9.18032	0.488843	0.340573	0.053249	0.696693		0.053249	0.0370982	0.696693		11.5641	0.615986	0.428889	0.053267	0.696264		0.053267	0.0370879	0.696264		11.8107	0.631978	0.43994	0.0535088	0.696131		0.0535088	0.0372492	0.696131
42	10.4135	0.554381	0.385875	0.0532368	0.696046		0.0532368	0.0370552	0.696046		11.1064	0.59139	0.411829	0.0532474	0.696375		0.0532474	0.0370802	0.696375		11.9916	0.645852	0.449577	0.0538589	0.696099		0.0538589	0.0374912	0.696099
43	9.48727	0.505747	0.352166	0.053308	0.696329		0.053308	0.0371199	0.696329		11.2313	0.598564	0.41672	0.0532943	0.6962		0.0532943	0.0371035	0.6962		11.9108	0.634165	0.441526	0.053243	0.696231		0.053243	0.0370694	0.696231
44	10.5114	0.566251	0.394259	0.0538702	0.696262		0.0538702	0.0375078	0.696262		10.8453	0.577618	0.402085	0.0532596	0.696109		0.0532596	0.0370745	0.696109		12.0927	0.643928	0.448271	0.0532491	0.69615		0.0532491	0.0370694	0.69615
45	10.1309	0.539265	0.37553	0.0532297	0.696374		0.0532297	0.0370678	0.696374		11.2594	0.599655	0.417369	0.0532583	0.696015		0.0532583	0.0370685	0.696015		11.661	0.621236	0.432572	0.0532745	0.696308		0.0532745	0.0370955	0.696308
46	10.0594	0.53667	0.373701	0.0533501	0.696332		0.0533501	0.0371494	0.696332		19.6175	1.36166	0.945364	0.0694107	0.694272		0.0694107	0.0481899	0.694272		10.4496	0.556921	0.387831	0.0532958	0.696383		0.0532958	0.0371143	0.696383
47	8.92533	0.475526	0.331245	0.0532782	0.696587		0.0532782	0.0371129	0.696587		13.5639	0.722358	0.502848	0.0532561	0.696121		0.0532561	0.0370727	0.696121		10.3342	0.553828	0.385621	0.0535916	0.696283		0.0535916	0.0373149	0.696283
48	9.8844	0.526215	0.366442	0.053237	0.696372		0.053237	0.0370727	0.696372		13.5273	0.723568	0.503436	0.0534894	0.695769		0.0534894	0.0372163	0.695769		11.0629	0.58911	0.410241	0.053251	0.696375		0.053251	0.0370827	0.696375
49	8.68394	0.462493	0.322167	0.0532584	0.696588		0.0532584	0.0370992	0.696588		11.5464	0.615	0.427925	0.0532632	0.695813		0.0532632	0.0370612	0.695813		11.5658	0.61986	0.43166	0.0535941	0.696383		0.0535941	0.037322	0.696383
50	9.22374	0.492154	0.342705	0.0533573	0.696337		0.0533573	0.0371546	0.696337		11.4969	0.612053	0.426104	0.0532366	0.696188		0.0532366	0.0370626	0.696188		10.867	0.580983	0.404392	0.053463	0.696048		0.053463	0.0372128	0.696048
51	9.16082	0.48791	0.339847	0.0532605	0.696536		0.0532605	0.0370979	0.696536		10.3682	0.552133	0.384603	0.0532524	0.696577		0.0532524	0.0370944	0.696577		11.1511	0.597002	0.415723	0.0535376	0.696352		0.0535376	0.037281	0.696352
52	8.78977	0.468137	0.32594	0.0532593	0.696251		0.0532593	0.0370818	0.696251		9.93661	0.529125	0.368469	0.05325	0.696375		0.05325	0.037082	0.696375		11.3308	0.603796	0.420442	0.0532879	0.696331		0.0532879	0.037106	0.696331
53	8.26236	0.440038	0.306744	0.0532581	0.697085		0.0532581	0.0371254	0.697085		12.3596	0.658343	0.458139	0.0532658	0.695898		0.0532658	0.0370676	0.695898		10.3262	0.549854	0.382914	0.0532485	0.696391		0.0532485	0.0370818	0.696391
54	8.92613	0.475221	0.331191	0.0532393	0.696919		0.0532393	0.0371035	0.696919		11.1936	0.597005	0.415435	0.0533346	0.695866		0.0533346	0.0371137	0.695866		12.5023	0.666233	0.463669	0.0532891	0.695955		0.0532891	0.0370868	0.695955
55	9.41114	0.502751	0.350164	0.0534208	0.696497		0.0534208	0.0372074	0.696497		11.6996	0.622731	0.433503	0.0532269	0.696132		0.0532269	0.0370529	0.696132		12.7752	0.746686	0.519381	0.0584479	0.695581		0.0584479	0.0406553	0.695581
56	9.5197	0.507602	0.353758	0.0533213	0.69692		0.0533213	0.0371607	0.69692		10.1665	0.542204	0.377524	0.0533326	0.696277		0.0533326	0.0371342	0.696277		10.6498	0.567068	0.394728	0.053247	0.696087		0.053247	0.0370645	0.696087
57	8.24457	0.438839	0.305814	0.0532276	0.696871		0.0532276	0.0370928	0.696871		9.37852	0.499461	0.347917	0.0532558	0.696585		0.0532558	0.0370972	0.696585		10.4591	0.556985	0.387748	0.0532534	0.696155		0.0532534	0.0370726	0.696155
58	9.54484	0.508409	0.354086	0.0532654	0.696459		0.0532654	0.0370971	0.696459		10.2982	0.54849	0.382002	0.053261	0.696462		0.053261	0.0370942	0.696462		9.03121	0.480756	0.334976	0.0532328	0.696768		0.0532328	0.0370909	0.696768
59	8.59859	0.457991	0.319062	0.0532635	0.696657		0.0532635	0.0371064	0.696657		11.7579	0.696405	0.484551	0.0592286	0.69579		0.0592286	0.0412106	0.69579		10.393	0.553477	0.385461	0.0532548	0.696436		0.0532548	0.0370885	0.696436
60	9.05931	0.482395	0.336127	0.0532485	0.696789		0.0532485	0.037103	0.696789		11.7635	0.626471	0.43616	0.0532554	0.696217		0.0532554	0.0370773	0.696217		8.55975	0.455887	0.317627	0.0532594	0.696723		0.0532594	0.037107	0.696723
***	L4	C	H4	C | L4	H4 | C						L4	C	H4	C | L4	H4 | C						L4	C	H4	C | L4	H4 | C
***	tbdgy	tbdgy	tbdgy	tbdgy - St	tbdgy - St						tbdgy	tbdgy	tbdgy	tbdgy - St	tbdgy - St						tbdgy	tbdgy	tbdgy	tbdgy - St	tbdgy - St
***	8.18554	0.437991	0.305283	0.0534542	0.720115	av	0.0534542	0.0384791	0.720115		10.2299	0.551703	0.384233	0.0536305	0.719961	av	0.0536305	0.0385934	0.719961		9.5011	0.512316	0.356887	0.0538092	0.719619	av	0.0538092	0.0387037	0.719619
***	4.17274	4.17685	4.16025	0.220452	1.39521	stabw	0.000912792	0.00403368	0.0778245		4.41846	4.80478	4.78728	0.53388	1.41505	stabw	0.00221784	0.00428923	0.0789144		4.23812	4.29233	4.27761	0.342379	1.38956	stabw	0.00142705	0.00405774	0.0774559
***	0.341561	0.0182942	0.0127005	0.000117841	0.0100471	stabw/(n)^0.5	0.000117841	0.000520746	0.0100471		0.452002	0.0265081	0.0183943	0.000286323	0.0101878	stabw/(n)^0.5	0.000286323	0.000553737	0.0101878		0.402668	0.0219903	0.0152662	0.000184231	0.00999951	stabw/(n)^0.5	0.000184231	0.000523851	0.00999951
***	32.3219	32.3537	32.2251	1.70761	10.8072	(stabw/(n)^0.5)/av /%	0.00220452	0.0135332	0.0139521		34.2252	37.2177	37.0821	4.13542	10.9609	(stabw/(n)^0.5)/av /%	0.0053388	0.014348	0.0141505		32.8284	33.2482	33.1342	2.65205	10.7635	(stabw/(n)^0.5)/av /%	0.00342379	0.0135349	0.0138956
***	2.64572	0.141706	0.0983777	0.000912792	0.0778245						3.50119	0.205331	0.142482	0.00221784	0.0789144						3.11905	0.170336	0.118252	0.00142705	0.0774559
	WASO04 Laserablation spot size 40 µm
	1st run						not blank corr				2nd run						not blank corr				3rd run						not blank corr
Cycle	27.94	28.925	29.916	28.925/27.94 (1)	29.916/28.925 (2)		29/28	30/28	30/29		27.94	28.925	29.916	28.925/27.94 (1)	29.916/28.925 (2)		29/28	30/28	30/29		27.94	28.925	29.916	28.925/27.94 (1)	29.916/28.925 (2)		29/28	30/28	30/29
1	0.0698819	0.00369254	0.00393487	0.0528397	1.06563		0.0528397	0.0563074	1.06563		0.0770291	0.00407299	0.0041085	0.0528761	1.00872		0.0528761	0.053337	1.00872		0.0774381	0.00416745	0.00407906	0.0538165	0.97879		0.0538165	0.052675	0.97879
2	0.0711119	0.00376356	0.00383288	0.0529245	1.01842		0.0529245	0.0538992	1.01842		0.076464	0.00405239	0.00393132	0.0529973	0.970126		0.0529973	0.0514141	0.970126		0.0766698	0.0041211	0.0040996	0.0537513	0.994783		0.0537513	0.0534709	0.994783
3	0.0702388	0.00374733	0.00387473	0.0533513	1.034		0.0533513	0.0551651	1.034		0.0745727	0.00395373	0.00392711	0.0530185	0.993266		0.0530185	0.0526615	0.993266		0.236661	0.0125686	0.0100087	0.053108	0.796324		0.053108	0.0422912	0.796324
4	0.0691984	0.00366493	0.00376247	0.0529626	1.02661		0.0529626	0.0543722	1.02661		0.0748414	0.00396008	0.00406498	0.052913	1.02649		0.052913	0.0543145	1.02649		0.0812786	0.00435897	0.00418963	0.0536299	0.961152		0.0536299	0.0515465	0.961152
5	0.0754455	0.00396641	0.00408242	0.0525732	1.02925		0.0525732	0.0541108	1.02925		0.082928	0.00440536	0.00428215	0.0531227	0.972032		0.0531227	0.051637	0.972032		0.0787227	0.00419613	0.00413078	0.0533027	0.984425		0.0533027	0.0524725	0.984425
6	14.6451	0.78633	0.548542	0.0536923	0.697598		0.0536923	0.0374556	0.697598		7.98355	0.431526	0.301246	0.054052	0.698095		0.054052	0.0377334	0.698095		6.02501	0.319904	0.224086	0.0530959	0.70048		0.0530959	0.0371926	0.70048
7	46.3013	2.62557	1.82516	0.0567061	0.695149		0.0567061	0.0394192	0.695149		27.8573	1.49494	1.04009	0.0536642	0.695738		0.0536642	0.0373362	0.695738		21.0572	1.12125	0.780459	0.0532479	0.696062		0.0532479	0.0370638	0.696062
8	50.7016	3.14853	2.18788	0.0620992	0.69489		0.0620992	0.0431521	0.69489		35.9763	1.92643	1.33927	0.0535472	0.695208		0.0535472	0.0372264	0.695208		28.9204	1.54422	1.07393	0.0533954	0.695453		0.0533954	0.037134	0.695453
9	49.9346	2.87982	2.00106	0.0576718	0.694854		0.0576718	0.0400735	0.694854		33.8942	1.80498	1.25515	0.0532534	0.695384		0.0532534	0.0370316	0.695384		27.9718	1.53778	1.06941	0.0549762	0.695425		0.0549762	0.0382318	0.695425
10	45.084	2.45588	1.70646	0.0544735	0.694844		0.0544735	0.0378506	0.694844		30.4181	1.6703	1.16109	0.0549114	0.695135		0.0549114	0.0381709	0.695135		26.8505	1.43038	0.994538	0.0532722	0.695294		0.0532722	0.0370399	0.695294
11	43.169	2.32816	1.61775	0.0539312	0.694861		0.0539312	0.0374747	0.694861		33.2864	1.86859	1.29895	0.0561368	0.69515		0.0561368	0.0390235	0.69515		27.5769	1.4786	1.02859	0.0536172	0.695656		0.0536172	0.0372991	0.695656
12	40.6931	2.19498	1.52541	0.0539398	0.694954		0.0539398	0.0374857	0.694954		29.1392	1.559	1.08363	0.0535018	0.695085		0.0535018	0.0371883	0.695085		25.4784	1.36531	0.949444	0.053587	0.695405		0.053587	0.0372647	0.695405
13	43.9575	2.36409	1.64344	0.0537813	0.695169		0.0537813	0.0373871	0.695169		29.4353	1.6001	1.11236	0.05436	0.695178		0.05436	0.0377899	0.695178		28.7707	1.53749	1.06933	0.0534394	0.695504		0.0534394	0.0371674	0.695504
14	44.4972	2.39203	1.66214	0.0537569	0.694864		0.0537569	0.0373537	0.694864		26.0877	1.40013	0.973781	0.0536701	0.695494		0.0536701	0.0373272	0.695494		30.3	1.74814	1.21504	0.0576945	0.695044		0.0576945	0.0401002	0.695044
15	38.9142	2.13361	1.48263	0.0548286	0.694891		0.0548286	0.0380999	0.694891		27.1251	1.45849	1.01379	0.0537691	0.695094		0.0537691	0.0373746	0.695094		29.5438	1.57893	1.09801	0.0534436	0.695412		0.0534436	0.0371653	0.695412
16	47.4877	2.61013	1.81377	0.0549644	0.694896		0.0549644	0.0381945	0.694896		28.8178	1.53795	1.06939	0.0533682	0.695332		0.0533682	0.0371086	0.695332		27.773	1.48117	1.02983	0.0533313	0.695284		0.0533313	0.0370804	0.695284
17	45.1394	2.41318	1.67706	0.0534606	0.694959		0.0534606	0.0371529	0.694959		29.5338	1.5771	1.09651	0.0533999	0.695266		0.0533999	0.0371271	0.695266		28.7239	1.54273	1.07253	0.0537091	0.695213		0.0537091	0.0373392	0.695213
18	45.8116	2.5017	1.7383	0.0546084	0.694847		0.0546084	0.0379445	0.694847		30.4956	1.62655	1.1309	0.0533373	0.695275		0.0533373	0.0370841	0.695275		26.2348	1.46781	1.0211	0.0559491	0.695657		0.0559491	0.0389214	0.695657
19	46.9704	2.51727	1.74908	0.0535927	0.694833		0.0535927	0.037238	0.694833		30.4233	1.6254	1.13024	0.053426	0.695363		0.053426	0.0371505	0.695363		27.5376	1.59327	1.10747	0.057858	0.695094		0.057858	0.0402168	0.695094
20	47.1296	2.54036	1.76497	0.0539015	0.694772		0.0539015	0.0374493	0.694772		30.4684	1.62696	1.13108	0.0533983	0.695212		0.0533983	0.0371231	0.695212		26.1382	1.3936	0.969136	0.0533165	0.695421		0.0533165	0.0370774	0.695421
21	43.8079	2.35748	1.63832	0.053814	0.694947		0.053814	0.0373979	0.694947		33.7208	1.82255	1.26689	0.0540483	0.695119		0.0540483	0.0375701	0.695119		25.9003	1.47066	1.0222	0.0567814	0.69506		0.0567814	0.0394665	0.69506
22	46.1724	2.46736	1.7146	0.0534381	0.694912		0.0534381	0.0371347	0.694912		34.1171	1.88104	1.30705	0.0551348	0.694858		0.0551348	0.0383108	0.694858		21.7819	1.16305	0.808854	0.0533951	0.695461		0.0533951	0.0371342	0.695461
23	45.2598	2.41852	1.68041	0.0534364	0.694807		0.0534364	0.037128	0.694807		32.6948	1.78198	1.23875	0.0545035	0.695156		0.0545035	0.0378884	0.695156		21.4085	1.14648	0.797506	0.0535526	0.695613		0.0535526	0.0372519	0.695613
24	46.6528	2.50378	1.73964	0.0536685	0.694804		0.0536685	0.0372891	0.694804		32.1565	1.71416	1.19146	0.0533067	0.695072		0.0533067	0.037052	0.695072		22.3644	1.22483	0.852242	0.0547668	0.695806		0.0547668	0.0381071	0.695806
25	43.5326	2.32294	1.61413	0.0533609	0.694866		0.0533609	0.0370787	0.694866		33.9866	1.81052	1.25851	0.0532716	0.695109		0.0532716	0.0370296	0.695109		21.8434	1.26209	0.876862	0.0577789	0.694769		0.0577789	0.040143	0.694769
26	40.4431	2.18936	1.52126	0.0541345	0.694843		0.0541345	0.037615	0.694843		34.2983	1.84315	1.28138	0.0537387	0.695211		0.0537387	0.0373597	0.695211		21.1055	1.12409	0.781862	0.0532606	0.695549		0.0532606	0.0370453	0.695549
27	36.8473	2.02587	1.4075	0.0549802	0.694765		0.0549802	0.0381983	0.694765		34.5398	1.84939	1.28524	0.0535439	0.694954		0.0535439	0.0372105	0.694954		22.8467	1.22176	0.849736	0.0534762	0.695504		0.0534762	0.0371929	0.695504
28	39.1189	2.1144	1.46922	0.0540507	0.694861		0.0540507	0.0375577	0.694861		29.6225	1.66236	1.15868	0.0561183	0.697009		0.0561183	0.0391149	0.697009		21.0771	1.12312	0.781262	0.0532863	0.695617		0.0532863	0.0370669	0.695617
29	36.6512	1.95809	1.36073	0.0534251	0.694928		0.0534251	0.0371266	0.694928		31.2574	1.83057	1.27555	0.0585643	0.696803		0.0585643	0.0408078	0.696803		22.7659	1.21503	0.845367	0.0533705	0.69576		0.0533705	0.0371331	0.69576
30	43.4022	2.33714	1.62395	0.0538484	0.694844		0.0538484	0.0374162	0.694844		28.1063	1.5412	1.07139	0.0548347	0.695163		0.0548347	0.0381191	0.695163		23.3775	1.38937	0.965589	0.0594317	0.694986		0.0594317	0.0413042	0.694986
31	44.4084	2.39598	1.66415	0.0539533	0.69456		0.0539533	0.0374738	0.69456		27.5553	1.46867	1.02079	0.0532989	0.695042		0.0532989	0.037045	0.695042		20.2581	1.08059	0.751358	0.0533412	0.695321		0.0533412	0.0370892	0.695321
32	38.1346	2.03242	1.4118	0.053296	0.694641		0.053296	0.0370216	0.694641		28.4742	1.5167	1.05468	0.0532659	0.695379		0.0532659	0.03704	0.695379		19.3049	1.0693	0.743582	0.0553901	0.695389		0.0553901	0.0385177	0.695389
33	36.3455	1.93897	1.34792	0.0533483	0.695173		0.0533483	0.0370863	0.695173		29.5382	1.57385	1.0941	0.0532819	0.695177		0.0532819	0.0370403	0.695177		19.1363	1.05266	0.732117	0.0550087	0.695492		0.0550087	0.0382581	0.695492
34	41.2343	2.21901	1.54202	0.0538147	0.694911		0.0538147	0.0373965	0.694911		27.0388	1.54247	1.07191	0.0570464	0.694931		0.0570464	0.0396433	0.694931		20.5828	1.0959	0.762308	0.0532434	0.695601		0.0532434	0.0370361	0.695601
35	42.2285	2.25373	1.56609	0.0533699	0.694889		0.0533699	0.0370861	0.694889		26.5004	1.43636	0.998559	0.0542014	0.695201		0.0542014	0.0376809	0.695201		23.375	1.24485	0.865806	0.0532559	0.695508		0.0532559	0.0370399	0.695508
36	39.1332	2.12512	1.47629	0.0543048	0.694686		0.0543048	0.0377248	0.694686		27.0226	1.44009	1.00127	0.053292	0.695286		0.053292	0.0370532	0.695286		22.3947	1.1925	0.829242	0.0532493	0.695379		0.0532493	0.0370284	0.695379
37	41.4172	2.21406	1.53848	0.0534575	0.694871		0.0534575	0.0371461	0.694871		27.9777	1.50007	1.04285	0.0536167	0.695199		0.0536167	0.0372743	0.695199		23.1418	1.23327	0.857957	0.0532919	0.695676		0.0532919	0.0370739	0.695676
38	41.7361	2.3847	1.65622	0.0571377	0.694519		0.0571377	0.0396832	0.694519		25.0972	1.34222	0.933304	0.0534807	0.695344		0.0534807	0.0371875	0.695344		22.618	1.20461	0.837586	0.0532588	0.695318		0.0532588	0.0370318	0.695318
39	32.4243	1.73035	1.20241	0.0533659	0.694895		0.0533659	0.0370837	0.694895		25.9597	1.38607	0.963901	0.053393	0.695422		0.053393	0.0371307	0.695422		20.9425	1.13509	0.789241	0.0542002	0.695311		0.0542002	0.037686	0.695311
40	32.3769	1.73466	1.20551	0.0535773	0.694955		0.0535773	0.0372338	0.694955		32.5713	2.09068	1.45344	0.0641879	0.6952		0.0641879	0.0446234	0.6952		23.4615	1.3907	0.966486	0.0592758	0.694964		0.0592758	0.0411946	0.694964
41	30.9967	1.65049	1.14704	0.0532472	0.694971		0.0532472	0.0370053	0.694971		31.5385	1.82076	1.26344	0.0577313	0.693907		0.0577313	0.0400602	0.693907		22.045	1.2243	0.851044	0.0555365	0.695127		0.0555365	0.0386049	0.695127
42	36.7408	1.95829	1.36092	0.0533002	0.694952		0.0533002	0.037041	0.694952		29.1102	1.57077	1.09201	0.0539595	0.695205		0.0539595	0.0375129	0.695205		19.0804	1.02346	0.711574	0.0536392	0.695264		0.0536392	0.0372934	0.695264
43	33.5123	1.79351	1.24653	0.0535179	0.695023		0.0535179	0.0371962	0.695023		28.2583	1.56963	1.09077	0.0555457	0.694923		0.0555457	0.0386	0.694923		18.6115	1.02817	0.714866	0.0552438	0.69528		0.0552438	0.0384099	0.69528
44	30.9858	1.69213	1.17547	0.0546099	0.694668		0.0546099	0.0379357	0.694668		27.3525	1.54103	1.07138	0.0563395	0.695234		0.0563395	0.0391692	0.695234		19.1282	1.02084	0.710032	0.0533685	0.695533		0.0533685	0.0371196	0.695533
45	34.7911	1.87579	1.30362	0.0539157	0.694973		0.0539157	0.03747	0.694973		29.6481	1.63209	1.13434	0.055049	0.695021		0.055049	0.0382602	0.695021		21.1125	1.13788	0.79142	0.0538962	0.695519		0.0538962	0.0374859	0.695519
46	31.5008	1.69391	1.17723	0.0537735	0.694976		0.0537735	0.0373713	0.694976		29.3223	1.56222	1.08565	0.0532776	0.694937		0.0532776	0.0370246	0.694937		21.7266	1.16992	0.813495	0.0538472	0.695344		0.0538472	0.0374423	0.695344
47	35.7731	1.90923	1.32707	0.0533705	0.695082		0.0533705	0.0370969	0.695082		27.3964	1.48648	1.0334	0.0542581	0.695203		0.0542581	0.0377204	0.695203		20.7802	1.18386	0.831809	0.0569706	0.702623		0.0569706	0.0400288	0.702623
48	35.8114	1.90873	1.32622	0.0532995	0.694818		0.0532995	0.0370335	0.694818		29.7891	1.66268	1.16312	0.0558151	0.699546		0.0558151	0.0390452	0.699546		19.056	1.0144	0.705658	0.0532329	0.695639		0.0532329	0.0370308	0.695639
49	37.0578	1.9871	1.38157	0.0536218	0.695268		0.0536218	0.0372815	0.695268		27.731	1.47878	1.02795	0.0533258	0.695137		0.0533258	0.0370687	0.695137		19.3807	1.03173	0.717629	0.053235	0.695558		0.053235	0.037028	0.695558
50	35.1374	1.92932	1.34078	0.0549079	0.694951		0.0549079	0.0381583	0.694951		30.5803	1.89735	1.32066	0.0620449	0.696051		0.0620449	0.0431864	0.696051		20.8566	1.14028	0.792939	0.0546723	0.695391		0.0546723	0.0380186	0.695391
51	34.455	1.85311	1.28759	0.0537836	0.694826		0.0537836	0.0373702	0.694826		27.7967	1.48131	1.02955	0.053291	0.695023		0.053291	0.0370385	0.695023		20.8213	1.11001	0.772131	0.0533112	0.695607		0.0533112	0.0370837	0.695607
52	31.1367	1.6609	1.15428	0.0533424	0.694972		0.0533424	0.0370715	0.694972		28.9795	1.62412	1.12849	0.0560438	0.694834		0.0560438	0.0389412	0.694834		19.4766	1.08175	0.752196	0.0555411	0.695349		0.0555411	0.0386204	0.695349
53	33.0477	1.75979	1.22315	0.0532499	0.695056		0.0532499	0.0370117	0.695056		24.9306	1.3273	0.922776	0.0532398	0.695228		0.0532398	0.0370138	0.695228		18.4607	0.983059	0.683739	0.0532514	0.695522		0.0532514	0.0370375	0.695522
54	34.3327	1.8317	1.27271	0.0533516	0.694825		0.0533516	0.03707	0.694825		25.0274	1.33901	0.931081	0.0535018	0.695351		0.0535018	0.0372025	0.695351		18.5845	0.992449	0.69038	0.0534019	0.695632		0.0534019	0.0371481	0.695632
55	34.7759	1.8532	1.28799	0.0532899	0.69501		0.0532899	0.037037	0.69501		26.7509	1.44815	1.00664	0.0541344	0.695124		0.0541344	0.0376301	0.695124		19.9145	1.06338	0.739637	0.0533974	0.695551		0.0533974	0.0371406	0.695551
56	36.4532	1.97601	1.37291	0.0542068	0.694787		0.0542068	0.0376622	0.694787		26.8612	1.43115	0.994771	0.0532796	0.695083		0.0532796	0.0370338	0.695083		21.2502	1.14546	0.796487	0.0539032	0.695345		0.0539032	0.0374814	0.695345
57	34.4767	1.85242	1.28704	0.0537294	0.694788		0.0537294	0.0373306	0.694788		26.2456	1.40316	0.975125	0.0534626	0.694951		0.0534626	0.0371539	0.694951		19.7281	1.16085	0.807164	0.0588424	0.695322		0.0588424	0.0409144	0.695322
58	34.5053	1.8384	1.2777	0.0532788	0.695004		0.0532788	0.037029	0.695004		26.8161	1.43529	0.99801	0.0535235	0.695337		0.0535235	0.0372168	0.695337		20.4527	1.09186	0.759263	0.0533848	0.695384		0.0533848	0.0371229	0.695384
59	30.8874	1.65852	1.15252	0.0536958	0.694908		0.0536958	0.0373136	0.694908		27.3371	1.46028	1.01511	0.0534176	0.695144		0.0534176	0.037133	0.695144		21.7136	1.16377	0.80946	0.0535963	0.695551		0.0535963	0.0372789	0.695551
60	27.9062	1.48587	1.03314	0.0532451	0.69531		0.0532451	0.0370219	0.69531		28.5279	1.52128	1.05747	0.0533261	0.695118		0.0533261	0.0370679	0.695118		22.033	1.18803	0.826284	0.0539205	0.695506		0.0539205	0.0375021	0.695506
***	L4	C	H4	C | L4	H4 | C						L4	C	H4	C | L4	H4 | C						L4	C	H4	C | L4	H4 | C
***	tbdgy	tbdgy	tbdgy	tbdgy - St	tbdgy - St						tbdgy	tbdgy	tbdgy	tbdgy - St	tbdgy - St						tbdgy	tbdgy	tbdgy	tbdgy - St	tbdgy - St
***	35.6067	1.93005	1.34132	0.0540096	0.723269	av	0.0540096	0.0390329	0.723269		26.5594	1.44926	1.00782	0.0543903	0.720261	av	0.0543903	0.0391403	0.720261		20.5559	1.11942	0.77873	0.0543392	0.716267	av	0.0543392	0.0389057	0.716267
***	4.53609	4.63564	4.63136	0.336385	1.69276	stabw	0.00140729	0.00488492	0.0948356		4.32612	4.39507	4.3904	0.487457	1.49684	stabw	0.00205369	0.00435883	0.0835102		4.57663	4.62306	4.61546	0.395587	1.30277	stabw	0.00166506	0.00389561	0.0722802
***	1.61515	0.08947	0.0621214	0.00018168	0.0122432	stabw/(n)^0.5	0.00018168	0.00063064	0.0122432		1.14899	0.0636962	0.0442473	0.00026513	0.0107811	stabw/(n)^0.5	0.00026513	0.000562723	0.0107811		0.940767	0.0517516	0.035942	0.000214959	0.00933133	stabw/(n)^0.5	0.000214959	0.000502921	0.00933133
***	35.1364	35.9075	35.8743	2.60562	13.1121	(stabw/(n)^0.5)/av /%	0.00336385	0.0161567	0.0169276		33.51	34.0441	34.0079	3.77583	11.5944	(stabw/(n)^0.5)/av /%	0.00487457	0.0143771	0.0149684		35.4504	35.81	35.7512	3.06421	10.0912	(stabw/(n)^0.5)/av /%	0.00395587	0.0129267	0.0130277
***	12.5109	0.693031	0.48119	0.00140729	0.0948356						8.90005	0.493389	0.342738	0.00205369	0.0835102						7.28715	0.400866	0.278405	0.00166506	0.0722802

## Sheet: spot size wo outlier
	Laserablation - spot size characterization
	solid samples		WASO04
	dossplved sample		WASO04 4 µg/g
	Neptune XT
	ESI NWR213
	without first ten data (outlier)
	WASO04 Laserablation spot size 10 µm
	1st run						not blank corr				2nd run						not blank corr				3rd run						not blank corr
Cycle	27.94	28.925	29.916	28.925/27.94 (1)	29.916/28.925 (2)		29/28	30/28	30/29		27.94	28.925	29.916	28.925/27.94 (1)	29.916/28.925 (2)		29/28	30/28	30/29		27.94	28.925	29.916	28.925/27.94 (1)	29.916/28.925 (2)		29/28	30/28	30/29
11	2.16109	0.115108	0.0810478	0.0532638	0.704104		0.0532638	0.0375033	0.704104		2.44114	0.129983	0.0913493	0.0532468	0.702781		0.0532468	0.0374208	0.702781		2.59219	0.13888	0.0974873	0.0535764	0.701952		0.0535764	0.0376081	0.701952
12	2.0385	0.108453	0.0764572	0.0532022	0.704983		0.0532022	0.0375067	0.704983		2.19157	0.116702	0.0821422	0.0532504	0.703862		0.0532504	0.0374809	0.703862		2.31364	0.123351	0.0866747	0.0533148	0.702665		0.0533148	0.0374624	0.702665
13	1.83361	0.097652	0.068924	0.0532568	0.705812		0.0532568	0.0375893	0.705812		2.05317	0.109331	0.0769921	0.05325	0.70421		0.05325	0.0374991	0.70421		2.37347	0.126415	0.0887816	0.0532616	0.702304		0.0532616	0.0374059	0.702304
14	2.05361	0.109291	0.0770014	0.053219	0.704555		0.053219	0.0374957	0.704555		1.93573	0.103016	0.0726684	0.0532185	0.705406		0.0532185	0.0375406	0.705406		2.26351	0.120508	0.0846873	0.0532396	0.702749		0.0532396	0.0374141	0.702749
15	2.48977	0.132577	0.0932106	0.0532485	0.70307		0.0532485	0.0374374	0.70307		2.10881	0.112333	0.0790461	0.0532684	0.703678		0.0532684	0.0374838	0.703678		1.85029	0.0984754	0.0695009	0.0532216	0.705769		0.0532216	0.0375622	0.705769
16	2.17018	0.11547	0.0812803	0.0532077	0.703908		0.0532077	0.0374533	0.703908		1.68008	0.0895001	0.063219	0.0532713	0.706357		0.0532713	0.0376285	0.706357		2.11982	0.112845	0.0794298	0.0532334	0.703882		0.0532334	0.03747	0.703882
17	2.76408	0.147169	0.103242	0.0532434	0.70152		0.0532434	0.0373513	0.70152		1.82255	0.0970061	0.0684222	0.0532253	0.705339		0.0532253	0.0375419	0.705339		2.14399	0.114222	0.0802136	0.0532754	0.702263		0.0532754	0.0374133	0.702263
18	3.36262	0.179089	0.12533	0.0532587	0.699818		0.0532587	0.0372714	0.699818		2.10295	0.111921	0.0788464	0.0532207	0.704485		0.0532207	0.0374932	0.704485		2.26792	0.120759	0.0848737	0.0532466	0.702835		0.0532466	0.0374236	0.702835
19	2.74782	0.146284	0.102749	0.0532365	0.702397		0.0532365	0.0373931	0.702397		2.27694	0.121197	0.0851675	0.0532278	0.702722		0.0532278	0.0374043	0.702722		2.2192	0.118342	0.0831389	0.0533265	0.702529		0.0533265	0.0374634	0.702529
20	2.21746	0.118038	0.0829915	0.0532315	0.703089		0.0532315	0.0374264	0.703089		1.8286	0.0973589	0.0686958	0.0532423	0.705593		0.0532423	0.0375674	0.705593		1.97825	0.105323	0.0741285	0.0532405	0.70382		0.0532405	0.0374717	0.70382
21	2.60899	0.139633	0.0980255	0.0535198	0.702024		0.0535198	0.0375722	0.702024		1.79639	0.0956402	0.0674301	0.0532404	0.705039		0.0532404	0.0375365	0.705039		1.99937	0.106373	0.0749329	0.0532032	0.704436		0.0532032	0.0374783	0.704436
22	2.05844	0.109582	0.0771828	0.0532353	0.704339		0.0532353	0.0374957	0.704339		2.04438	0.144036	0.101032	0.0704543	0.701435		0.0704543	0.0494191	0.701435		1.74574	0.0929884	0.0656077	0.0532659	0.705547		0.0532659	0.0375816	0.705547
23	2.24169	0.119447	0.0839781	0.0532844	0.703056		0.0532844	0.0374619	0.703056		2.65416	0.141974	0.0996407	0.0534911	0.701823		0.0534911	0.0375413	0.701823		1.88102	0.100118	0.0705649	0.0532253	0.70482		0.0532253	0.0375142	0.70482
24	2.45296	0.132326	0.0930648	0.0539455	0.703298		0.0539455	0.0379398	0.703298		3.15993	0.1683	0.117909	0.0532607	0.70059		0.0532607	0.0373139	0.70059		2.14085	0.113954	0.0801311	0.0532283	0.703189		0.0532283	0.0374295	0.703189
25	2.28799	0.121938	0.0856148	0.0532947	0.702119		0.0532947	0.0374192	0.702119		2.71405	0.144588	0.10146	0.053274	0.701719		0.053274	0.0373834	0.701719		1.99831	0.106364	0.0748787	0.0532271	0.703984		0.0532271	0.037471	0.703984
26	2.0055	0.106804	0.0750779	0.0532555	0.702951		0.0532555	0.037436	0.702951		2.94107	0.156523	0.109724	0.0532198	0.701007		0.0532198	0.0373074	0.701007		2.33065	0.124019	0.08715	0.0532123	0.702714		0.0532123	0.037393	0.702714
27	1.86604	0.0993809	0.0700202	0.0532577	0.704564		0.0532577	0.0375235	0.704564		2.48356	0.132262	0.0927634	0.0532551	0.701359		0.0532551	0.0373509	0.701359		2.43653	0.12973	0.0910447	0.0532439	0.701801		0.0532439	0.0373666	0.701801
28	2.18182	0.116113	0.0816767	0.0532183	0.703425		0.0532183	0.0374351	0.703425		2.18915	0.116534	0.0819823	0.0532325	0.703505		0.0532325	0.0374493	0.703505		2.59645	0.138206	0.0970517	0.0532288	0.702227		0.0532288	0.0373787	0.702227
29	2.46139	0.130975	0.0919819	0.0532118	0.702287		0.0532118	0.03737	0.702287		2.36153	0.177066	0.123784	0.0749796	0.699081		0.0749796	0.0524168	0.699081		2.16267	0.115178	0.0809354	0.0532574	0.702697		0.0532574	0.0374238	0.702697
30	2.12675	0.113223	0.0796441	0.0532374	0.703429		0.0532374	0.0374488	0.703429		2.12794	0.113544	0.079943	0.0533585	0.704074		0.0533585	0.0375683	0.704074		2.06282	0.109877	0.0773924	0.0532658	0.704352		0.0532658	0.0375179	0.704352
31	1.96699	0.10471	0.073667	0.0532338	0.703531		0.0532338	0.0374516	0.703531		2.40346	0.128011	0.089976	0.053261	0.702879		0.053261	0.037436	0.702879		2.35864	0.125622	0.0881892	0.0532603	0.702022		0.0532603	0.0373899	0.702022
32	2.39012	0.12717	0.0894143	0.0532066	0.703109		0.0532066	0.03741	0.703109		1.95831	0.104264	0.0735114	0.053242	0.705049		0.053242	0.0375382	0.705049		2.16411	0.115269	0.0810069	0.053264	0.702763		0.053264	0.037432	0.702763
33	2.83452	0.150898	0.105794	0.0532356	0.701101		0.0532356	0.0373235	0.701101		2.21509	0.117951	0.082935	0.0532489	0.70313		0.0532489	0.0374409	0.70313		1.88859	0.100523	0.0707581	0.0532263	0.703903		0.0532263	0.0374662	0.703903
34	3.15323	0.167821	0.11759	0.0532217	0.700688		0.0532217	0.0372918	0.700688		2.84142	0.227117	0.177908	0.0799307	0.783332		0.0799307	0.0626123	0.783332		2.56566	0.136514	0.0958469	0.053208	0.702105		0.053208	0.0373576	0.702105
35	2.6538	0.141314	0.0991405	0.0532498	0.701561		0.0532498	0.037358	0.701561		2.08574	0.111049	0.0782087	0.0532417	0.704276		0.0532417	0.0374968	0.704276		2.36456	0.125992	0.0884408	0.0532837	0.701954		0.0532837	0.0374027	0.701954
36	2.44595	0.130148	0.0913538	0.0532096	0.701922		0.0532096	0.037349	0.701922		2.40529	0.128016	0.0899237	0.0532228	0.702441		0.0532228	0.0373859	0.702441		2.65443	0.141211	0.0990095	0.0531985	0.701143		0.0531985	0.0372998	0.701143
37	2.93016	0.155919	0.109383	0.0532117	0.701537		0.0532117	0.03733	0.701537		2.58694	0.137663	0.0966488	0.0532147	0.702068		0.0532147	0.0373603	0.702068		3.0528	0.173317	0.121475	0.0567731	0.700887		0.0567731	0.0397915	0.700887
38	3.22439	0.171633	0.120202	0.0532297	0.700341		0.0532297	0.037279	0.700341		3.25616	0.173323	0.121386	0.0532294	0.700342		0.0532294	0.0372788	0.700342		2.35861	0.133518	0.0936065	0.0566087	0.70108		0.0566087	0.0396872	0.70108
39	3.24926	0.189057	0.132244	0.0581846	0.699497		0.0581846	0.0406999	0.699497		3.3283	0.177083	0.124044	0.0532052	0.700486		0.0532052	0.0372695	0.700486		2.60764	0.138785	0.0973918	0.0532224	0.701747		0.0532224	0.0373487	0.701747
40	2.73699	0.145785	0.102226	0.0532646	0.701214		0.0532646	0.0373499	0.701214		3.22891	0.172008	0.120438	0.0532712	0.700186		0.0532712	0.0372998	0.700186		2.2557	0.120125	0.0843473	0.0532542	0.702161		0.0532542	0.037393	0.702161
41	2.26591	0.12067	0.0847538	0.0532544	0.702362		0.0532544	0.0374039	0.702362		2.83495	0.150908	0.105897	0.0532313	0.701732		0.0532313	0.0373541	0.701732		2.43284	0.129579	0.0908039	0.0532622	0.700763		0.0532622	0.0373242	0.700763
42	1.93774	0.103194	0.0726804	0.0532548	0.704307		0.0532548	0.0375077	0.704307		2.94243	0.156823	0.110054	0.0532971	0.701772		0.0532971	0.0374024	0.701772		2.89087	0.153843	0.108045	0.0532168	0.702307		0.0532168	0.0373745	0.702307
43	2.52065	0.13406	0.0942305	0.0531847	0.702899		0.0531847	0.0373834	0.702899		2.80935	0.149502	0.104837	0.053216	0.701243		0.053216	0.0373174	0.701243		3.30326	0.175849	0.123153	0.053235	0.700335		0.053235	0.0372823	0.700335
44	3.23777	0.242855	0.169547	0.0750068	0.69814		0.0750068	0.0523652	0.69814		3.04307	0.162273	0.113764	0.0533255	0.701065		0.0533255	0.0373846	0.701065		3.01678	0.160586	0.112529	0.0532308	0.70074		0.0532308	0.037301	0.70074
45	2.60513	0.138728	0.0973748	0.0532519	0.701911		0.0532519	0.0373781	0.701911		2.65119	0.141169	0.0989949	0.0532476	0.70125		0.0532476	0.0373399	0.70125		3.21336	0.171058	0.119795	0.0532332	0.700318		0.0532332	0.0372802	0.700318
46	3.12772	0.166481	0.116608	0.0532276	0.700428		0.0532276	0.0372821	0.700428		2.86271	0.152359	0.106816	0.053222	0.701081		0.053222	0.037313	0.701081		2.45393	0.13066	0.0917483	0.0532452	0.702191		0.0532452	0.0373883	0.702191
47	3.52301	0.187663	0.131349	0.0532677	0.699919		0.0532677	0.0372831	0.699919		2.47734	0.131757	0.0926656	0.0531847	0.703308		0.0531847	0.0374052	0.703308		2.39864	0.127643	0.0895885	0.0532146	0.701869		0.0532146	0.0373497	0.701869
48	3.40573	0.18131	0.126858	0.0532369	0.699673		0.0532369	0.0372484	0.699673		3.08174	0.164648	0.115398	0.0534269	0.700879		0.0534269	0.0374458	0.700879		2.79658	0.148951	0.10446	0.0532618	0.701304		0.0532618	0.0373527	0.701304
49	3.18893	0.169715	0.118951	0.0532201	0.700884		0.0532201	0.0373011	0.700884		3.1784	0.169317	0.11846	0.0532713	0.699631		0.0532713	0.0372702	0.699631		3.21914	0.171215	0.12002	0.0531866	0.700988		0.0531866	0.0372832	0.700988
50	3.21443	0.171123	0.119877	0.0532361	0.700529		0.0532361	0.0372934	0.700529		3.26186	0.173575	0.121601	0.0532135	0.700569		0.0532135	0.0372798	0.700569		2.77806	0.147897	0.103654	0.0532375	0.700855		0.0532375	0.0373117	0.700855
51	3.17065	0.168807	0.11815	0.0532405	0.69991		0.0532405	0.0372636	0.69991		2.7579	0.146863	0.102976	0.0532517	0.701172		0.0532517	0.0373386	0.701172		3.26399	0.173722	0.121691	0.0532237	0.700495		0.0532237	0.0372829	0.700495
52	3.15201	0.1681	0.117644	0.053331	0.699848		0.053331	0.0373236	0.699848		3.15946	0.168295	0.118003	0.0532671	0.701168		0.0532671	0.0373492	0.701168		3.03833	0.161699	0.113334	0.0532197	0.700895		0.0532197	0.0373014	0.700895
53	3.22226	0.171543	0.120061	0.0532367	0.699889		0.0532367	0.0372597	0.699889		2.95677	0.157414	0.110355	0.0532384	0.701052		0.0532384	0.0373229	0.701052		2.90113	0.154378	0.108298	0.0532131	0.701509		0.0532131	0.0373295	0.701509
54	3.43298	0.182624	0.127989	0.0531971	0.700832		0.0531971	0.0372823	0.700832		2.90629	0.154683	0.108483	0.0532235	0.701325		0.0532235	0.037327	0.701325		3.11296	0.165694	0.116069	0.0532273	0.700498		0.0532273	0.0372856	0.700498
55	3.67172	0.19538	0.136875	0.053212	0.700557		0.053212	0.037278	0.700557		3.07637	0.163764	0.114734	0.0532329	0.700606		0.0532329	0.0372953	0.700606		3.00164	0.159781	0.11184	0.0532312	0.699959		0.0532312	0.0372597	0.699959
56	3.9504	0.2165	0.151418	0.0548044	0.699392		0.0548044	0.0383298	0.699392		2.85504	0.152052	0.106593	0.0532573	0.701029		0.0532573	0.0373349	0.701029		2.89464	0.154106	0.108094	0.0532384	0.701429		0.0532384	0.0373429	0.701429
57	2.91293	0.155175	0.108777	0.0532712	0.700992		0.0532712	0.0373427	0.700992		2.7483	0.146264	0.102553	0.0532198	0.701151		0.0532198	0.0373152	0.701151		2.97289	0.158189	0.110835	0.0532105	0.70065		0.0532105	0.0372819	0.70065
58	2.58164	0.137407	0.0964631	0.0532247	0.702024		0.0532247	0.037365	0.702024		3.07855	0.163857	0.114784	0.0532255	0.700511		0.0532255	0.037285	0.700511		2.98689	0.158991	0.111468	0.0532297	0.701096		0.0532297	0.0373191	0.701096
59	3.29277	0.175133	0.122695	0.0531872	0.700583		0.0531872	0.0372621	0.700583		3.17398	0.168976	0.118265	0.053238	0.69989		0.053238	0.0372607	0.69989		4.08593	0.217466	0.152069	0.0532233	0.699274		0.0532233	0.0372177	0.699274
60	3.07969	0.163922	0.114834	0.0532267	0.700544		0.0532267	0.0372876	0.700544		2.68326	0.142936	0.100162	0.0532695	0.700744		0.0532695	0.0373283	0.700744		3.35293	0.17842	0.124873	0.0532131	0.699883		0.0532131	0.0372429	0.699883
***	L4	C	H4	C | L4	H4 | C						L4	C	H4	C | L4	H4 | C						L4	C	H4	C | L4	H4 | C
***	tbdgy	tbdgy	tbdgy	tbdgy - St	tbdgy - St						tbdgy	tbdgy	tbdgy	tbdgy - St	tbdgy - St						tbdgy	tbdgy	tbdgy	tbdgy - St	tbdgy - St
***	2.55	0.137352	0.0964339	0.0537121	0.724262	av	0.053823	0.0377763	0.701897		2.46101	0.133758	0.094263	0.0543169	0.726093	av	0.0545663	0.0384427	0.703789		2.44521	0.130502	0.0916546	0.0533205	0.725299	av	0.0533829	0.0374786	0.702073
***	5.1173	5.24024	5.18033	0.691673	1.33725	stabw	0.00314386	0.00216333	0.00173027		5.16376	5.2157	5.22486	1.16317	1.3527	stabw	0.00533285	0.00440711	0.0116141		5.51888	5.51901	5.45429	0.156853	1.39318	stabw	0.000684485	0.000474627	0.00146536
***	0.130491	0.0071976	0.0049956	0.000371512	0.0096852	stabw/(n)^0.5	0.000444609	0.000305941	0.000244698		0.127081	0.00697643	0.00492511	0.000631795	0.00982185	stabw/(n)^0.5	0.000754179	0.00062326	0.00164248		0.134948	0.00720243	0.0049991	8.36346e-05	0.0101048	stabw/(n)^0.5	9.68008e-05	6.71223e-05	0.000207234
***	39.6385	40.5907	40.1267	5.35768	10.3583	(stabw/(n)^0.5)/av /%	0.00826057	0.00809875	0.000348623		39.9983	40.4007	40.4716	9.00984	10.478	(stabw/(n)^0.5)/av /%	0.0138213	0.0162127	0.00233377		42.7491	42.7501	42.2487	1.21498	10.7916	(stabw/(n)^0.5)/av /%	0.00181333	0.00179095	0.000295174
***	1.01078	0.0557523	0.0386957	0.00287772	0.0750213						0.984364	0.0540392	0.0381497	0.00489386	0.0760797						1.04531	0.0557898	0.0387229	0.000647831	0.0782711
	11.4466	0.628514	0.437263	0.00104151	0.0839318
	WASO04 Laserablation spot size 20 µm
	1st run						not blank corr				2nd run						not blank corr				3rd run						not blank corr
Cycle	27.94	28.925	29.916	28.925/27.94 (1)	29.916/28.925 (2)		29/28	30/28	30/29		27.94	28.925	29.916	28.925/27.94 (1)	29.916/28.925 (2)		29/28	30/28	30/29		27.94	28.925	29.916	28.925/27.94 (1)	29.916/28.925 (2)		29/28	30/28	30/29
11	8.52137	0.454465	0.316783	0.0533324	0.697047		0.0533324	0.0371752	0.697047		11.677	0.621997	0.433183	0.053267	0.696439		0.053267	0.0370972	0.696439		9.15588	0.487849	0.339784	0.0532826	0.696494		0.0532826	0.037111	0.696494
12	8.39611	0.447167	0.311739	0.0532588	0.697142		0.0532588	0.0371289	0.697142		10.9866	0.585824	0.408326	0.0533216	0.697012		0.0533216	0.0371658	0.697012		10.0699	0.53826	0.375187	0.0534523	0.697037		0.0534523	0.0372582	0.697037
13	7.20967	0.383967	0.267723	0.0532573	0.697254		0.0532573	0.0371339	0.697254		10.6099	0.565092	0.393568	0.0532606	0.696467		0.0532606	0.0370943	0.696467		10.1219	0.539154	0.375579	0.0532664	0.696607		0.0532664	0.0371057	0.696607
14	8.17067	0.435128	0.303417	0.0532549	0.697306		0.0532549	0.0371349	0.697306		9.83233	0.523615	0.364775	0.0532544	0.696649		0.0532544	0.0370996	0.696649		9.94502	0.530828	0.369835	0.0533763	0.696715		0.0533763	0.037188	0.696715
15	8.20105	0.436815	0.304567	0.0532633	0.697244		0.0532633	0.0371375	0.697244		10.294	0.549141	0.382557	0.0533457	0.696646		0.0533457	0.037163	0.696646		8.73484	0.465126	0.324222	0.0532495	0.697063		0.0532495	0.0371182	0.697063
16	7.8594	0.418376	0.291785	0.0532326	0.697423		0.0532326	0.0371256	0.697423		10.4238	0.555075	0.38665	0.0532507	0.696571		0.0532507	0.0370929	0.696571		9.42479	0.502552	0.350073	0.0533223	0.696591		0.0533223	0.0371438	0.696591
17	8.20552	0.437068	0.304681	0.0532652	0.697102		0.0532652	0.0371313	0.697102		10.6581	0.567897	0.395405	0.0532829	0.696262		0.0532829	0.0370988	0.696262		9.8102	0.534932	0.372712	0.0545282	0.696746		0.0545282	0.0379923	0.696746
18	8.8335	0.471216	0.328552	0.0533442	0.697243		0.0533442	0.0371939	0.697243		9.63832	0.513308	0.357608	0.053257	0.696673		0.053257	0.0371027	0.696673		11.0349	0.595325	0.414392	0.053949	0.696077		0.053949	0.0375527	0.696077
19	8.82448	0.470311	0.327785	0.0532962	0.696954		0.0532962	0.037145	0.696954		9.87334	0.525894	0.366447	0.053264	0.696809		0.053264	0.0371148	0.696809		10.697	0.569637	0.396865	0.0532519	0.696699		0.0532519	0.0371005	0.696699
20	8.32472	0.454431	0.31686	0.0545881	0.697269		0.0545881	0.0380626	0.697269		11.0161	0.586403	0.408359	0.0532317	0.696379		0.0532317	0.0370694	0.696379		10.02	0.533515	0.371764	0.0532448	0.696821		0.0532448	0.0371021	0.696821
21	8.38618	0.446615	0.311236	0.053256	0.696878		0.053256	0.0371129	0.696878		10.4176	0.554831	0.386512	0.0532593	0.69663		0.0532593	0.037102	0.69663		10.0612	0.53569	0.37307	0.0532429	0.696429		0.0532429	0.0370799	0.696429
22	8.53508	0.454608	0.316749	0.0532635	0.696752		0.0532635	0.0371114	0.696752		11.527	0.617441	0.429917	0.0535646	0.696288		0.0535646	0.0372964	0.696288		9.47378	0.53635	0.373502	0.0566142	0.696377		0.0566142	0.0394248	0.696377
23	8.9924	0.478959	0.333832	0.0532626	0.696995		0.0532626	0.0371238	0.696995		11.8881	0.636914	0.443586	0.0535756	0.696461		0.0535756	0.0373133	0.696461		9.91049	0.530945	0.369674	0.0535741	0.696257		0.0535741	0.0373013	0.696257
24	8.08374	0.455132	0.317063	0.0563022	0.69664		0.0563022	0.0392223	0.69664		10.9932	0.585632	0.40781	0.0532722	0.69636		0.0532722	0.0370966	0.69636		11.8349	0.709633	0.493562	0.0599611	0.695518		0.0599611	0.0417041	0.695518
25	8.427	0.448647	0.312778	0.0532393	0.697158		0.0532393	0.0371162	0.697158		10.6627	0.567571	0.395387	0.0532295	0.696629		0.0532295	0.0370813	0.696629		11.0582	0.588965	0.410009	0.0532606	0.696152		0.0532606	0.0370775	0.696152
26	9.127	0.508457	0.354247	0.0557092	0.696709		0.0557092	0.0388131	0.696709		11.3239	0.602936	0.419774	0.0532447	0.696217		0.0532447	0.0370699	0.696217		10.1232	0.542155	0.377621	0.0535559	0.696519		0.0535559	0.0373027	0.696519
27	8.96927	0.477579	0.332809	0.0532462	0.696866		0.0532462	0.0371054	0.696866		11.4269	0.608712	0.424042	0.0532699	0.696622		0.0532699	0.037109	0.696622		9.39204	0.500274	0.348477	0.0532657	0.696573		0.0532657	0.0371034	0.696573
28	8.39036	0.447103	0.311596	0.0532878	0.696921		0.0532878	0.0371374	0.696921		12.147	0.647038	0.450507	0.0532674	0.69626		0.0532674	0.037088	0.69626		11.1562	0.625589	0.435483	0.0560756	0.696117		0.0560756	0.0390352	0.696117
29	8.50459	0.452804	0.315647	0.0532423	0.697094		0.0532423	0.0371149	0.697094		11.3538	0.604529	0.420874	0.0532447	0.696201		0.0532447	0.037069	0.696201		10.4878	0.558534	0.389084	0.0532553	0.696618		0.0532553	0.0370986	0.696618
30	8.23781	0.438908	0.306011	0.0532797	0.69721		0.0532797	0.0371472	0.69721		10.5195	0.560067	0.390147	0.0532411	0.696607		0.0532411	0.0370881	0.696607		10.6448	0.621032	0.432391	0.0583413	0.696245		0.0583413	0.0406198	0.696245
31	9.0629	0.48271	0.336184	0.0532622	0.69645		0.0532622	0.0370945	0.69645		11.5313	0.614115	0.427537	0.0532566	0.696184		0.0532566	0.0370764	0.696184		11.0546	0.630194	0.438551	0.0570072	0.695899		0.0570072	0.0396713	0.695899
32	9.57794	0.509923	0.355196	0.0532393	0.696568		0.0532393	0.0370848	0.696568		9.88773	0.526669	0.366706	0.0532649	0.696274		0.0532649	0.037087	0.696274		8.83414	0.470529	0.32788	0.0532626	0.696833		0.0532626	0.0371151	0.696833
33	9.28839	0.494416	0.344479	0.0532295	0.696739		0.0532295	0.0370871	0.696739		10.5495	0.561675	0.391071	0.0532417	0.69626		0.0532417	0.0370701	0.69626		9.17056	0.488336	0.340173	0.0532504	0.696596		0.0532504	0.037094	0.696596
34	10.2729	0.546892	0.380906	0.0532366	0.696492		0.0532366	0.0370789	0.696492		10.5536	0.562023	0.391405	0.053254	0.696421		0.053254	0.0370872	0.696421		9.65585	0.514183	0.358126	0.0532509	0.696495		0.0532509	0.037089	0.696495
35	9.40835	0.500903	0.348817	0.0532403	0.696376		0.0532403	0.0370752	0.696376		11.2278	0.599596	0.417374	0.0534028	0.696093		0.0534028	0.0371734	0.696093		9.56436	0.509215	0.35482	0.0532409	0.696799		0.0532409	0.0370982	0.696799
36	8.64846	0.460282	0.320666	0.0532213	0.696672		0.0532213	0.0370778	0.696672		11.3273	0.607766	0.423154	0.053655	0.696245		0.053655	0.037357	0.696245		9.24433	0.492317	0.342868	0.0532561	0.696438		0.0532561	0.0370896	0.696438
37	9.07948	0.535249	0.372647	0.0589515	0.696212		0.0589515	0.0410427	0.696212		10.6778	0.570165	0.396818	0.053397	0.69597		0.053397	0.0371627	0.69597		9.22946	0.493699	0.344005	0.0534916	0.696792		0.0534916	0.0372725	0.696792
38	8.64287	0.462776	0.32238	0.0535442	0.696623		0.0535442	0.0373001	0.696623		9.94329	0.52964	0.368894	0.0532661	0.696499		0.0532661	0.0370997	0.696499		8.66901	0.461693	0.321625	0.0532579	0.696621		0.0532579	0.0371006	0.696621
39	8.5367	0.455539	0.317439	0.0533625	0.696842		0.0533625	0.0371852	0.696842		10.3623	0.551539	0.384281	0.0532258	0.696743		0.0532258	0.0370847	0.696743		9.16244	0.503815	0.350912	0.054987	0.696509		0.054987	0.038299	0.696509
40	9.01916	0.480064	0.334529	0.0532272	0.696842		0.0532272	0.037091	0.696842		12.7107	0.679029	0.472634	0.0534217	0.696044		0.0534217	0.0371839	0.696044		10.2459	0.545609	0.380109	0.0532514	0.69667		0.0532514	0.0370986	0.69667
41	9.18032	0.488843	0.340573	0.053249	0.696693		0.053249	0.0370982	0.696693		11.5641	0.615986	0.428889	0.053267	0.696264		0.053267	0.0370879	0.696264		11.8107	0.631978	0.43994	0.0535088	0.696131		0.0535088	0.0372492	0.696131
42	10.4135	0.554381	0.385875	0.0532368	0.696046		0.0532368	0.0370552	0.696046		11.1064	0.59139	0.411829	0.0532474	0.696375		0.0532474	0.0370802	0.696375		11.9916	0.645852	0.449577	0.0538589	0.696099		0.0538589	0.0374912	0.696099
43	9.48727	0.505747	0.352166	0.053308	0.696329		0.053308	0.0371199	0.696329		11.2313	0.598564	0.41672	0.0532943	0.6962		0.0532943	0.0371035	0.6962		11.9108	0.634165	0.441526	0.053243	0.696231		0.053243	0.0370694	0.696231
44	10.5114	0.566251	0.394259	0.0538702	0.696262		0.0538702	0.0375078	0.696262		10.8453	0.577618	0.402085	0.0532596	0.696109		0.0532596	0.0370745	0.696109		12.0927	0.643928	0.448271	0.0532491	0.69615		0.0532491	0.0370694	0.69615
45	10.1309	0.539265	0.37553	0.0532297	0.696374		0.0532297	0.0370678	0.696374		11.2594	0.599655	0.417369	0.0532583	0.696015		0.0532583	0.0370685	0.696015		11.661	0.621236	0.432572	0.0532745	0.696308		0.0532745	0.0370955	0.696308
46	10.0594	0.53667	0.373701	0.0533501	0.696332		0.0533501	0.0371494	0.696332		19.6175	1.36166	0.945364	0.0694107	0.694272		0.0694107	0.0481899	0.694272		10.4496	0.556921	0.387831	0.0532958	0.696383		0.0532958	0.0371143	0.696383
47	8.92533	0.475526	0.331245	0.0532782	0.696587		0.0532782	0.0371129	0.696587		13.5639	0.722358	0.502848	0.0532561	0.696121		0.0532561	0.0370727	0.696121		10.3342	0.553828	0.385621	0.0535916	0.696283		0.0535916	0.0373149	0.696283
48	9.8844	0.526215	0.366442	0.053237	0.696372		0.053237	0.0370727	0.696372		13.5273	0.723568	0.503436	0.0534894	0.695769		0.0534894	0.0372163	0.695769		11.0629	0.58911	0.410241	0.053251	0.696375		0.053251	0.0370827	0.696375
49	8.68394	0.462493	0.322167	0.0532584	0.696588		0.0532584	0.0370992	0.696588		11.5464	0.615	0.427925	0.0532632	0.695813		0.0532632	0.0370612	0.695813		11.5658	0.61986	0.43166	0.0535941	0.696383		0.0535941	0.037322	0.696383
50	9.22374	0.492154	0.342705	0.0533573	0.696337		0.0533573	0.0371546	0.696337		11.4969	0.612053	0.426104	0.0532366	0.696188		0.0532366	0.0370626	0.696188		10.867	0.580983	0.404392	0.053463	0.696048		0.053463	0.0372128	0.696048
51	9.16082	0.48791	0.339847	0.0532605	0.696536		0.0532605	0.0370979	0.696536		10.3682	0.552133	0.384603	0.0532524	0.696577		0.0532524	0.0370944	0.696577		11.1511	0.597002	0.415723	0.0535376	0.696352		0.0535376	0.037281	0.696352
52	8.78977	0.468137	0.32594	0.0532593	0.696251		0.0532593	0.0370818	0.696251		9.93661	0.529125	0.368469	0.05325	0.696375		0.05325	0.037082	0.696375		11.3308	0.603796	0.420442	0.0532879	0.696331		0.0532879	0.037106	0.696331
53	8.26236	0.440038	0.306744	0.0532581	0.697085		0.0532581	0.0371254	0.697085		12.3596	0.658343	0.458139	0.0532658	0.695898		0.0532658	0.0370676	0.695898		10.3262	0.549854	0.382914	0.0532485	0.696391		0.0532485	0.0370818	0.696391
54	8.92613	0.475221	0.331191	0.0532393	0.696919		0.0532393	0.0371035	0.696919		11.1936	0.597005	0.415435	0.0533346	0.695866		0.0533346	0.0371137	0.695866		12.5023	0.666233	0.463669	0.0532891	0.695955		0.0532891	0.0370868	0.695955
55	9.41114	0.502751	0.350164	0.0534208	0.696497		0.0534208	0.0372074	0.696497		11.6996	0.622731	0.433503	0.0532269	0.696132		0.0532269	0.0370529	0.696132		12.7752	0.746686	0.519381	0.0584479	0.695581		0.0584479	0.0406553	0.695581
56	9.5197	0.507602	0.353758	0.0533213	0.69692		0.0533213	0.0371607	0.69692		10.1665	0.542204	0.377524	0.0533326	0.696277		0.0533326	0.0371342	0.696277		10.6498	0.567068	0.394728	0.053247	0.696087		0.053247	0.0370645	0.696087
57	8.24457	0.438839	0.305814	0.0532276	0.696871		0.0532276	0.0370928	0.696871		9.37852	0.499461	0.347917	0.0532558	0.696585		0.0532558	0.0370972	0.696585		10.4591	0.556985	0.387748	0.0532534	0.696155		0.0532534	0.0370726	0.696155
58	9.54484	0.508409	0.354086	0.0532654	0.696459		0.0532654	0.0370971	0.696459		10.2982	0.54849	0.382002	0.053261	0.696462		0.053261	0.0370942	0.696462		9.03121	0.480756	0.334976	0.0532328	0.696768		0.0532328	0.0370909	0.696768
59	8.59859	0.457991	0.319062	0.0532635	0.696657		0.0532635	0.0371064	0.696657		11.7579	0.696405	0.484551	0.0592286	0.69579		0.0592286	0.0412106	0.69579		10.393	0.553477	0.385461	0.0532548	0.696436		0.0532548	0.0370885	0.696436
60	9.05931	0.482395	0.336127	0.0532485	0.696789		0.0532485	0.037103	0.696789		11.7635	0.626471	0.43616	0.0532554	0.696217		0.0532554	0.0370773	0.696217		8.55975	0.455887	0.317627	0.0532594	0.696723		0.0532594	0.037107	0.696723
***	L4	C	H4	C | L4	H4 | C						L4	C	H4	C | L4	H4 | C						L4	C	H4	C | L4	H4 | C
***	tbdgy	tbdgy	tbdgy	tbdgy - St	tbdgy - St						tbdgy	tbdgy	tbdgy	tbdgy - St	tbdgy - St						tbdgy	tbdgy	tbdgy	tbdgy - St	tbdgy - St
***	8.18554	0.437991	0.305283	0.0534542	0.720115	av	0.0535367	0.0373021	0.696758		10.2299	0.551703	0.384233	0.0536305	0.719961	av	0.0537387	0.0374167	0.696284		9.5011	0.512316	0.356887	0.0538092	0.719619	av	0.0539343	0.0375601	0.69641
***	4.17274	4.17685	4.16025	0.220452	1.39521	stabw	0.000970174	0.000672159	0.000341046		4.41846	4.80478	4.78728	0.53388	1.41505	stabw	0.00241385	0.0016603	0.000400525		4.23812	4.29233	4.27761	0.342379	1.38956	stabw	0.00152699	0.00105281	0.00032519
***	0.341561	0.0182942	0.0127005	0.000117841	0.0100471	stabw/(n)^0.5	0.000137203	9.50576e-05	4.82312e-05		0.452002	0.0265081	0.0183943	0.000286323	0.0101878	stabw/(n)^0.5	0.000341369	0.000234801	5.66429e-05		0.402668	0.0219903	0.0152662	0.000184231	0.00999951	stabw/(n)^0.5	0.000215949	0.00014889	4.59888e-05
***	32.3219	32.3537	32.2251	1.70761	10.8072	(stabw/(n)^0.5)/av /%	0.00256279	0.00254832	6.92223e-05		34.2252	37.2177	37.0821	4.13542	10.9609	(stabw/(n)^0.5)/av /%	0.00635239	0.00627531	8.13502e-05		32.8284	33.2482	33.1342	2.65205	10.7635	(stabw/(n)^0.5)/av /%	0.00400392	0.00396406	6.6037e-05
***	2.64572	0.141706	0.0983777	0.000912792	0.0778245						3.50119	0.205331	0.142482	0.00221784	0.0789144						3.11905	0.170336	0.118252	0.00142705	0.0774559
	WASO04 Laserablation spot size 40 µm
	1st run						not blank corr				2nd run						not blank corr				3rd run						not blank corr
Cycle	27.94	28.925	29.916	28.925/27.94 (1)	29.916/28.925 (2)		29/28	30/28	30/29		27.94	28.925	29.916	28.925/27.94 (1)	29.916/28.925 (2)		29/28	30/28	30/29		27.94	28.925	29.916	28.925/27.94 (1)	29.916/28.925 (2)		29/28	30/28	30/29
11	43.169	2.32816	1.61775	0.0539312	0.694861		0.0539312	0.0374747	0.694861		33.2864	1.86859	1.29895	0.0561368	0.69515		0.0561368	0.0390235	0.69515		27.5769	1.4786	1.02859	0.0536172	0.695656		0.0536172	0.0372991	0.695656
12	40.6931	2.19498	1.52541	0.0539398	0.694954		0.0539398	0.0374857	0.694954		29.1392	1.559	1.08363	0.0535018	0.695085		0.0535018	0.0371883	0.695085		25.4784	1.36531	0.949444	0.053587	0.695405		0.053587	0.0372647	0.695405
13	43.9575	2.36409	1.64344	0.0537813	0.695169		0.0537813	0.0373871	0.695169		29.4353	1.6001	1.11236	0.05436	0.695178		0.05436	0.0377899	0.695178		28.7707	1.53749	1.06933	0.0534394	0.695504		0.0534394	0.0371674	0.695504
14	44.4972	2.39203	1.66214	0.0537569	0.694864		0.0537569	0.0373537	0.694864		26.0877	1.40013	0.973781	0.0536701	0.695494		0.0536701	0.0373272	0.695494		30.3	1.74814	1.21504	0.0576945	0.695044		0.0576945	0.0401002	0.695044
15	38.9142	2.13361	1.48263	0.0548286	0.694891		0.0548286	0.0380999	0.694891		27.1251	1.45849	1.01379	0.0537691	0.695094		0.0537691	0.0373746	0.695094		29.5438	1.57893	1.09801	0.0534436	0.695412		0.0534436	0.0371653	0.695412
16	47.4877	2.61013	1.81377	0.0549644	0.694896		0.0549644	0.0381945	0.694896		28.8178	1.53795	1.06939	0.0533682	0.695332		0.0533682	0.0371086	0.695332		27.773	1.48117	1.02983	0.0533313	0.695284		0.0533313	0.0370804	0.695284
17	45.1394	2.41318	1.67706	0.0534606	0.694959		0.0534606	0.0371529	0.694959		29.5338	1.5771	1.09651	0.0533999	0.695266		0.0533999	0.0371271	0.695266		28.7239	1.54273	1.07253	0.0537091	0.695213		0.0537091	0.0373392	0.695213
18	45.8116	2.5017	1.7383	0.0546084	0.694847		0.0546084	0.0379445	0.694847		30.4956	1.62655	1.1309	0.0533373	0.695275		0.0533373	0.0370841	0.695275		26.2348	1.46781	1.0211	0.0559491	0.695657		0.0559491	0.0389214	0.695657
19	46.9704	2.51727	1.74908	0.0535927	0.694833		0.0535927	0.037238	0.694833		30.4233	1.6254	1.13024	0.053426	0.695363		0.053426	0.0371505	0.695363		27.5376	1.59327	1.10747	0.057858	0.695094		0.057858	0.0402168	0.695094
20	47.1296	2.54036	1.76497	0.0539015	0.694772		0.0539015	0.0374493	0.694772		30.4684	1.62696	1.13108	0.0533983	0.695212		0.0533983	0.0371231	0.695212		26.1382	1.3936	0.969136	0.0533165	0.695421		0.0533165	0.0370774	0.695421
21	43.8079	2.35748	1.63832	0.053814	0.694947		0.053814	0.0373979	0.694947		33.7208	1.82255	1.26689	0.0540483	0.695119		0.0540483	0.0375701	0.695119		25.9003	1.47066	1.0222	0.0567814	0.69506		0.0567814	0.0394665	0.69506
22	46.1724	2.46736	1.7146	0.0534381	0.694912		0.0534381	0.0371347	0.694912		34.1171	1.88104	1.30705	0.0551348	0.694858		0.0551348	0.0383108	0.694858		21.7819	1.16305	0.808854	0.0533951	0.695461		0.0533951	0.0371342	0.695461
23	45.2598	2.41852	1.68041	0.0534364	0.694807		0.0534364	0.037128	0.694807		32.6948	1.78198	1.23875	0.0545035	0.695156		0.0545035	0.0378884	0.695156		21.4085	1.14648	0.797506	0.0535526	0.695613		0.0535526	0.0372519	0.695613
24	46.6528	2.50378	1.73964	0.0536685	0.694804		0.0536685	0.0372891	0.694804		32.1565	1.71416	1.19146	0.0533067	0.695072		0.0533067	0.037052	0.695072		22.3644	1.22483	0.852242	0.0547668	0.695806		0.0547668	0.0381071	0.695806
25	43.5326	2.32294	1.61413	0.0533609	0.694866		0.0533609	0.0370787	0.694866		33.9866	1.81052	1.25851	0.0532716	0.695109		0.0532716	0.0370296	0.695109		21.8434	1.26209	0.876862	0.0577789	0.694769		0.0577789	0.040143	0.694769
26	40.4431	2.18936	1.52126	0.0541345	0.694843		0.0541345	0.037615	0.694843		34.2983	1.84315	1.28138	0.0537387	0.695211		0.0537387	0.0373597	0.695211		21.1055	1.12409	0.781862	0.0532606	0.695549		0.0532606	0.0370453	0.695549
27	36.8473	2.02587	1.4075	0.0549802	0.694765		0.0549802	0.0381983	0.694765		34.5398	1.84939	1.28524	0.0535439	0.694954		0.0535439	0.0372105	0.694954		22.8467	1.22176	0.849736	0.0534762	0.695504		0.0534762	0.0371929	0.695504
28	39.1189	2.1144	1.46922	0.0540507	0.694861		0.0540507	0.0375577	0.694861		29.6225	1.66236	1.15868	0.0561183	0.697009		0.0561183	0.0391149	0.697009		21.0771	1.12312	0.781262	0.0532863	0.695617		0.0532863	0.0370669	0.695617
29	36.6512	1.95809	1.36073	0.0534251	0.694928		0.0534251	0.0371266	0.694928		31.2574	1.83057	1.27555	0.0585643	0.696803		0.0585643	0.0408078	0.696803		22.7659	1.21503	0.845367	0.0533705	0.69576		0.0533705	0.0371331	0.69576
30	43.4022	2.33714	1.62395	0.0538484	0.694844		0.0538484	0.0374162	0.694844		28.1063	1.5412	1.07139	0.0548347	0.695163		0.0548347	0.0381191	0.695163		23.3775	1.38937	0.965589	0.0594317	0.694986		0.0594317	0.0413042	0.694986
31	44.4084	2.39598	1.66415	0.0539533	0.69456		0.0539533	0.0374738	0.69456		27.5553	1.46867	1.02079	0.0532989	0.695042		0.0532989	0.037045	0.695042		20.2581	1.08059	0.751358	0.0533412	0.695321		0.0533412	0.0370892	0.695321
32	38.1346	2.03242	1.4118	0.053296	0.694641		0.053296	0.0370216	0.694641		28.4742	1.5167	1.05468	0.0532659	0.695379		0.0532659	0.03704	0.695379		19.3049	1.0693	0.743582	0.0553901	0.695389		0.0553901	0.0385177	0.695389
33	36.3455	1.93897	1.34792	0.0533483	0.695173		0.0533483	0.0370863	0.695173		29.5382	1.57385	1.0941	0.0532819	0.695177		0.0532819	0.0370403	0.695177		19.1363	1.05266	0.732117	0.0550087	0.695492		0.0550087	0.0382581	0.695492
34	41.2343	2.21901	1.54202	0.0538147	0.694911		0.0538147	0.0373965	0.694911		27.0388	1.54247	1.07191	0.0570464	0.694931		0.0570464	0.0396433	0.694931		20.5828	1.0959	0.762308	0.0532434	0.695601		0.0532434	0.0370361	0.695601
35	42.2285	2.25373	1.56609	0.0533699	0.694889		0.0533699	0.0370861	0.694889		26.5004	1.43636	0.998559	0.0542014	0.695201		0.0542014	0.0376809	0.695201		23.375	1.24485	0.865806	0.0532559	0.695508		0.0532559	0.0370399	0.695508
36	39.1332	2.12512	1.47629	0.0543048	0.694686		0.0543048	0.0377248	0.694686		27.0226	1.44009	1.00127	0.053292	0.695286		0.053292	0.0370532	0.695286		22.3947	1.1925	0.829242	0.0532493	0.695379		0.0532493	0.0370284	0.695379
37	41.4172	2.21406	1.53848	0.0534575	0.694871		0.0534575	0.0371461	0.694871		27.9777	1.50007	1.04285	0.0536167	0.695199		0.0536167	0.0372743	0.695199		23.1418	1.23327	0.857957	0.0532919	0.695676		0.0532919	0.0370739	0.695676
38	41.7361	2.3847	1.65622	0.0571377	0.694519		0.0571377	0.0396832	0.694519		25.0972	1.34222	0.933304	0.0534807	0.695344		0.0534807	0.0371875	0.695344		22.618	1.20461	0.837586	0.0532588	0.695318		0.0532588	0.0370318	0.695318
39	32.4243	1.73035	1.20241	0.0533659	0.694895		0.0533659	0.0370837	0.694895		25.9597	1.38607	0.963901	0.053393	0.695422		0.053393	0.0371307	0.695422		20.9425	1.13509	0.789241	0.0542002	0.695311		0.0542002	0.037686	0.695311
40	32.3769	1.73466	1.20551	0.0535773	0.694955		0.0535773	0.0372338	0.694955		32.5713	2.09068	1.45344	0.0641879	0.6952		0.0641879	0.0446234	0.6952		23.4615	1.3907	0.966486	0.0592758	0.694964		0.0592758	0.0411946	0.694964
41	30.9967	1.65049	1.14704	0.0532472	0.694971		0.0532472	0.0370053	0.694971		31.5385	1.82076	1.26344	0.0577313	0.693907		0.0577313	0.0400602	0.693907		22.045	1.2243	0.851044	0.0555365	0.695127		0.0555365	0.0386049	0.695127
42	36.7408	1.95829	1.36092	0.0533002	0.694952		0.0533002	0.037041	0.694952		29.1102	1.57077	1.09201	0.0539595	0.695205		0.0539595	0.0375129	0.695205		19.0804	1.02346	0.711574	0.0536392	0.695264		0.0536392	0.0372934	0.695264
43	33.5123	1.79351	1.24653	0.0535179	0.695023		0.0535179	0.0371962	0.695023		28.2583	1.56963	1.09077	0.0555457	0.694923		0.0555457	0.0386	0.694923		18.6115	1.02817	0.714866	0.0552438	0.69528		0.0552438	0.0384099	0.69528
44	30.9858	1.69213	1.17547	0.0546099	0.694668		0.0546099	0.0379357	0.694668		27.3525	1.54103	1.07138	0.0563395	0.695234		0.0563395	0.0391692	0.695234		19.1282	1.02084	0.710032	0.0533685	0.695533		0.0533685	0.0371196	0.695533
45	34.7911	1.87579	1.30362	0.0539157	0.694973		0.0539157	0.03747	0.694973		29.6481	1.63209	1.13434	0.055049	0.695021		0.055049	0.0382602	0.695021		21.1125	1.13788	0.79142	0.0538962	0.695519		0.0538962	0.0374859	0.695519
46	31.5008	1.69391	1.17723	0.0537735	0.694976		0.0537735	0.0373713	0.694976		29.3223	1.56222	1.08565	0.0532776	0.694937		0.0532776	0.0370246	0.694937		21.7266	1.16992	0.813495	0.0538472	0.695344		0.0538472	0.0374423	0.695344
47	35.7731	1.90923	1.32707	0.0533705	0.695082		0.0533705	0.0370969	0.695082		27.3964	1.48648	1.0334	0.0542581	0.695203		0.0542581	0.0377204	0.695203		20.7802	1.18386	0.831809	0.0569706	0.702623		0.0569706	0.0400288	0.702623
48	35.8114	1.90873	1.32622	0.0532995	0.694818		0.0532995	0.0370335	0.694818		29.7891	1.66268	1.16312	0.0558151	0.699546		0.0558151	0.0390452	0.699546		19.056	1.0144	0.705658	0.0532329	0.695639		0.0532329	0.0370308	0.695639
49	37.0578	1.9871	1.38157	0.0536218	0.695268		0.0536218	0.0372815	0.695268		27.731	1.47878	1.02795	0.0533258	0.695137		0.0533258	0.0370687	0.695137		19.3807	1.03173	0.717629	0.053235	0.695558		0.053235	0.037028	0.695558
50	35.1374	1.92932	1.34078	0.0549079	0.694951		0.0549079	0.0381583	0.694951		30.5803	1.89735	1.32066	0.0620449	0.696051		0.0620449	0.0431864	0.696051		20.8566	1.14028	0.792939	0.0546723	0.695391		0.0546723	0.0380186	0.695391
51	34.455	1.85311	1.28759	0.0537836	0.694826		0.0537836	0.0373702	0.694826		27.7967	1.48131	1.02955	0.053291	0.695023		0.053291	0.0370385	0.695023		20.8213	1.11001	0.772131	0.0533112	0.695607		0.0533112	0.0370837	0.695607
52	31.1367	1.6609	1.15428	0.0533424	0.694972		0.0533424	0.0370715	0.694972		28.9795	1.62412	1.12849	0.0560438	0.694834		0.0560438	0.0389412	0.694834		19.4766	1.08175	0.752196	0.0555411	0.695349		0.0555411	0.0386204	0.695349
53	33.0477	1.75979	1.22315	0.0532499	0.695056		0.0532499	0.0370117	0.695056		24.9306	1.3273	0.922776	0.0532398	0.695228		0.0532398	0.0370138	0.695228		18.4607	0.983059	0.683739	0.0532514	0.695522		0.0532514	0.0370375	0.695522
54	34.3327	1.8317	1.27271	0.0533516	0.694825		0.0533516	0.03707	0.694825		25.0274	1.33901	0.931081	0.0535018	0.695351		0.0535018	0.0372025	0.695351		18.5845	0.992449	0.69038	0.0534019	0.695632		0.0534019	0.0371481	0.695632
55	34.7759	1.8532	1.28799	0.0532899	0.69501		0.0532899	0.037037	0.69501		26.7509	1.44815	1.00664	0.0541344	0.695124		0.0541344	0.0376301	0.695124		19.9145	1.06338	0.739637	0.0533974	0.695551		0.0533974	0.0371406	0.695551
56	36.4532	1.97601	1.37291	0.0542068	0.694787		0.0542068	0.0376622	0.694787		26.8612	1.43115	0.994771	0.0532796	0.695083		0.0532796	0.0370338	0.695083		21.2502	1.14546	0.796487	0.0539032	0.695345		0.0539032	0.0374814	0.695345
57	34.4767	1.85242	1.28704	0.0537294	0.694788		0.0537294	0.0373306	0.694788		26.2456	1.40316	0.975125	0.0534626	0.694951		0.0534626	0.0371539	0.694951		19.7281	1.16085	0.807164	0.0588424	0.695322		0.0588424	0.0409144	0.695322
58	34.5053	1.8384	1.2777	0.0532788	0.695004		0.0532788	0.037029	0.695004		26.8161	1.43529	0.99801	0.0535235	0.695337		0.0535235	0.0372168	0.695337		20.4527	1.09186	0.759263	0.0533848	0.695384		0.0533848	0.0371229	0.695384
59	30.8874	1.65852	1.15252	0.0536958	0.694908		0.0536958	0.0373136	0.694908		27.3371	1.46028	1.01511	0.0534176	0.695144		0.0534176	0.037133	0.695144		21.7136	1.16377	0.80946	0.0535963	0.695551		0.0535963	0.0372789	0.695551
60	27.9062	1.48587	1.03314	0.0532451	0.69531		0.0532451	0.0370219	0.69531		28.5279	1.52128	1.05747	0.0533261	0.695118		0.0533261	0.0370679	0.695118		22.033	1.18803	0.826284	0.0539205	0.695506		0.0539205	0.0375021	0.695506
***	L4	C	H4	C | L4	H4 | C						L4	C	H4	C | L4	H4 | C						L4	C	H4	C | L4	H4 | C
***	tbdgy	tbdgy	tbdgy	tbdgy - St	tbdgy - St						tbdgy	tbdgy	tbdgy	tbdgy - St	tbdgy - St						tbdgy	tbdgy	tbdgy	tbdgy - St	tbdgy - St
***	35.6067	1.93005	1.34132	0.0540096	0.723269	av	0.0538257	0.0374033	0.694898		26.5594	1.44926	1.00782	0.0543903	0.720261	av	0.0545813	0.0379512	0.695309		20.5559	1.11942	0.77873	0.0543392	0.716267	av	0.0544951	0.0379045	0.695556
***	4.53609	4.63564	4.63136	0.336385	1.69276	stabw	0.000678779	0.000467681	0.000151727		4.32612	4.39507	4.3904	0.487457	1.49684	stabw	0.0021862	0.0015289	0.000750569		4.57663	4.62306	4.61546	0.395587	1.30277	stabw	0.00176979	0.0012355	0.00104215
***	1.61515	0.08947	0.0621214	0.00018168	0.0122432	stabw/(n)^0.5	9.59938e-05	6.61401e-05	2.14574e-05		1.14899	0.0636962	0.0442473	0.00026513	0.0107811	stabw/(n)^0.5	0.000309176	0.000216219	0.000106146		0.940767	0.0517516	0.035942	0.000214959	0.00933133	stabw/(n)^0.5	0.000250286	0.000174727	0.000147382
***	35.1364	35.9075	35.8743	2.60562	13.1121	(stabw/(n)^0.5)/av /%	0.00178342	0.00176829	3.08785e-05		33.51	34.0441	34.0079	3.77583	11.5944	(stabw/(n)^0.5)/av /%	0.00566451	0.00569731	0.000152661		35.4504	35.81	35.7512	3.06421	10.0912	(stabw/(n)^0.5)/av /%	0.00459281	0.00460966	0.000211891
***	12.5109	0.693031	0.48119	0.00140729	0.0948356						8.90005	0.493389	0.342738	0.00205369	0.0835102						7.28715	0.400866	0.278405	0.00166506	0.0722802
